# Supplementary material for: Managing flowering time in Miscanthus and sugarcane to facilitate intra- and intergeneric crosses
Source: PLoS One. 2021 Jan 7;16(1):e0240390. doi: 10.1371/journal.pone.0240390 (PMC7790387; doi:10.1371/journal.pone.0240390)
Supplement: S3 Table — (XLSX) [file pone.0240390.s005.xlsx]

## Sheet: meta-data
Table S3	First flowering date of Miscanthus and sugarcane in 2016-2017 greenhouse experiment
Experiment summary	To determine how to synchronize the flowering time of Miscanthus and saccharum, a series of greenhouse experiments were conducted over three years (2014-2017). This supplemental table contains raw data from the 2016-2017 greenhouse experiment. The 2016-2017 experiment was initiated on 26-29 July 2016. A total of 23 Saccharum genotypes and 23 Miscanthus genotypes were included.

## Sheet: S3 Table
			Decreasing day length			13 h constant
Entry	Species	control	Sep	Oct	Nov	Sep	Oct	Nov
M. sacchariflorus 'PMS-075'	Miscanthus	2016-10-08
M. sacchariflorus 'JM11-019'	Miscanthus	2016-10-08
M. sacchariflorus 'Tohoku-2010-036'	Miscanthus	2016-10-08
M. sacchariflorus 'Tohoku-2010-025'	Miscanthus	2016-10-12 16:04:48	2016-10-29			2016-12-02
M. sacchariflorus 'RU2012-037'	Miscanthus	2016-10-15	2016-10-29				2016-12-02
M. sacchariflorus 'Tohoku-2010-037'	Miscanthus	2016-10-15
M. sacchariflorus var. lutarioriparius 'PF30022'	Miscanthus	2016-10-29
M. floridulus 'US56-0022-03'	Miscanthus	2016-12-09
M. sacchariflorus 'RU2012-050'	Miscanthus						2016-12-02
M. sacchariflorus 'RU2012-078'	Miscanthus		2016-10-29				2016-12-02
S. hybr. 'L09-105'	Saccharum	2016-12-06
S. hybr. 'Ho91-552'	Saccharum	2017-01-05
S. hybr. 'US 84-1058'	Saccharum	2017-03-04
S. officinarum 'Ho06-9001'	Saccharum	2017-03-11
S. officinarum 'Ho06-9002'	Saccharum	2017-03-11
S. hybr. 'L79-1002'	Saccharum	2017-03-11
S. arundinaceum × Miscanthus 'Purple People Greeter'	Saccharum × Miscanthus	2017-04-08
