# Supplementary material for: Managing flowering time in Miscanthus and sugarcane to facilitate intra- and intergeneric crosses
Source: PLoS One. 2021 Jan 7;16(1):e0240390. doi: 10.1371/journal.pone.0240390 (PMC7790387; doi:10.1371/journal.pone.0240390)
Supplement: S4 Table — (XLSX) [file pone.0240390.s006.xlsx]

## Sheet: meta-data
S4 Table	Trait summary statistics in the controlled growth chamber experiment
Experiment summary	A total of 33 Miscanthus genotypes and two Sorghum bicolor controls (one short-day and one one day-neutral) were studied. After 42-61 d of establishment under constant long days (15 h) in growth chamber, all the aboveground stems of the Miscanthus plants were cut to 15 cm above the soil surface and then subjected to one of three day length treatments: 15 h, 12.5 h, and 10 h. For each combination …

## Sheet: S4 Table
						10 h		12.5 h		15 h
Entry	Ploidy	Lat	Long	Genetic group	Trait	Average	SE	Average	SE	Average	SE
M. sinensis 'Teshio'	2x	44.9	141.9	Northern Japan	Culm length	14.6889	0.200077	12.5333	0.758349	181.278	4.94453
M. sinensis 'EBI-2008-51c'	2x	43.5	142.7	Northern Japan	Culm length	17.4	0.533333	40.3889	13.516	158.6	0
M. sinensis 'EBI-2008-32a'	2x	43.4	141.4	Northern Japan	Culm length	14.6667	0.701057	17.2667	0.337611	200.922	5.36539
M. sinensis 'Tōhoku-2010-015a'	2x	40.2	140.2	Northern Japan	Culm length	15.6667	0.316667	16.3778	1.18064	122.623	0
M. sinensis 'Koike-11a'	2x	38	138.4	Southern Japan	Culm length	13.2667	1.05427	31.9889	3.30589	130.044	2.59362
M. sinensis 'Koike-12b'	2x	36.7	137.2	Southern Japan	Culm length	12.3	0	27.7333	2.05081	135.833	0
M. sinensis 'Sugadaira'	2x	36	138.1	Southern Japan	Culm length	10.7222	0.234587	13.7778	0.280432	93.9889	3.23368
M. sinensis 'Koike-21c'	2x	32.2	130.4	Southern Japan	Culm length	36.8	5.64519	108	4.54682	107.811	5.47808
M. sinensis 'Miyazaki'	2x	31.8	131.4	Southern Japan	Culm length	18.4111	0.236552	120.189	6.70514	90.8333	2.67026
M. ×giganteus '1993-1780'	3x				Culm length	84.6556	0.34925	141.011	8.2839	196	7.23482
M. sinensis 'Flamingo'	2x				Culm length	10.2889	0.226963	26.9889	4.15088	81.2667	2.57748
M. sinensis 'Gracillimus'	2x				Culm length	9.53333	0.164429	12.1667	0.116667	69.6	6.35022
M. sinensis x M. sacchariflorus BC 'Nippon'	2x				Culm length	6.8	0.327589	30.9	0	81.9444	3.7968
M. sinensis var. condensatus 'Cabaret'	2x				Culm length	16.7778	0.361239	109.311	8.97209	94.0444	2.66259
S. bicolor '100M'	2x				Culm length	51	1.56667	67.5556	3.35318	56.9667	3.86386
S. bicolor '38M'	2x				Culm length	82.9833	8.225	103.222	5.42826	73.925	6.88779
M. sinensis 'PMS-436'	2x	41.3	123.7	Korea/N China	Culm length	6.13333	0.298298	2.27778	0.146986	123.222	8.20136
M. sinensis 'PMS-438'	2x	41.3	123.7	Korea/N China	Culm length	14.5556	2.33572	7.94444	1.59885	93.6667	2.42861
M. sinensis 'PMS-164'	2x	37.3	114.3	Yangtze-Qinling	Culm length	7.68889	0.360855	7.77778	1.01074	176.289	3.73355
M. sinensis 'PMS-161'	2x	35.7	112.3	Yangtze-Qinling	Culm length	6.71111	0.823629	8	1	114.444	0.840708
M. sinensis 'PMS-159'	2x	34.1	111	Yangtze-Qinling	Culm length	13.3111	0.611717	27.4444	2.04822	108.889	4.88226
M. sinensis 'PMS-130'	2x	33.5	105.1	Yangtze-Qinling	Culm length	21.3	1.08222	22.6111	1.82342	67.1111	1.97515
M. sinensis 'PMS-204'	2x	31.7	114.9	Yangtze-Qinling	Culm length	20.4111	0.503721	32.6111	1.6876	175.778	6.44157
M. sinensis x M. sacchariflorus 2x 'PMS-300'	2x	30.8	120.1	Yangtze-Qinling	Culm length	23.1111	2.28846	47.3889	5.18285	146.444	1.49175
M. sinensis 'PMS-306'	2x	29.9	118.8	Yangtze-Qinling	Culm length	17.3222	0.886751	111.167	4.33734	157.444	5.13371
M. sinensis 'PMS-226'	2x	26.6	106.8	Sichuan Basin	Culm length	83.7	1.34825	224.778	6.38907	173.778	2.05556
M. sinensis 'PMS-314'	2x	26.5	119.6	Yangtze-Qinling	Culm length	36.6556	2.41428	24.6111	2.49552	164.556	7.33733
M. sinensis 'Onna-1a'	2x	26.5	126.8	SE China plus tropical	Culm length	61.6	4.34294	87.0333	9.11667	129.889	2.2923
M. sinensis 'Uruma-1b'	2x	26.3	127.9	SE China plus tropical	Culm length	90.8556	2.21465	72.2667	0	99.1222	2.18963
M. sinensis 'PMS-347'	2x	24.2	115.9	SE China plus tropical	Culm length	85.7667	2.54673	151.444	11.48	194.111	4.4952
M. sinensis 'PMS-359'	2x	22.9	112.3	SE China plus tropical	Culm length	85.2556	0.814813	231.056	4.00357	231.333	7.373
M. sinensis 'PMS-375'	2x	19.6	110.3	SE China plus tropical	Culm length	76.1111	3.78416	189.833	5.55923	208.333	6.38357
M. sinensis 'PMS-382'	2x	18.9	109.5	SE China plus tropical	Culm length	141.467	3.44787	215.5	2.91111	170.778	4.63914
M. floridulus 'NG77-022'	2x	-3.6	143.6	SE China plus tropical	Culm length	198.817	10.6583	183.133	26.0333	187.389	11.9738
M. floridulus 'US56-0022-03'	2x	-20.9	165.3	SE China plus tropical	Culm length	81.1556	4.24921	197.767	7.49839	114.489	4.83665
M. sinensis 'Teshio'	2x	44.9	141.9	Northern Japan	Days to first flagging					44	0
M. sinensis 'EBI-2008-51c'	2x	43.5	142.7	Northern Japan	Days to first flagging			38.5	5.25	44	0
M. sinensis 'EBI-2008-32a'	2x	43.4	141.4	Northern Japan	Days to first flagging					58	3.01386
M. sinensis 'Tōhoku-2010-015a'	2x	40.2	140.2	Northern Japan	Days to first flagging	39	0			72	0
M. sinensis 'Koike-11a'	2x	38	138.4	Southern Japan	Days to first flagging	39	0			87	6.00694
M. sinensis 'Koike-12b'	2x	36.7	137.2	Southern Japan	Days to first flagging					93	0
M. sinensis 'Sugadaira'	2x	36	138.1	Southern Japan	Days to first flagging					56	0
M. sinensis 'Koike-21c'	2x	32.2	130.4	Southern Japan	Days to first flagging	39	0	44.3333	1.16667	108.333	7.33333
M. sinensis 'Miyazaki'	2x	31.8	131.4	Southern Japan	Days to first flagging	39	0	44.3333	1.16667	131.667	14.1696
M. ×giganteus '1993-1780'	3x				Days to first flagging	91	16.039	51	2.33452	111	4
M. sinensis 'Flamingo'	2x				Days to first flagging			72.3333	11.8404	58	6.72681
M. sinensis 'Gracillimus'	2x				Days to first flagging					179	0
M. sinensis x M. sacchariflorus BC 'Nippon'	2x				Days to first flagging	38.6667	3.1798	42	0	42.3333	0.833333
M. sinensis var. condensatus 'Cabaret'	2x				Days to first flagging			102.667	4.20648	187.667	0.833333
S. bicolor '100M'	2x				Days to first flagging	44	0	59.6667	1.01379	124.8	7.59671
S. bicolor '38M'	2x				Days to first flagging	47.5	1.75	48.3333	2.33333	38.5	1.75
M. sinensis 'PMS-436'	2x	41.3	123.7	Korea/N China	Days to first flagging					75	2.08167
M. sinensis 'PMS-438'	2x	41.3	123.7	Korea/N China	Days to first flagging	35	0	53	0	42	0
M. sinensis 'PMS-164'	2x	37.3	114.3	Yangtze-Qinling	Days to first flagging					95	0
M. sinensis 'PMS-161'	2x	35.7	112.3	Yangtze-Qinling	Days to first flagging	98	0			74	0
M. sinensis 'PMS-159'	2x	34.1	111	Yangtze-Qinling	Days to first flagging	77	17.5	42	0	58.3333	1.16667
M. sinensis 'PMS-130'	2x	33.5	105.1	Yangtze-Qinling	Days to first flagging	35	2.02073	42	0	59.6667	1.66667
M. sinensis 'PMS-204'	2x	31.7	114.9	Yangtze-Qinling	Days to first flagging					112	0
M. sinensis x M. sacchariflorus 2x 'PMS-300'	2x	30.8	120.1	Yangtze-Qinling	Days to first flagging			0	0	169.667	1.16667
M. sinensis 'PMS-306'	2x	29.9	118.8	Yangtze-Qinling	Days to first flagging			65.6667	2.12786	127	0
M. sinensis 'PMS-226'	2x	26.6	106.8	Sichuan Basin	Days to first flagging	42	0	46.6667	3.08671	88	0
M. sinensis 'PMS-314'	2x	26.5	119.6	Yangtze-Qinling	Days to first flagging	57	2.46644			125.667	0.666667
M. sinensis 'Onna-1a'	2x	26.5	126.8	SE China plus tropical	Days to first flagging					272.667	7.59569
M. sinensis 'Uruma-1b'	2x	26.3	127.9	SE China plus tropical	Days to first flagging					336	0
M. sinensis 'PMS-347'	2x	24.2	115.9	SE China plus tropical	Days to first flagging	59.5	1.75	62	0.5	225.667	1.16667
M. sinensis 'PMS-359'	2x	22.9	112.3	SE China plus tropical	Days to first flagging	42	0	55.3333	1.16667	180	10
M. sinensis 'PMS-375'	2x	19.6	110.3	SE China plus tropical	Days to first flagging	63	0	96.3333	3.24465
M. sinensis 'PMS-382'	2x	18.9	109.5	SE China plus tropical	Days to first flagging	81	2	135.667	2.83333
M. floridulus 'NG77-022'	2x	-3.6	143.6	SE China plus tropical	Days to first flagging			77.5	3.75	125	2
M. floridulus 'US56-0022-03'	2x	-20.9	165.3	SE China plus tropical	Days to first flagging			100.667	4.04489
M. sinensis 'Teshio'	2x	44.9	141.9	Northern Japan	Days to first flowering					66.3333	0.333333
M. sinensis 'EBI-2008-51c'	2x	43.5	142.7	Northern Japan	Days to first flowering			42	0	67	0
M. sinensis 'EBI-2008-32a'	2x	43.4	141.4	Northern Japan	Days to first flowering					83	4
M. sinensis 'Tōhoku-2010-015a'	2x	40.2	140.2	Northern Japan	Days to first flowering					105	0
M. sinensis 'Koike-11a'	2x	38	138.4	Southern Japan	Days to first flowering					126.333	4.84195
M. sinensis 'Koike-12b'	2x	36.7	137.2	Southern Japan	Days to first flowering					130	0
M. sinensis 'Sugadaira'	2x	36	138.1	Southern Japan	Days to first flowering					96.3333	0.833333
M. sinensis 'Koike-21c'	2x	32.2	130.4	Southern Japan	Days to first flowering	49	0	60.6667	3.08671	164.333	5.67401
M. sinensis 'Miyazaki'	2x	31.8	131.4	Southern Japan	Days to first flowering	44	0	60.6667	1.16667	167.333	10.1708
M. ×giganteus '1993-1780'	3x				Days to first flowering	98	10.5	70.6667	3.43188	140	0
M. sinensis 'Flamingo'	2x				Days to first flowering					121	6.63953
M. sinensis 'Gracillimus'	2x				Days to first flowering					194	1.5
M. sinensis x M. sacchariflorus BC 'Nippon'	2x				Days to first flowering	26	0	56	0	73.6667	1.66667
M. sinensis var. condensatus 'Cabaret'	2x				Days to first flowering			108.5	1.75	229	1.60728
S. bicolor '100M'	2x				Days to first flowering	52	0.5	72.6667	1.48137	138.2	8.05823
S. bicolor '38M'	2x				Days to first flowering	59.5	1.75	59.6667	2.72845	49.5	1.63936
M. sinensis 'PMS-436'	2x	41.3	123.7	Korea/N China	Days to first flowering					115	4.16333
M. sinensis 'PMS-438'	2x	41.3	123.7	Korea/N China	Days to first flowering					71.6667	2.33333
M. sinensis 'PMS-164'	2x	37.3	114.3	Yangtze-Qinling	Days to first flowering					130	0
M. sinensis 'PMS-161'	2x	35.7	112.3	Yangtze-Qinling	Days to first flowering					132.667	2.83333
M. sinensis 'PMS-159'	2x	34.1	111	Yangtze-Qinling	Days to first flowering					96	1.60728
M. sinensis 'PMS-130'	2x	33.5	105.1	Yangtze-Qinling	Days to first flowering	42	0			119.333	2.16667
M. sinensis 'PMS-204'	2x	31.7	114.9	Yangtze-Qinling	Days to first flowering					169.667	3.08671
M. sinensis x M. sacchariflorus 2x 'PMS-300'	2x	30.8	120.1	Yangtze-Qinling	Days to first flowering					211.667	3.08671
M. sinensis 'PMS-306'	2x	29.9	118.8	Yangtze-Qinling	Days to first flowering			84	2.02073	173.333	2.83333
M. sinensis 'PMS-226'	2x	26.6	106.8	Sichuan Basin	Days to first flowering	56	0	76.3333	1.16667	189.333	3.03223
M. sinensis 'PMS-314'	2x	26.5	119.6	Yangtze-Qinling	Days to first flowering					166.333	1.48137
M. sinensis 'Onna-1a'	2x	26.5	126.8	SE China plus tropical	Days to first flowering					274	0.5
M. sinensis 'Uruma-1b'	2x	26.3	127.9	SE China plus tropical	Days to first flowering					360	0
M. sinensis 'PMS-347'	2x	24.2	115.9	SE China plus tropical	Days to first flowering	81	2	91	0	246.667	1.16667
M. sinensis 'PMS-359'	2x	22.9	112.3	SE China plus tropical	Days to first flowering	63	0	80.6667	1.01379	179	0
M. sinensis 'PMS-375'	2x	19.6	110.3	SE China plus tropical	Days to first flowering	91	0	141.667	3.71184
M. sinensis 'PMS-382'	2x	18.9	109.5	SE China plus tropical	Days to first flowering	91	0	183.667	5.64456
M. floridulus 'NG77-022'	2x	-3.6	143.6	SE China plus tropical	Days to first flowering			95	5	135	1.80278
M. floridulus 'US56-0022-03'	2x	-20.9	165.3	SE China plus tropical	Days to first flowering			114.333	1.16667
M. sinensis 'Teshio'	2x	44.9	141.9	Northern Japan	Leaf number	8	0.166667	9.66667	0.19245	13.4444	0.493789
M. sinensis 'EBI-2008-51c'	2x	43.5	142.7	Northern Japan	Leaf number	7.16667	0.0833333	6.44444	0.200308	13.3333	0
M. sinensis 'EBI-2008-32a'	2x	43.4	141.4	Northern Japan	Leaf number	7.55556	0.242161	9.44444	0.400617	17.3333	0.63099
M. sinensis 'Tōhoku-2010-015a'	2x	40.2	140.2	Northern Japan	Leaf number	8.5	0.0833333	9.88889	0.146986	18.6667	0
M. sinensis 'Koike-11a'	2x	38	138.4	Southern Japan	Leaf number	7.55556	0.293972	12.3333	1.04083	13.6667	0.673575
M. sinensis 'Koike-12b'	2x	36.7	137.2	Southern Japan	Leaf number	6.33333	0	11.5556	0.818384	12	0
M. sinensis 'Sugadaira'	2x	36	138.1	Southern Japan	Leaf number	7.22222	1.0289	10.5556	0.30932	9.22222	0.242161
M. sinensis 'Koike-21c'	2x	32.2	130.4	Southern Japan	Leaf number	12.7778	1.226	16.2222	2.71541	16.7778	0.111111
M. sinensis 'Miyazaki'	2x	31.8	131.4	Southern Japan	Leaf number	10.6667	0.419435	9.44444	0.0555556	9.33333	0.096225
M. ×giganteus '1993-1780'	3x				Leaf number	32.2222	0.30932	19.7778	0.633431	16	0.855267
M. sinensis 'Flamingo'	2x				Leaf number	7.33333	0.3849	8.22222	0.242161	9.11111	0.242161
M. sinensis 'Gracillimus'	2x				Leaf number	7.44444	0.200308	7.88889	0.146986	10.5556	0.728604
M. sinensis x M. sacchariflorus BC 'Nippon'	2x				Leaf number	8.22222	0.924629	4.66667	0	9.11111	0.65499
M. sinensis var. condensatus 'Cabaret'	2x				Leaf number	8.22222	0.277778	17.8889	0.493789	12.8889	0.734931
S. bicolor '100M'	2x				Leaf number	9.16667	1.08333	8.77778	0.777778	13.2667	0.637704
S. bicolor '38M'	2x				Leaf number	9.83333	1.91667	7.77778	0.433903	8.25	1.31476
M. sinensis 'PMS-436'	2x	41.3	123.7	Korea/N China	Leaf number	7.77778	0.400617	8	0.693889	5.55556	0.0555556
M. sinensis 'PMS-438'	2x	41.3	123.7	Korea/N China	Leaf number	6.11111	0.146986	5.33333	0	4.11111	0.146986
M. sinensis 'PMS-164'	2x	37.3	114.3	Yangtze-Qinling	Leaf number	8.22222	0.388889	5.44444	0.388889	9.33333	0.096225
M. sinensis 'PMS-161'	2x	35.7	112.3	Yangtze-Qinling	Leaf number	9.11111	0.364302	8.11111	0.474667	6.11111	0.0555556
M. sinensis 'PMS-159'	2x	34.1	111	Yangtze-Qinling	Leaf number	9.22222	0.547159	6.33333	0.254588	7.11111	0.337931
M. sinensis 'PMS-130'	2x	33.5	105.1	Yangtze-Qinling	Leaf number	11.8889	0.364302	7.44444	0.293972	5.44444	0.0555556
M. sinensis 'PMS-204'	2x	31.7	114.9	Yangtze-Qinling	Leaf number	8.66667	0.346944	7	0.254588	11.7778	0.200308
M. sinensis x M. sacchariflorus 2x 'PMS-300'	2x	30.8	120.1	Yangtze-Qinling	Leaf number	10.5556	0.734931	11	0.751542	13.7778	0.364302
M. sinensis 'PMS-306'	2x	29.9	118.8	Yangtze-Qinling	Leaf number	9.11111	0.30932	10.2222	0.474667	10.3333	0.440959
M. sinensis 'PMS-226'	2x	26.6	106.8	Sichuan Basin	Leaf number	7.11111	0.0555556	17.7778	0.454742	14.2222	1.10694
M. sinensis 'PMS-314'	2x	26.5	119.6	Yangtze-Qinling	Leaf number	11.4444	0.388889	6.33333	0.63099	11	0.419435
M. sinensis 'Onna-1a'	2x	26.5	126.8	SE China plus tropical	Leaf number	13	0.346944	11.3333	0.833333	14	0.535758
M. sinensis 'Uruma-1b'	2x	26.3	127.9	SE China plus tropical	Leaf number	15.7778	0.474667	13.6667	0	13.7778	0.30932
M. sinensis 'PMS-347'	2x	24.2	115.9	SE China plus tropical	Leaf number	8.77778	0.111111	14.1111	0.529966	14.6667	0.346944
M. sinensis 'PMS-359'	2x	22.9	112.3	SE China plus tropical	Leaf number	9.22222	0.388889	11.7778	0.293972	18	0.3849
M. sinensis 'PMS-375'	2x	19.6	110.3	SE China plus tropical	Leaf number	11.5556	0.200308	15.5556	0.640698	25.1111	1.36874
M. sinensis 'PMS-382'	2x	18.9	109.5	SE China plus tropical	Leaf number	12.7778	0.493789	14.7778	0.433903	18.8889	0.293972
M. floridulus 'NG77-022'	2x	-3.6	143.6	SE China plus tropical	Leaf number	28	2.33333	22.6667	2.16667	18	0.254588
M. floridulus 'US56-0022-03'	2x	-20.9	165.3	SE China plus tropical	Leaf number	20.7778	0.783708	14.2222	0.433903	24.4444	0.547159
M. sinensis 'Teshio'	2x	44.9	141.9	Northern Japan	Reproductive shoot number	0	0	0	0	6.33333	0.440959
M. sinensis 'EBI-2008-51c'	2x	43.5	142.7	Northern Japan	Reproductive shoot number	0	0	2	0.763763	8	0
M. sinensis 'EBI-2008-32a'	2x	43.4	141.4	Northern Japan	Reproductive shoot number	0	0	0	0	9.33333	0.833333
M. sinensis 'Tōhoku-2010-015a'	2x	40.2	140.2	Northern Japan	Reproductive shoot number	0.5	0.25	0	0	16	0
M. sinensis 'Koike-11a'	2x	38	138.4	Southern Japan	Reproductive shoot number	0	0	0	0	13.6667	2.08833
M. sinensis 'Koike-12b'	2x	36.7	137.2	Southern Japan	Reproductive shoot number	0	0	0	0	14	0
M. sinensis 'Sugadaira'	2x	36	138.1	Southern Japan	Reproductive shoot number	0	0	0	0	13	0.763763
M. sinensis 'Koike-21c'	2x	32.2	130.4	Southern Japan	Reproductive shoot number	0.666667	0.333333	4.66667	0.440959	16	0.57735
M. sinensis 'Miyazaki'	2x	31.8	131.4	Southern Japan	Reproductive shoot number	0	0	3.66667	0.166667	5.33333	0.440959
M. ×giganteus '1993-1780'	3x				Reproductive shoot number	5.33333	0.166667	8.33333	0.703167	10	1.5
M. sinensis 'Flamingo'	2x				Reproductive shoot number	0	0	1.66667	0.166667	19	2.25462
M. sinensis 'Gracillimus'	2x				Reproductive shoot number	0	0	0	0	19	1
M. sinensis x M. sacchariflorus BC 'Nippon'	2x				Reproductive shoot number	0.333333	0.166667	4	0	54.3333	1.16667
M. sinensis var. condensatus 'Cabaret'	2x				Reproductive shoot number	0	0	1.66667	0.166667	3	0
S. bicolor '100M'	2x				Reproductive shoot number	5.5	0.25	8.33333	0.440959	3.2	0.187083
S. bicolor '38M'	2x				Reproductive shoot number	4.5	0.75	14.6667	0.927961	2.25	0.239357
M. sinensis 'PMS-436'	2x	41.3	123.7	Korea/N China	Reproductive shoot number	0	0	0	0	8	1.60728
M. sinensis 'PMS-438'	2x	41.3	123.7	Korea/N China	Reproductive shoot number	2	0.288675	0	0	26.3333	3.1798
M. sinensis 'PMS-164'	2x	37.3	114.3	Yangtze-Qinling	Reproductive shoot number	0	0	0	0	27	0.57735
M. sinensis 'PMS-161'	2x	35.7	112.3	Yangtze-Qinling	Reproductive shoot number	0.666667	0.333333	0	0	7.33333	1.01379
M. sinensis 'PMS-159'	2x	34.1	111	Yangtze-Qinling	Reproductive shoot number	0.666667	0.166667	0	0	14.3333	1.76383
M. sinensis 'PMS-130'	2x	33.5	105.1	Yangtze-Qinling	Reproductive shoot number	1.66667	0.166667	0	0	2.66667	0.600925
M. sinensis 'PMS-204'	2x	31.7	114.9	Yangtze-Qinling	Reproductive shoot number	0	0	0	0	19.3333	0.440959
M. sinensis x M. sacchariflorus 2x 'PMS-300'	2x	30.8	120.1	Yangtze-Qinling	Reproductive shoot number	0	0	0	0	15.3333	1.96497
M. sinensis 'PMS-306'	2x	29.9	118.8	Yangtze-Qinling	Reproductive shoot number	0	0	5	0.288675	24.6667	1.5899
M. sinensis 'PMS-226'	2x	26.6	106.8	Sichuan Basin	Reproductive shoot number	8.33333	0.600925	38.3333	0.726483	26.6667	1.16667
M. sinensis 'PMS-314'	2x	26.5	119.6	Yangtze-Qinling	Reproductive shoot number	1.33333	0.166667	0	0	19.6667	1.30171
M. sinensis 'Onna-1a'	2x	26.5	126.8	SE China plus tropical	Reproductive shoot number	0	0	0	0	13.6667	2.89156
M. sinensis 'Uruma-1b'	2x	26.3	127.9	SE China plus tropical	Reproductive shoot number	0	0	0	0	2.66667	0.333333
M. sinensis 'PMS-347'	2x	24.2	115.9	SE China plus tropical	Reproductive shoot number	4	1.1547	29.6667	7.09656	21.3333	1.16667
M. sinensis 'PMS-359'	2x	22.9	112.3	SE China plus tropical	Reproductive shoot number	2.33333	0.440959	35.3333	1.20185	7	1.73205
M. sinensis 'PMS-375'	2x	19.6	110.3	SE China plus tropical	Reproductive shoot number	1	0.288675	38	0.5	0	0
M. sinensis 'PMS-382'	2x	18.9	109.5	SE China plus tropical	Reproductive shoot number	2.33333	0.726483	19	1	0	0
M. floridulus 'NG77-022'	2x	-3.6	143.6	SE China plus tropical	Reproductive shoot number	0	0	6	1	7	0.866025
M. floridulus 'US56-0022-03'	2x	-20.9	165.3	SE China plus tropical	Reproductive shoot number	0	0	13.6667	0.333333	0	0
M. sinensis 'Teshio'	2x	44.9	141.9	Northern Japan	Reproductive shoot ratio	0	0	0	0	0.218105	0.015682
M. sinensis 'EBI-2008-51c'	2x	43.5	142.7	Northern Japan	Reproductive shoot ratio	0	0	0.0378086	0.0166433	0.266667	0
M. sinensis 'EBI-2008-32a'	2x	43.4	141.4	Northern Japan	Reproductive shoot ratio	0	0	0	0	0.293133	0.0338527
M. sinensis 'Tōhoku-2010-015a'	2x	40.2	140.2	Northern Japan	Reproductive shoot ratio	0.00943396	0.00471698	0	0	0.421053	0
M. sinensis 'Koike-11a'	2x	38	138.4	Southern Japan	Reproductive shoot ratio	0	0	0	0	0.391908	0.0853633
M. sinensis 'Koike-12b'	2x	36.7	137.2	Southern Japan	Reproductive shoot ratio	0	0	0	0	0.358974	0
M. sinensis 'Sugadaira'	2x	36	138.1	Southern Japan	Reproductive shoot ratio	0	0	0	0	0.223821	0.00693652
M. sinensis 'Koike-21c'	2x	32.2	130.4	Southern Japan	Reproductive shoot ratio	0.00952381	0.0047619	0.0523235	0.00456435	0.38498	0.00548159
M. sinensis 'Miyazaki'	2x	31.8	131.4	Southern Japan	Reproductive shoot ratio	0	0	0.0882912	0.00411221	0.297222	0.054663
M. ×giganteus '1993-1780'	3x				Reproductive shoot ratio	0.152434	0.00349207	0.19719	0.0213119	0.354217	0.0318472
M. sinensis 'Flamingo'	2x				Reproductive shoot ratio	0	0	0.0139717	0.00235583	0.385651	0.0241918
M. sinensis 'Gracillimus'	2x				Reproductive shoot ratio	0	0	0	0	0.179087	0.0133104
M. sinensis x M. sacchariflorus BC 'Nippon'	2x				Reproductive shoot ratio	0.00085034	0.00042517	0.0307692	0	0.558136	0.0383718
M. sinensis var. condensatus 'Cabaret'	2x				Reproductive shoot ratio	0	0	0.041855	0.00232456	0.0662055	0.000494071
S. bicolor '100M'	2x				Reproductive shoot ratio	0.481061	0.032197	0.51293	0.0717679	0.693333	0.0226078
S. bicolor '38M'	2x				Reproductive shoot ratio	0.6	0	0.692505	0.0204203	0.805556	0.0972222
M. sinensis 'PMS-436'	2x	41.3	123.7	Korea/N China	Reproductive shoot ratio	0	0	0	0	0.331452	0.0334807
M. sinensis 'PMS-438'	2x	41.3	123.7	Korea/N China	Reproductive shoot ratio	0.0149941	0.00223861	0	0	0.489518	0.0491056
M. sinensis 'PMS-164'	2x	37.3	114.3	Yangtze-Qinling	Reproductive shoot ratio	0	0	0	0	0.562767	0.0267749
M. sinensis 'PMS-161'	2x	35.7	112.3	Yangtze-Qinling	Reproductive shoot ratio	0.020202	0.010101	0	0	0.556802	0.0353804
M. sinensis 'PMS-159'	2x	34.1	111	Yangtze-Qinling	Reproductive shoot ratio	0.00495834	0.00124023	0	0	0.445322	0.0316746
M. sinensis 'PMS-130'	2x	33.5	105.1	Yangtze-Qinling	Reproductive shoot ratio	0.0192184	0.00214372	0	0	0.376984	0.0851789
M. sinensis 'PMS-204'	2x	31.7	114.9	Yangtze-Qinling	Reproductive shoot ratio	0	0	0	0	0.359987	0.00348583
M. sinensis x M. sacchariflorus 2x 'PMS-300'	2x	30.8	120.1	Yangtze-Qinling	Reproductive shoot ratio	0	0	0	0	0.186439	0.0147976
M. sinensis 'PMS-306'	2x	29.9	118.8	Yangtze-Qinling	Reproductive shoot ratio	0	0	0.0584277	0.00361211	0.400799	0.0238169
M. sinensis 'PMS-226'	2x	26.6	106.8	Sichuan Basin	Reproductive shoot ratio	0.0666724	0.00264942	0.399852	0.0179629	0.43099	0.0153827
M. sinensis 'PMS-314'	2x	26.5	119.6	Yangtze-Qinling	Reproductive shoot ratio	0.0136176	0.00195947	0	0	0.584886	0.0517838
M. sinensis 'Onna-1a'	2x	26.5	126.8	SE China plus tropical	Reproductive shoot ratio	0	0	0	0	0.306331	0.0649596
M. sinensis 'Uruma-1b'	2x	26.3	127.9	SE China plus tropical	Reproductive shoot ratio	0	0	0	0	0.0523608	0.00395344
M. sinensis 'PMS-347'	2x	24.2	115.9	SE China plus tropical	Reproductive shoot ratio	0.0346833	0.00964615	0.221473	0.0409601	0.30366	0.0183666
M. sinensis 'PMS-359'	2x	22.9	112.3	SE China plus tropical	Reproductive shoot ratio	0.0205353	0.00320897	0.375166	0.0147452	0.139041	0.0335853
M. sinensis 'PMS-375'	2x	19.6	110.3	SE China plus tropical	Reproductive shoot ratio	0.0108306	0.00313783	0.612937	0.0129836	0	0
M. sinensis 'PMS-382'	2x	18.9	109.5	SE China plus tropical	Reproductive shoot ratio	0.0267029	0.0067092	0.397222	0.0421462	0	0
M. floridulus 'NG77-022'	2x	-3.6	143.6	SE China plus tropical	Reproductive shoot ratio	0	0	0.225275	0.0412088	0.632143	0.0186434
M. floridulus 'US56-0022-03'	2x	-20.9	165.3	SE China plus tropical	Reproductive shoot ratio	0	0	0.352949	0.0160263	0	0
M. sinensis 'Teshio'	2x	44.9	141.9	Northern Japan	Shoot number	55.3333	1.20185	49.3333	10.5764	29.3333	1.09291
M. sinensis 'EBI-2008-51c'	2x	43.5	142.7	Northern Japan	Shoot number	74.5	1.75	73	9.01388	30	0
M. sinensis 'EBI-2008-32a'	2x	43.4	141.4	Northern Japan	Shoot number	77.6667	5.67401	81	1.32288	33	1.25831
M. sinensis 'Tōhoku-2010-015a'	2x	40.2	140.2	Northern Japan	Shoot number	70	8.5	104	9.87843	38	0
M. sinensis 'Koike-11a'	2x	38	138.4	Southern Japan	Shoot number	85.6667	5.29413	85	8.35165	38.6667	2.33333
M. sinensis 'Koike-12b'	2x	36.7	137.2	Southern Japan	Shoot number	129	0	113	4.48144	39	0
M. sinensis 'Sugadaira'	2x	36	138.1	Southern Japan	Shoot number	69.6667	4.43784	62	5.63471	57.6667	1.76383
M. sinensis 'Koike-21c'	2x	32.2	130.4	Southern Japan	Shoot number	59	2.78388	88.6667	2.77389	41.6667	1.69148
M. sinensis 'Miyazaki'	2x	31.8	131.4	Southern Japan	Shoot number	19.6667	1.30171	42.3333	3.00463	23	4.25245
M. ×giganteus '1993-1780'	3x				Shoot number	35	0.763763	45	2.89252	28.3333	4.34294
M. sinensis 'Flamingo'	2x				Shoot number	72.3333	5.34114	132.333	12.0324	48	3.96863
M. sinensis 'Gracillimus'	2x				Shoot number	364	4.16333	153.667	16.9665	107.333	2.08833
M. sinensis x M. sacchariflorus BC 'Nippon'	2x				Shoot number	376	13.3167	130	0	100.333	5.52519
M. sinensis var. condensatus 'Cabaret'	2x				Shoot number	96.6667	3.94053	41	5.058	45.3333	0.333333
S. bicolor '100M'	2x				Shoot number	11.5	0.25	18.6667	2.45515	4.6	0.2
S. bicolor '38M'	2x				Shoot number	7.5	1.25	21	0.763763	4	0.866025
M. sinensis 'PMS-436'	2x	41.3	123.7	Korea/N China	Shoot number	88	6.89807	54.6667	3.33333	21.6667	3.08671
M. sinensis 'PMS-438'	2x	41.3	123.7	Korea/N China	Shoot number	141.667	14.2078	125	10.2754	55	4.25245
M. sinensis 'PMS-164'	2x	37.3	114.3	Yangtze-Qinling	Shoot number	90.3333	14.1931	55	4.82183	49.3333	3.56293
M. sinensis 'PMS-161'	2x	35.7	112.3	Yangtze-Qinling	Shoot number	36.3333	2.45515	20.6667	2.48886	12.6667	1.01379
M. sinensis 'PMS-159'	2x	34.1	111	Yangtze-Qinling	Shoot number	138.333	2.04803	57.3333	5.20683	32.3333	3.08671
M. sinensis 'PMS-130'	2x	33.5	105.1	Yangtze-Qinling	Shoot number	91.6667	11.6273	79.3333	13.3832	7	0.288675
M. sinensis 'PMS-204'	2x	31.7	114.9	Yangtze-Qinling	Shoot number	158.333	22.2904	77.3333	2.18581	53.6667	0.833333
M. sinensis x M. sacchariflorus 2x 'PMS-300'	2x	30.8	120.1	Yangtze-Qinling	Shoot number	178.667	5.13431	127.667	22.3184	84.6667	11.1405
M. sinensis 'PMS-306'	2x	29.9	118.8	Yangtze-Qinling	Shoot number	120	6.60177	86.6667	4.34294	62.3333	4.04489
M. sinensis 'PMS-226'	2x	26.6	106.8	Sichuan Basin	Shoot number	123.667	4.63081	97	3.5473	62	2.02073
M. sinensis 'PMS-314'	2x	26.5	119.6	Yangtze-Qinling	Shoot number	102.333	6.88799	61.6667	2.31541	36.6667	4.43784
M. sinensis 'Onna-1a'	2x	26.5	126.8	SE China plus tropical	Shoot number	55	5.85947	50	1	45.3333	0.726483
M. sinensis 'Uruma-1b'	2x	26.3	127.9	SE China plus tropical	Shoot number	73.6667	1.96497	78	0	49.6667	2.48886
M. sinensis 'PMS-347'	2x	24.2	115.9	SE China plus tropical	Shoot number	124.667	5.8902	113.333	15.3578	71	3.17543
M. sinensis 'PMS-359'	2x	22.9	112.3	SE China plus tropical	Shoot number	109.333	3.91933	95.3333	4.6398	48.6667	0.927961
M. sinensis 'PMS-375'	2x	19.6	110.3	SE China plus tropical	Shoot number	114	10.751	62.3333	2.02759	45.3333	1.48137
M. sinensis 'PMS-382'	2x	18.9	109.5	SE China plus tropical	Shoot number	72.6667	11.3664	50.6667	3.34581	40	1.73205
M. floridulus 'NG77-022'	2x	-3.6	143.6	SE China plus tropical	Shoot number	9.5	3.25	27	0.5	11	1.32288
M. floridulus 'US56-0022-03'	2x	-20.9	165.3	SE China plus tropical	Shoot number	31.6667	1.85592	39.3333	1.85592	19.3333	1.424
