# Supplementary material for: Managing flowering time in Miscanthus and sugarcane to facilitate intra- and intergeneric crosses
Source: PLoS One. 2021 Jan 7;16(1):e0240390. doi: 10.1371/journal.pone.0240390 (PMC7790387; doi:10.1371/journal.pone.0240390)
Supplement: S6 Table — (XLSX) [file pone.0240390.s008.xlsx]

## Sheet: meta-data
Experiment description	A total of 33 Miscanthus genotypes and two Sorghum bicolor controls (one short-day and one one day-neutral) were studied. After 42-61 d of establishment under constant long days (15 h) in growth chamber, all the aboveground stems of the Miscanthus plants were cut to 15 cm above the soil surface and then subjected to one of three day length treatments: 15 h, 12.5 h, and 10 h. For each combination …

## Sheet: Potential Entry List
Name	Accession ID	Species	POP	Alt ID_1	Alt ID_2	Clone (1=Yes)	Seed (1=Yes)	Date sent to U.S.	Clone arrival date	Clone inventory	Seed arrival date	Seed inventory (g)	Country	Perfecture, state, province	City	Location/Site	Day-length Set1	Day-length Set2	Low-temperature Set1	Low-temperature Set2	# pots 5 July 2012	# pots in GH	DNA sent to Yamada	Priority for use in growth chamber study	Lat	Long	Elev (m)	Habitat conditions	Soil Type	Stem height (m)	Stem diameter (mm)	Stem density (#/m2)	Pop size (m)	Pop density	Stem density score (1-9)	Collection date	Species (collector's designation)	Form for pop (seed or clone)	Notes_1 (Yamada)	Notes_2 (Sacks)
Uruma-1a	OKA-2010-002	M. sinensis	Uruma-1	2010-OKA-002			1				2011-01-03		Japan	Okinawa	Uruma				1			2		1	26.3403	127.855										2010-12-23	sinensis	Seeds
Uruma-1b	OKA-2010-002	M. sinensis	Uruma-1	2010-OKA-002			1				2011-01-03		Japan	Okinawa	Uruma		1				4	2	1	1	26.3403	127.855										2010-12-23	sinensis	Seeds
Onna-1a	OKA-2010-001a	M. sinensis	Onna-1	2010-OKA-001			1				2011-01-03		Japan	Okinawa	Onna		1 alt				2	2	1	2	26.4459	127.806										2010-12-23	sinensis	Seeds
Onna-1d	OKA-2010-001d	M. sinensis	Onna-1	2010-OKA-001			1				2011-01-03		Japan	Okinawa	Onna						2	1	1	2	26.4459	127.806										2010-12-23	sinensis	Seeds
Onna-1c	OKA-2010-001c	M. sinensis	Onna-1	2010-OKA-001			1				2011-01-03		Japan	Okinawa	Onna		1 alt				2	2	1	2	26.4459	127.806										2010-12-23	sinensis	Seeds
Onna-1b	OKA-2010-001b	M. sinensis	Onna-1	2010-OKA-001			1				2011-01-03		Japan	Okinawa	Onna		1 alt				2	2		2	26.4459	127.806										2010-12-23	sinensis	Seeds
Koike-23	Koike-23	M. sinensis	Koike-23				1				2008-03-01	7.835	Japan	Kagoshima	Gunmoto									3	31.56	130.54	50									2007-10-01	sinensis
Miscanthus sinensis 'Miyazaki'	Koike-22a	M. sinensis	Koike-22	UI11-00001													2		2		4	1		4	31.83	131.42	30
Koike-21a	Koike-21a	M. sinensis	Koike-21				1				2008-03-01	18.025	Japan	Kumamoto	Tama-gun		3				2	2	1	4 high	32.16	130.39	560									2007-10-01	sinensis
Koike-21b	Koike-21b	M. sinensis	Koike-21				1				2008-03-01	18.025	Japan	Kumamoto	Tama-gun				3			2		4 high	32.16	130.39	560									2007-10-01	sinensis
Koike-21c	Koike-21c	M. sinensis	Koike-21				1				2008-03-01	18.025	Japan	Kumamoto	Tama-gun		3				4	2		4 high	32.16	130.39	560									2007-10-01	sinensis
Koike-17	Koike-17	M. sinensis	Koike-17				1				2008-03-01	15.14	Japan	Hyogo	Kobe									5	34.72	135	50									2007-10-01	sinensis
Miscanthus sinensis 'Sugadaira'	Koike-25	M. sinensis	Koike-25	UI11-00002													4		4					6 high	36	138.12	1120
Koike-12	Koike-12	M. sinensis	Koike-12				1				2008-03-01	15.585	Japan	Toyama	Gofuku		5		5			1		6	36.7	137.19	80									2007-10-01	sinensis
Koike-11a	Koike-11a	M. sinensis	Koike-11				1				2008-03-01	6.26	Japan	Niigata	Sado						2	2		7	38	138.36	100									2007-10-01	sinensis
Koike-11b	Koike-11b	M. sinensis	Koike-11				1				2008-03-01	6.26	Japan	Niigata	Sado						2	2		7	38	138.36	100									2007-10-01	sinensis
Tōhoku-2010-008a	Tōhoku-2010-008a	M. sinensis	Tōhoku-2010-008				1				2011-03-22		Japan	Akita	Akitashi	Shimoshinjonakano					2	2		8	39.7963	140.038	10.2	Seashore		2	10		20×50	small		2010-10-22	sinensis	Seeds		On sand dune on coast.
Tōhoku-2010-015a	Tōhoku-2010-015a	M. sinensis	Tōhoku-2010-015				1				2011-03-22		Japan	Akita	Noshiroshi	Futatsuimachitane					2	2		9	40.216	140.226	19.6	Road side		2.67	8		100×30	high		2010-10-22	sinensis	Seeds	Next to Ogi, hybrid seeds？	Growing in a mixture of Msi, Msa and Phragmites.
Tōhoku-2010-015b	Tōhoku-2010-015b	M. sinensis	Tōhoku-2010-015				1				2011-03-22		Japan	Akita	Noshiroshi	Futatsuimachitane					2	2		9	40.216	140.226	19.6	Road side		2.67	8		100×30	high		2010-10-22	sinensis	Seeds	Next to Ogi, hybrid seeds？	Growing in a mixture of Msi, Msa and Phragmites.
EBI-2008-32a	EBI-2008-32a	M. sinensis	EBI-2008-32	Atsuta			1				2009-03-01		Japan	Hokkaido	Ishikari	Atsuta					2	1		11	43.3931	141.432	32.3088									2008-10-08	sinensis
EBI-2008-51a	EBI-2008-51a	M. sinensis	EBI-2008-51	Biei ④			1				2009-03-01		Japan	Hokkaido	Biei	Biei ④			6			2		11 high	43.4482	142.646	907.085									2008-10-09	sinensis		Bogakudai
EBI-2008-51c	EBI-2008-51c	M. sinensis	EBI-2008-51	Biei ④			1				2009-03-01		Japan	Hokkaido	Biei	Biei ④	6				2	2		11 high	43.4482	142.646	907.085									2008-10-09	sinensis		Bogakudai
EBI-2008-51d	EBI-2008-51d	M. sinensis	EBI-2008-51	Biei ④			1				2009-03-01		Japan	Hokkaido	Biei	Biei ④	6				1	2		11 high	43.4482	142.646	907.085									2008-10-09	sinensis		Bogakudai
EBI-2008-51b	EBI-2008-51b	M. sinensis	EBI-2008-51	Biei ④			1				2009-03-01		Japan	Hokkaido	Biei	Biei ④	6					1	1	11 high	43.4482	142.646	907.085									2008-10-09	sinensis		Bogakudai
Miscanthus sinensis 'Teshio'	Koike-1	M. sinensis	Koike-1	UI11-00003													7		7					12	44.9167	141.983	100
Koike-01	Koike-01	M. sinensis	Koike-01				1				2008-03-01	2.335	Japan	Hokkaido	(Teshio) Toikanbetsu							1		12 alt	44.9167	141.983	100									2007-10-01	sinensis
													Japan
													Japan
M. ×giganteus 'Illinois'	UI10-00107	M. ×giganteus	M. ×giganteus 'Illinois'	UI10-00107													8	11	8	11	6	12	1
M. sinensis 'Nippon'	UI10-00074	M. sinensis	M. sinensis 'Nippon'	UI10-00074													9	12			7	9	1
M. sinensis var. condensatus 'Cabaret'	UI10-00012	M. sinensis	M. sinensis var. condensatus 'Cabaret'	UI10-00012									Japan				10		10		6	12	1
M. floridulus 'US56-0022-03'	PI230189	M. floridulus	M. floridulus 'US56-0022-03'	PI230189									Thailand				11		11		6	12	1
Miscanthus 'NG77-022'	PI417947	M. floridulus	Miscanthus 'NG77-022'	PI417947									Papua New Guinea				12		12		6	12	1
Miscanthus sinensis var. purpurascens	UI10-00019	Mi.sinensis var. purpurascens	Miscanthus sinensis var. purpurascens	UI10-00019															9			9
Miscanthus sinensis 'Flamingo'	UI10-00041	M. sinensis	Miscanthus sinensis 'Flamingo'														13				6	6	1
Miscanthus sinensis 'Ferner Osten (Far East)'	UI10-00040	M. sinensis	Miscanthus sinensis 'Ferner Osten (Far East)'														14				6	3	1
Miscanthus sacchariflorus 'Hortico'	UI10-00008	M. sacchariflorus	Miscanthus sacchariflorus 'Hortico'																13	12	6	10
Miscanthus sinensis 'Blondo'	UI11-00017	M. sinensis	Miscanthus sinensis 'Blondo'																14			6
Miscanthus sinensis 'Huron Sunrise'	UI10-00058	M. sinensis	Miscanthus sinensis 'Huron Sunrise'																15			6
Miscanthus sinensis 'Emmanuel LePage'	UI10-00039	M. sinensis	Miscanthus sinensis 'Emmanuel LePage'																16			6
Miscanthus transmorrisonensis	UI10-00106	M. sinensis var. transmorrisonensis	Miscanthus transmorrisonensis																17			6
Miscanthus sinensis 'Gracillimus'	UI10-00048	M. sinensis	Miscanthus sinensis 'Gracillimus'		ECG												15				6	6	1
Miscanthus sinensis 'Miyazaki'	UI11-00001.1	M. sinensis	Koike-22										Japan									1		4	31.83	131.42	30
Miscanthus sinensis 'Miyazaki'	UI11-00001.3	M. sinensis	Koike-22										Japan									1		4	31.83	131.42	30
Miscanthus sinensis 'Miyazaki'	UI11-00001.5	M. sinensis	Koike-22										Japan				2				6	7	1	4	31.83	131.42	30
Miscanthus sinensis 'Miyazaki'	UI11-00001.6	M. sinensis	Koike-22										Japan						2			6		4	31.83	131.42	30
Miscanthus sinensis 'Miyazaki'	UI11-00001.7	M. sinensis	Koike-22										Japan									1		4	31.83	131.42	30
Miscanthus sinensis 'Sugadaira'	UI11-00002.2	M. sinensis	Koike-25										Japan									2		6 high	36	138.12	1120
Miscanthus sinensis 'Sugadaira'	UI11-00002.3	M. sinensis	Koike-25										Japan						4			6		6 high	36	138.12	1120
Miscanthus sinensis 'Sugadaira'	UI11-00002.4	M. sinensis	Koike-25										Japan				4				6	6	1	6 high	36	138.12	1120
Miscanthus sinensis 'Teshio'	UI11-00003.2	M. sinensis	Koike-1										Japan									1		12	44.9167	141.983	100
Miscanthus sinensis 'Teshio'	UI11-00003.3	M. sinensis	Koike-1										Japan				7				6	6	1	12	44.9167	141.983	100
Miscanthus sinensis 'Teshio'	UI11-00003.5	M. sinensis	Koike-1										Japan						7			6		12	44.9167	141.983	100
Miscanthus sinensis 'Uruyu'	UI11-00004.2	M. sinensis											Japan				alt					3	1		44.22	142.05	200
Miscanthus sinensis 'Uruyu'	UI11-00004.4	M. sinensis											Japan						18			6			44.22	142.05	200
	PMS-007	M. sinensis											China	Hubei	Badong										30.7977	110.262	1758
	PMS-009	M. sinensis							2011-05-11				China	Hubei	Jianshi										30.5839	109.705	583
	PMS-014	M. sinensis							2011-05-11				China	Hubei	Xianfeng										29.657	109.119	770
	PMS-023	M. sinensis						2011-04-19	2012-06-26				China	Chongqing	Fengdu										29.8971	107.695	228
	PMS-038	M. sinensis							2011-05-11				China	Sichuan	Daying										30.5766	105.243	397
	PMS-067	M. sinensis						2011-04-19	2012-06-26				China	Sichuan	Chengdu										30.5563	104.305	690
	PMS-071	M. sacchariflorus						2011-04-19	2012-06-26				China	Beijing	Beijing										40.3906	117.007	116
	PMS-074	M. sacchariflorus						2011-04-19	2012-06-26				China	Beijing	Beijing										40.1345	116.175	43
	PMS-075	M. sacchariflorus							2010-06-28				China	Beijing	Beijing										40.1346	116.175	46
	PMS-076	M. sacchariflorus						2011-04-19	2012-06-26				China	Beijing	Beijing										40.1641	116.05	141
	PMS-087	M. sinensis						2011-04-19	2012-06-26				China	Hubei	Shenlongjia										31.4701	110.388	1258
	PMS-088	M. sinensis						2011-04-19	2012-06-26				China	Hubei	Shenlongjia										31.4935	110.367	1499
	PMS-130	M. sinensis						2011-04-19	2012-06-26				China	Gansu	Longnan			8		8			1		33.4555	105.137	1807
	PMS-131	M. sinensis						2011-04-19	2012-06-26				China	Gansu	Longnan										33.5025	105.356	1116
	PMS-134	M. sinensis							2011-05-11				China	Gansu	Longnan										33.7577	105.796	1009
	PMS-144	M. sinensis							2010-06-29				China	Shaanxi	Baoji										34.245	106.933	1467
	PMS-159	M. sinensis							2010-06-01				China	Henan	Sanmenxia										34.1295	111.044	757
	PMS-161	M. sinensis						2011-04-19	2012-06-26				China	Shanxi	Qinshui										35.722	112.325	724
	PMS-164	M. sinensis						2011-04-19	2012-06-26				China	Hebei	Xingtai			9		9					37.34	114.281	360
	PMS-178	M. sinensis							2010-06-28				China	Henan	Zhengzhou										34.511	113.041	1488
	PMS-183	M. sinensis							2010-06-01				China	Henan	Xinyang										31.7475	115.488	205
	PMS-204	M. sinensis						2011-04-19	2012-06-26				China	Henan	Xinyang			7		7			1		31.7013	114.874	103
	PMS-226	M. sinensis						2011-04-19	2012-06-26				China	Guizhou	Guiyang					5					26.6206	106.751	1133
	PMS-227	M. sinensis						2011-04-19	2012-06-26				China	Guizhou	Guiyang										26.6148	106.748	1095
	PMS-272	M. sinensis							2012-06-26				China	Jiangxi	Yugan										28.7312	116.441	32
	PMS-285	M. sinensis							2011-05-11				China	Anhui	Huangshan										29.6435	118.158	176
	PMS-293	M. sinensis							2011-05-11				China	Jiangsu	Wuxi										31.3457	119.684	22
	PMS-300	M. sinensis						2011-04-19	2012-06-26				China	Zhejiang	Huzhou										30.8744	120.145	10
	PMS-303	M. sinensis						2011-04-19	2012-06-26				China	Zhejiang	Fuyang										30.1034	119.94	10
	PMS-306	M. sinensis							2010-06-28				China	Zhejiang	Fuyang			6		6			1		29.8918	119.842	20
	PMS-314	M. sinensis							2011-05-11				China	Fujian	Ningde			5		4			1		26.5279	119.632	279
	PMS-339	M. sinensis							2011-05-11				China	Jiangxi	Ruijin										25.6614	115.816	180
	PMS-347	M. sinensis							2010-06-28				China	Guangdong	Xingning										24.168	115.884	286
	PMS-351	M. sinensis						2011-04-19	2012-06-26				China	Guangdong	Wuhua			4							24.0724	115.626	128
	PMS-359	M. sinensis						2011-04-19	2012-06-26				China	Guangdong	Yunfu			3		3			1		22.9134	112.337	20
	PMS-375	M. sinensis						2011-04-19	2012-06-26				China	Hainan	Ding'an			2		2			1		19.6304	110.291	84
	PMS-381	M. sinensis						2011-04-19	2012-06-26				China	Hainan	Wuzhishan										19.0098	109.646	343
	PMS-382	M. sinensis						2011-04-19	2012-06-26				China	Hainan	Wuzhishan			1		1			1		18.9056	109.514	309
	PMS-397	M. sinensis							2010-06-28				China	Guangxi	Liuzhou										24.4048	109.98	164
	PMS-425	M. sinensis						2011-04-19	2012-06-26				China	Hubei	Chibi										29.7184	113.847	46
	PMS-436	M. sinensis						2011-04-19	2012-06-26				China	Liaoning	Benxi										41.317	123.738	183
	PMS-438	M. sinensis						2011-04-19	2012-06-26				China	Liaoning	Benxi			10		10			1		41.3288	123.69	148

## Sheet: Entry List2
Order	Name	Accession ID	Species	POP	Alt ID_1	Country	Perfecture, state, province	City	Location/Site	Lat	Long	Elev (m)	Day-length Set1	Day-length Set2	Groups Consensus
15	M. ×giganteus 'Illinois'	UI10-00107	M. ×giganteus	M. ×giganteus 'Illinois'	UI10-00107								8
19	M. floridulus 'NG77-022'	PI417947	M. floridulus	Miscanthus 'NG77-022'	PI417947	Papua New Guinea				-3.55	143.633	5	12		SE China Msi
16	M. floridulus 'US56-0022-03'	PI230189	M. floridulus	M. floridulus 'US56-0022-03'	PI230189	New Caledonia				-20.91	165.33	10	11		SE China Msi
20	M. sacchariflorus 'Hortico'	UI10-00008	M. sacchariflorus	Miscanthus sacchariflorus 'Hortico'											NE China/Korea/Russia 2x Msa
9	M. sinensis 'EBI-2008-32a'	EBI-2008-32a	M. sinensis	EBI-2008-32	Atsuta	Japan	Hokkaido	Ishikari	Atsuta	43.3931	141.432	32.3088			N Japan Msi
10	M. sinensis 'EBI-2008-51c'	EBI-2008-51c	M. sinensis	EBI-2008-51	Biei ④	Japan	Hokkaido	Biei	Biei ④	43.4482	142.646	907.085	6		N Japan Msi
21	M. sinensis 'Flamingo'	UI10-00041	M. sinensis	Miscanthus sinensis 'Flamingo'									13		C Japan Msi
22	M. sinensis 'Gracillimus'	UI10-00048	M. sinensis	Miscanthus sinensis 'Gracillimus'									15		S Japan Msi
7	M. sinensis 'Koike-11a'	Koike-11a	M. sinensis	Koike-11		Japan	Niigata	Sado		38	138.36	100			C Japan Msi
5	M. sinensis 'Koike-12b'	Koike-12b	M. sinensis	Koike-12		Japan	Toyama	Gofuku		36.7	137.19	80	5		C Japan Msi
4	M. sinensis 'Koike-21c'	Koike-21c	M. sinensis	Koike-21		Japan	Kumamoto	Tama-gun		32.16	130.39	560	3		S Japan Msi
3	M. sinensis 'Miyazaki 1.5'	UI11-00001.5	M. sinensis	Koike-22		Japan				31.83	131.42	30	2		S Japan Msi
17	M. sinensis 'Nippon'	UI10-00074	M. sinensis	M. sinensis 'Nippon'	UI10-00074								9		S Japan Msi
2	M. sinensis 'Onna-1'	OKA-2010-001	M. sinensis	Onna-1	2010-OKA-001	Japan	Okinawa	Onna		26.4459	127.806	48.18	1 alt		SE China Msi
33	M. sinensis 'PMS-130'	PMS-130	M. sinensis			China	Gansu	Longnan		33.4555	105.137	1807		10	Yangtze-Qinling Msi
34	M. sinensis 'PMS-159'	PMS-159	M. sinensis			China	Henan	Sanmenxia		34.1295	111.044	757		11	Yangtze-Qinling Msi
35	M. sinensis 'PMS-161'	PMS-161	M. sinensis			China	Shanxi	Qinshui		35.722	112.325	724		12	Yangtze-Qinling Msi
36	M. sinensis 'PMS-164'	PMS-164	M. sinensis			China	Hebei	Xingtai		37.34	114.281	360		13	Yangtze-Qinling Msi
32	M. sinensis 'PMS-204'	PMS-204	M. sinensis			China	Henan	Xinyang		31.7013	114.874	103		9	Yangtze-Qinling Msi
29	M. sinensis 'PMS-226'	PMS-226	M. sinensis			China	Guizhou	Guiyang		26.6206	106.751	1133		6	Sichuan Msi
30	M. sinensis 'PMS-306'	PMS-306	M. sinensis			China	Zhejiang	Fuyang		29.8918	119.842	20		7	Yangtze-Qinling Msi
28	M. sinensis 'PMS-314'	PMS-314	M. sinensis			China	Fujian	Ningde		26.5279	119.632	279		5	Yangtze-Qinling Msi
27	M. sinensis 'PMS-347'	PMS-347	M. sinensis			China	Guangdong	Xingning		24.168	115.884	286		4	SE China Msi
26	M. sinensis 'PMS-359'	PMS-359	M. sinensis			China	Guangdong	Yunfu		22.9134	112.337	20		3	SE China Msi
25	M. sinensis 'PMS-375'	PMS-375	M. sinensis			China	Hainan	Ding'an		19.6304	110.291	84		2	SE China Msi
24	M. sinensis 'PMS-382'	PMS-382	M. sinensis			China	Hainan	Wuzhishan		18.9056	109.514	309		1	SE China Msi
37	M. sinensis 'PMS-436'	PMS-436	M. sinensis			China	Liaoning	Benxi		41.317	123.738	183		14	Korea, N China Msi
38	M. sinensis 'PMS-438'	PMS-438	M. sinensis			China	Liaoning	Benxi		41.3288	123.69	148		15	Korea, N China Msi
6	M. sinensis 'Sugadaira 2.4'	UI11-00002.4	M. sinensis	Koike-25		Japan				36	138.12	1120	4		C Japan Msi
11	M. sinensis 'Teshio 3.3'	UI11-00003.3	M. sinensis	Koike-1		Japan				44.9167	141.983	100	7		N Japan Msi
8	M. sinensis 'Tōhoku-2010-015a'	Tōhoku-2010-015a	M. sinensis	Tōhoku-2010-015		Japan	Akita	Noshiroshi	Futatsuimachitane	40.216	140.226	19.6			N Japan Msi
1	M. sinensis 'Uruma-1b'	OKA-2010-002	M. sinensis	Uruma-1	2010-OKA-002	Japan	Okinawa	Uruma		26.3403	127.855	5.703	1		SE China Msi
18	M. sinensis var. condensatus 'Cabaret'	UI10-00012	M. sinensis	M. sinensis var. condensatus 'Cabaret'	UI10-00012	Japan							10		C Japan Msi
31	M. sinensis x M. sacchariflorus 2x 'PMS-300'	PMS-300	M. sinensis			China	Zhejiang	Huzhou		30.8744	120.145	10		8
43	S bicolor 'SM100'	PI 598103	S. bicolor		ma1Ma2Ma3Ma4
12	S. bicolor '100M'	PI 598085	S. bicolor		Ma1Ma2Ma3Ma4
41	S. bicolor '38M'	PI 598097	S. bicolor		ma1ma2ma3RMa4
14	S. bicolor '58M'	PI 598093	S. bicolor		Ma1Ma2ma3RMa4

## Sheet: Data
Accession ID	Name	Accession ID	Expt #	Chamber	Day Length (hr)	Date cut to 5 cm & Trtmt started	Plant # (new)	Plant # (old)	Species	Alt ID_1	Country	Perfecture, state, province	City	Location/Site	Priority for use in growth chamber study	Lat	Long	Elev (m)	1st flag leaf 2011	1st booting date 2011	1st heading date 2011	1st flowering date 2011	50% heading date 2011	50% flowering date 2011	# days to 1st flag leaf 2011	# days to 1st booting date 2011	# days to 1st heading date 2011	# days to 1st flowering date 2011	# days to 50% heading date 2011	# days to 50% flowering date 2011	Total #shoots at end	# of reproductive shoots at end	Culm length 1 (cm)	Culm length base to top collar 1 (cm)	# leaves 1	Culm length 2 (cm)	Culm length base to top collar 2 (cm)	# leaves 2	Culm length 3 (cm)	Culm length base to top collar 3 (cm)	# leaves3	Avg culm length per pot (cm)	Avg culm length to top collar per pot (cm)	Avg # leaves per stem	Notes
PI 598085	S. bicolor '100M'	PI 598085	1	2	10	2012-08-27	54	152-old	S. bicolor	Ma1Ma2Ma3Ma4									2012-10-10	2012-10-10	2012-10-12	2012-10-17			44	44	46	51			11	6	64.1	38.8	9	93.6	59	6	77	45.8	6	78.2333	47.8667	7
PI 598085	S. bicolor '100M'	PI 598085	1	2	10	2012-08-27	56	153-old	S. bicolor	Ma1Ma2Ma3Ma4									2012-10-10	2012-10-10	2012-10-15	2012-10-19			44	44	49	53			12	5	86.9	56	7	92.2	60.9	18	73.1	45.5	9	84.0667	54.1333	11.3333
PI 598085	S. bicolor '100M'	PI 598085	2	2	12.5	2014-01-20	175	49	S. bicolor	Ma1Ma2Ma3Ma4									2014-03-21	2014-03-24	2014-03-28	2014-04-04	2014-04-18	2014-04-25	60	63	67	74	88	95	10	8	108	57	6	116	54	6	115	60	7	113	57	6.33333
PI 598085	S. bicolor '100M'	PI 598085	2	2	12.5	2014-01-20	176	50	S. bicolor	Ma1Ma2Ma3Ma4									2014-03-24	2014-03-31	2014-04-04	2014-04-07	2014-04-21	2014-04-25	63	70	74	77	91	95	27	10	125	80	6	138	82	15	126	78	14	129.667	80	11.6667
PI 598085	S. bicolor '100M'	PI 598085	2	2	12.5	2014-01-20	177	51	S. bicolor	Ma1Ma2Ma3Ma4									2014-03-17	2014-03-21	2014-03-28	2014-03-28	2014-04-07	2014-04-11	56	60	67	67	77	81	19	7	110	49	8	119	78	7	112	70	10	113.667	65.6667	8.33333
PI 598085	S. bicolor '100M'	PI 598085	1	1	15	2012-08-27	117	151-old	S. bicolor	Ma1Ma2Ma3Ma4									2013-02-15	2013-03-01	2013-03-01	2013-03-06			172	186	186	191			5	4	45.5	22.4	16	48.1	22.9	14	58.8	36.2	24	50.8	27.1667	18
PI 598085	S. bicolor '100M'	PI 598085	1	1	15	2012-08-27	119	154-old	S. bicolor	Ma1Ma2Ma3Ma4									2013-01-23	2013-01-25	2013-01-28	2013-02-01			149	151	154	158			5	3	115	69.7	10	120.1	88.3	22	95.7	50	9	110.267	69.3333	13.6667
PI 598085	S. bicolor '100M'	PI 598085	2	1	15	2014-01-20	231	109	S. bicolor	Ma1Ma2Ma3Ma4									2014-04-29	2014-05-02	2014-05-06	2014-05-06	2014-05-27	2014-05-27	99	102	106	106	127	127	5	4	130	76	11	118	59	13	101	44	12	116.333	59.6667	12
PI 598085	S. bicolor '100M'	PI 598085	2	1	15	2014-01-20	232	110	S. bicolor	Ma1Ma2Ma3Ma4									2014-05-09	2014-05-16	2014-05-19	2014-05-27	2014-06-06	2014-06-09	109	116	119	127	137	140	5	3	111	80	12	120	58	11	124	42	13	118.333	60	12
PI 598085	S. bicolor '100M'	PI 598085	2	1	15	2014-01-20	233	111	S. bicolor	Ma1Ma2Ma3Ma4									2014-04-25	2014-05-02	2014-05-06	2014-05-09	2014-05-16	2014-05-19	95	102	106	109	116	119	3	2	93	43	9	115	71	12	134	92	11	114	68.6667	10.6667
PI 598085	S. bicolor '100M-new'	PI 598085	1	2	10	2012-08-27	53	152-new	S. bicolor	Ma1Ma2Ma3Ma4									2012-11-05	2012-11-12	2012-11-14	2012-11-16			70	77	79	81			2	2	74.1	44.5	8	93.2	55.2	8				55.7667	33.2333	5.33333	Only two shoots were present.
PI 598085	S. bicolor '100M-new'	PI 598085	1	2	10	2012-08-27	55	153-new	S. bicolor	Ma1Ma2Ma3Ma4									2012-11-12	2012-11-14	2012-11-16	2012-11-19			77	79	81	84			3	1	67.8	37.8	6	51.5	14.3	7	46.4	13.1	11	55.2333	21.7333	8
PI 598085	S. bicolor '100M-new'	PI 598085	1	1	15	2012-08-27	116	151-new	S. bicolor	Ma1Ma2Ma3Ma4									2013-03-18	2013-03-25	2013-04-01	2013-04-03			203	210	217	219			5	2	127.5	72.8	10	119.1	45.5	10	43.6	11.3	4	96.7333	43.2	8
PI 598085	S. bicolor '100M-new'	PI 598085	1	1	15	2012-08-27	118	154-new	S. bicolor	Ma1Ma2Ma3Ma4									2013-05-29	2013-06-06	2013-06-10	2013-06-13			275	283	287	290			2	0	58.1	17	10	78.9	27.6	14				45.6667	14.8667	8	Only two new shoots were present.
PI 598097	S. bicolor '38M'	PI 598097	1	2	10	2012-08-27	58	157-old	S. bicolor	ma1ma2ma3RMa4									2012-10-10	2012-10-10	2012-10-15	2012-10-22			44	44	49	56			10	6	118.3	77	10	185.4	138.3	22	123.5	83	9	142.4	99.4333	13.6667
PI 598097	S. bicolor '38M'	PI 598097	1	2	10	2012-08-27	60	158-old	S. bicolor	ma1ma2ma3RMa4									2012-10-17	2012-10-19	2012-10-26	2012-10-29			51	53	60	63			5	3	150	112.2	12	137.4	87.4	6				95.8	66.5333	6	The other shoots had broken, so an accurate measurment was not possible.
PI 598097	S. bicolor '38M'	PI 598097	2	2	12.5	2014-01-20	178	52	S. bicolor	ma1ma2ma3RMa4									2014-03-14	2014-03-21	2014-03-21	2014-03-24	2014-03-21	2014-03-28	53	60	60	63	60	67	22	16	157	116	10	154	120	7	174	135	11	161.667	123.667	9.33333
PI 598097	S. bicolor '38M'	PI 598097	2	2	12.5	2014-01-20	179	53	S. bicolor	ma1ma2ma3RMa4									2014-02-28	2014-02-28	2014-03-03	2014-03-10	2014-03-03	2014-03-10	39	39	42	49	42	49	18	11	160	99	10	126	87	7	160	112	6	148.667	99.3333	7.66667
PI 598097	S. bicolor '38M'	PI 598097	2	2	12.5	2014-01-20	180	54	S. bicolor	ma1ma2ma3RMa4									2014-03-14	2014-03-21	2014-03-21	2014-03-28	2014-03-28	2014-04-07	53	60	60	67	67	77	23	17	153	107	6	148	83	7	132	70	6	144.333	86.6667	6.33333
PI 598097	S. bicolor '38M'	PI 598097	1	1	15	2012-08-27	122	160-old	S. bicolor	ma1ma2ma3RMa4									2012-10-15	2012-10-17	2012-10-22	2012-10-24			49	51	56	58			9	2	132.9	78.2	11	148.2	100.8	24	114.1	63.1	11	131.733	80.7	15.3333
PI 598097	S. bicolor '38M'	PI 598097	2	1	15	2014-01-20	234	112	S. bicolor	ma1ma2ma3RMa4									2014-02-24	2014-03-03	2014-05-09	2014-03-03	2014-03-10	2014-03-10	35	42	109	42	49	49	1	1	148	101	8							49.3333	33.6667	2.66667
PI 598097	S. bicolor '38M'	PI 598097	2	1	15	2014-01-20	235	113	S. bicolor	ma1ma2ma3RMa4									2014-02-24	2014-03-03	2014-03-03	2014-03-10	2014-03-10	2014-03-14	35	42	42	49	49	53	3	3	151	107	10	124	77	5	152	103	9	142.333	95.6667	8
PI 598097	S. bicolor '38M'	PI 598097	2	1	15	2014-01-20	236	114	S. bicolor	ma1ma2ma3RMa4									2014-02-24	2014-03-03	2014-03-03	2014-03-10	2014-03-10	2014-03-14	35	42	42	49	49	53	3	3	140	95	9	128	85	5	129	77	7	132.333	85.6667	7
PI 598097	S. bicolor '38M-new'	PI 598097	1	2	10	2012-08-27	57	157-new	S. bicolor	ma1ma2ma3RMa4									2012-11-19	2012-11-23	2012-11-26	2012-12-03			84	88	91	98			1	0	59.4	35.9	7							19.8	11.9667	2.33333	Only one shoot was present.
PI 598097	S. bicolor '38M-new'	PI 598097	1	2	10	2012-08-27	59	158-new	S. bicolor	ma1ma2ma3RMa4									2012-10-12	2012-10-10	2012-10-17	2012-10-19			46	44	51	53			7	2	88.6	49.4	6	101.8	61	7	106.2	73.5	8	98.8667	61.3	7
PI 598097	S. bicolor '38M-new'	PI 598097	1	1	15	2012-08-27	120	159-new	S. bicolor	ma1ma2ma3RMa4									2012-10-10	2012-10-10	2012-10-15	2012-10-19			44	44	49	53			8	3	168.6	122.2	22	134.8	89.3	22	120.3	53.6	6	141.233	88.3667	16.6667
PI 598097	S. bicolor '38M-new'	PI 598097	1	1	15	2012-08-27	121	160-new	S. bicolor	ma1ma2ma3RMa4									2012-10-15	2012-10-17	2012-10-22	2012-10-24			49	51	56	58			7	4	115.5	76.5	6	115.3	78.5	17	92.2	34.4	5	107.667	63.1333	9.33333
PI 598093	S. bicolor '58M'	PI 598093	1	2	10	2012-08-27	62	163-old	S. bicolor	Ma1Ma2ma3RMa4									2012-10-12	2012-10-15	2012-10-17	2012-10-19			46	49	51	53			11	4	81.4	40.8	11	147.9	106.2	11	105.5	66	6	111.6	71	9.33333
PI 598093	S. bicolor '58M'	PI 598093	1	2	10	2012-08-27	64	164-old	S. bicolor	Ma1Ma2ma3RMa4									2012-10-12	2012-10-15	2012-10-17	2012-10-22			46	49	51	56			9	6	143.1	92.7	8	132.6	92	9	92.9	59.8	7	122.867	81.5	8
PI 598093	S. bicolor '58M'	PI 598093	1	1	15	2012-08-27	124	165-old	S. bicolor	Ma1Ma2ma3RMa4									2012-09-22	2012-09-22	2012-09-22	2012-09-22			26	26	26	26			16	6	118.7	90.3	15	145.1	111.6	28	91.7	35.7	6	118.5	79.2	16.3333
PI 598093	S. bicolor '58M'	PI 598093	1	1	15	2012-08-27	126	166-old	S. bicolor	Ma1Ma2ma3RMa4									2012-10-15	2012-10-17	2012-10-22	2012-10-24			49	51	56	58			17	4	98	60.5	13	136.4	95.6	12	142.8	95	10	125.733	83.7	11.6667
PI 598093	S. bicolor '58M-new'	PI 598093	1	2	10	2012-08-27	61	163-new	S. bicolor	Ma1Ma2ma3RMa4									2012-10-17	2012-10-17	2012-10-22	2012-10-26			51	51	56	60			4	1	54.6	12	7	111.6	62.8	6	88.3	55	7	84.8333	43.2667	6.66667
PI 598093	S. bicolor '58M-new'	PI 598093	1	2	10	2012-08-27	63	164-new	S. bicolor	Ma1Ma2ma3RMa4									2012-10-26	2012-10-29	2012-10-31	2012-11-05			60	63	65	70			3	3	129.1	86.5	8	75.5	47	9	93.7	62.1	10	99.4333	65.2	9
PI 598093	S. bicolor '58M-new'	PI 598093	1	1	15	2012-08-27	123	165-new	S. bicolor	Ma1Ma2ma3RMa4									2012-10-15	2012-10-17	2012-10-22	2012-10-24			49	51	56	58			11	3	129.7	82.8	10	172.2	148.7	9	98.3	69.7	14	133.4	100.4	11
PI 598093	S. bicolor '58M-new'	PI 598093	1	1	15	2012-08-27	125	166-new	S. bicolor	Ma1Ma2ma3RMa4									2012-10-22	2012-10-26	2012-10-29	2012-10-31			56	60	63	65			6	4	129.9	84.4	10	71.1	35.6	8	68.2	26.8	7	89.7333	48.9333	8.33333
EBI-2008-32a	M. sinensis 'EBI-2008-32a'	EBI-2008-32a	1	2	10	2012-08-27	1	1	M. sinensis	Atsuta	Japan	Hokkaido	Ishikari	Atsuta	11	43.3931	141.432	32.3088													90	0	66	11.4	5	70.5	15.4	7	69	13.4	8	68.5	13.4	6.66667
EBI-2008-32a	M. sinensis 'EBI-2008-32a'	EBI-2008-32a	1	2	10	2012-08-27	2	2	M. sinensis	Atsuta	Japan	Hokkaido	Ishikari	Atsuta	11	43.3931	141.432	32.3088													88	0	73	17.3	7	71.2	17.6	8	73.2	17.5	8	72.4667	17.4667	7.66667
EBI-2008-32a	M. sinensis 'EBI-2008-32a'	EBI-2008-32a	1	2	10	2012-08-27	3	3	M. sinensis	Atsuta	Japan	Hokkaido	Ishikari	Atsuta	11	43.3931	141.432	32.3088													55	0	43.4	13.6	13	64.5	14.3	6	57.5	11.5	6	55.1333	13.1333	8.33333
EBI-2008-32a	M. sinensis 'EBI-2008-32a'	EBI-2008-32a	3	1	12.5	2015-06-15	288	101	M. sinensis	Atsuta	Japan	Hokkaido	Ishikari	Atsuta	11	43.3931	141.432	32.3088													76	0	98.2	20	10	87.8	17.5	10	73	18.2	13	86.3333	18.5667	11
EBI-2008-32a	M. sinensis 'EBI-2008-32a'	EBI-2008-32a	3	1	12.5	2015-06-15	289	102	M. sinensis	Atsuta	Japan	Hokkaido	Ishikari	Atsuta	11	43.3931	141.432	32.3088													82	0	81.3	17.5	8	71.5	18.3	9	71.5	15	10	74.7667	16.9333	9
EBI-2008-32a	M. sinensis 'EBI-2008-32a'	EBI-2008-32a	3	1	12.5	2015-06-15	290	103	M. sinensis	Atsuta	Japan	Hokkaido	Ishikari	Atsuta	11	43.3931	141.432	32.3088													85	0	82.5	14	7	84	13.2	8	83	21.7	10	83.1667	16.3	8.33333
EBI-2008-32a	M. sinensis 'EBI-2008-32a'	EBI-2008-32a	1	1	15	2012-08-27	65	4	M. sinensis	Atsuta	Japan	Hokkaido	Ishikari	Atsuta	11	43.3931	141.432	32.3088	2012-10-31	2012-11-09	2012-11-23	2012-11-26	2012-11-28	2012-12-03	65	74	88	91	93	98	38	6	262.4	214.5	21	259.8	214.8	18	233.4	151.3	20	251.867	193.533	19.6667
EBI-2008-32a	M. sinensis 'EBI-2008-32a'	EBI-2008-32a	1	1	15	2012-08-27	66	5	M. sinensis	Atsuta	Japan	Hokkaido	Ishikari	Atsuta	11	43.3931	141.432	32.3088	2012-10-29	2012-11-07	2012-11-19	2012-11-26	2013-01-04	2013-01-09	63	72	84	91	130	135	31	11	232.6	190.7	20	208.5	169.9	11	254	200.9	15	231.7	187.167	15.3333
EBI-2008-32a	M. sinensis 'EBI-2008-32a'	EBI-2008-32a	1	1	15	2012-08-27	67	6	M. sinensis	Atsuta	Japan	Hokkaido	Ishikari	Atsuta	11	43.3931	141.432	32.3088	2012-10-12	2012-10-19	2012-10-29	2012-11-02	2012-12-03	2012-12-12	46	53	63	67	98	107	30	11	259	219.3	18	249.5	221	17	263.8	225.9	16	257.433	222.067	17
EBI-2008-51c	M. sinensis 'EBI-2008-51c'	EBI-2008-51c	1	2	10	2012-08-27	4	7	M. sinensis	Biei ④	Japan	Hokkaido	Biei	Biei ④	11 high	43.4482	142.646	907.085													71	0	70.2	18.1	5	66.8	15.7	7	66.5	15.2	9	67.8333	16.3333	7
EBI-2008-51c	M. sinensis 'EBI-2008-51c'	EBI-2008-51c	1	2	10	2012-08-27	5	13	M. sinensis	Biei ④	Japan	Hokkaido	Biei	Biei ④	11 high	43.4482	142.646	907.085													78	0	73.2	15.2	8	70.3	15.8	6	77.6	24.4	8	73.7	18.4667	7.33333
EBI-2008-51c	M. sinensis 'EBI-2008-51c'	EBI-2008-51c	3	1	12.5	2015-06-15	291	104	M. sinensis	Biei ④	Japan	Hokkaido	Biei	Biei ④	11 high	43.4482	142.646	907.085													63	0	68.5	11.3	7	57.5	8	6	51	9.4	8	59	9.56667	7
EBI-2008-51c	M. sinensis 'EBI-2008-51c'	EBI-2008-51c	3	1	12.5	2015-06-15	292	105	M. sinensis	Biei ④	Japan	Hokkaido	Biei	Biei ④	11 high	43.4482	142.646	907.085	2015-07-13	2015-07-13	2015-07-20	2015-07-27	2015-07-27	2015-07-27	28	28	35	42	42	42	48	5	132.3	102.7	7	134.1	101	5	129.1	79.1	8	131.833	94.2667	6.66667
EBI-2008-51c	M. sinensis 'EBI-2008-51c'	EBI-2008-51c	3	1	12.5	2015-06-15	293	106	M. sinensis	Biei ④	Japan	Hokkaido	Biei	Biei ④	11 high	43.4482	142.646	907.085	2015-08-03						49						108	1	58	29	4	67.2	11.4	6	63.1	11.6	7	62.7667	17.3333	5.66667
EBI-2008-51c	M. sinensis 'EBI-2008-51c'	EBI-2008-51c	1	1	15	2012-08-27	68	10	M. sinensis	Biei ④	Japan	Hokkaido	Biei	Biei ④	11 high	43.4482	142.646	907.085	2012-10-10	2012-10-17	2012-10-31	2012-11-02	2013-01-21	2013-01-23	44	51	65	67	147	149	30	8	190.2	125.3	15	193	182	15	228.4	168.5	10	203.867	158.6	13.3333
Koike-11a	M. sinensis 'Koike-11a'	Koike-11a	1	2	10	2012-08-27	6	19	M. sinensis		Japan	Niigata	Sado		7	38	138.36	100													65	0	79.4	18.1	8	79.3	16	7	86.2	17.9	7	81.6333	17.3333	7.33333
Koike-11a	M. sinensis 'Koike-11a'	Koike-11a	1	2	10	2012-08-27	7	20	M. sinensis		Japan	Niigata	Sado		7	38	138.36	100	2012-10-05						39						92	0	50.7	10.5	6	67.5	9	6	73.5	11.3	8	63.9	10.2667	6.66667
Koike-11a	M. sinensis 'Koike-11a'	Koike-11a	1	2	10	2012-08-27	8	21	M. sinensis		Japan	Niigata	Sado		7	38	138.36	100													100	0	77.6	11.3	11	69	13.2	7	68.2	12.1	8	71.6	12.2	8.66667
Koike-11a	M. sinensis 'Koike-11a'	Koike-11a	3	1	12.5	2015-06-15	294	107	M. sinensis		Japan	Niigata	Sado		7	38	138.36	100													106	0	102.2	37	13	100.3	41.4	18	108.7	45.2	15	103.733	41.2	15.3333
Koike-11a	M. sinensis 'Koike-11a'	Koike-11a	3	1	12.5	2015-06-15	295	108	M. sinensis		Japan	Niigata	Sado		7	38	138.36	100													52	0	70.5	18	8	94.2	21.3	7	86.5	18.2	10	83.7333	19.1667	8.33333
Koike-11a	M. sinensis 'Koike-11a'	Koike-11a	3	1	12.5	2015-06-15	296	109	M. sinensis		Japan	Niigata	Sado		7	38	138.36	100													97	0	90.5	30	13	99	38.8	15	95.3	38	12	94.9333	35.6	13.3333
Koike-11a	M. sinensis 'Koike-11a'	Koike-11a	1	1	15	2012-08-27	69	22	M. sinensis		Japan	Niigata	Sado		7	38	138.36	100	2012-12-05	2012-12-28	2013-01-07	2013-01-09	2013-01-14	2013-01-16	100	123	133	135	140	142	30	22	167.5	104.3	21	177.6	120.5	10	183.5	134.3	13	176.2	119.7	14.6667
Koike-11a	M. sinensis 'Koike-11a'	Koike-11a	1	1	15	2012-08-27	70	23	M. sinensis		Japan	Niigata	Sado		7	38	138.36	100	2012-10-29	2012-11-12	2012-12-10	2012-12-12	2013-01-11	2013-01-14	63	77	105	107	137	140	40	9	190	139.9	14	182.4	134.4	9	196	129.3	23	189.467	134.533	15.3333
Koike-11a	M. sinensis 'Koike-11a'	Koike-11a	1	1	15	2012-08-27	71	24	M. sinensis		Japan	Niigata	Sado		7	38	138.36	100	2012-12-03	2012-12-28	2013-01-09	2013-01-11	2013-01-25	2013-01-28	98	123	135	137	151	154	46	10	198.7	142.2	10	194.7	140.3	11	180.5	125.2	12	191.3	135.9	11
Koike-12b	M. sinensis 'Koike-12b'	Koike-12b	1	2	10	2012-08-27	9	25	M. sinensis		Japan	Toyama	Gofuku		6	36.7	137.19	80													129	0	67.2	13.1	7	68.6	12.2	6	69.1	11.6	6	68.3	12.3	6.33333
Koike-12b	M. sinensis 'Koike-12b'	Koike-12b	3	1	12.5	2015-06-15	297	110	M. sinensis		Japan	Toyama	Gofuku		6	36.7	137.19	80													129	0	110	45.9	15	83.6	29.6	16	86.3	26.6	12	93.3	34.0333	14.3333
Koike-12b	M. sinensis 'Koike-12b'	Koike-12b	3	1	12.5	2015-06-15	298	111	M. sinensis		Japan	Toyama	Gofuku		6	36.7	137.19	80													98	0	90.2	22.5	10	81.5	20.1	9	89.2	17.5	7	86.9667	20.0333	8.66667
Koike-12b	M. sinensis 'Koike-12b'	Koike-12b	3	1	12.5	2015-06-15	299	112	M. sinensis		Japan	Toyama	Gofuku		6	36.7	137.19	80													112	0	99.5	27.6	10	91.3	28.5	13	95.3	31.3	12	95.3667	29.1333	11.6667
Koike-12b	M. sinensis 'Koike-12b'	Koike-12b	1	1	15	2012-08-27	72	28	M. sinensis		Japan	Toyama	Gofuku		6	36.7	137.19	80	2012-11-28	2012-12-03	2012-12-31	2013-01-04	2013-01-16	2013-01-18	93	98	126	130	142	144	39	14	173.7	120.1	9	177.9	144.6	15	181.7	142.8	12	177.767	135.833	12
Koike-21c	M. sinensis 'Koike-21c'	Koike-21c	1	2	10	2012-08-27	10	31	M. sinensis		Japan	Kumamoto	Tama-gun		4 high	32.16	130.39	560	2012-10-05						39						52	0	96	27.5	11	93.9	23.6	7	96.1	29.3	12	95.3333	26.8	10
Koike-21c	M. sinensis 'Koike-21c'	Koike-21c	1	2	10	2012-08-27	11	32	M. sinensis		Japan	Kumamoto	Tama-gun		4 high	32.16	130.39	560	2012-10-05						39						55	0	100.8	32	16	95.7	20.5	9	95.5	20.3	7	97.3333	24.2667	10.6667
Koike-21c	M. sinensis 'Koike-21c'	Koike-21c	1	2	10	2012-08-27	12	33	M. sinensis		Japan	Kumamoto	Tama-gun		4 high	32.16	130.39	560	2012-10-05	2012-10-05	2012-10-10	2012-10-15			39	39	44	49			70	2	142.5	66.3	22	128.8	51.2	17	135.1	60.5	14	135.467	59.3333	17.6667
Koike-21c	M. sinensis 'Koike-21c'	Koike-21c	3	1	12.5	2015-06-15	300	113	M. sinensis		Japan	Kumamoto	Tama-gun		4 high	32.16	130.39	560	2015-07-27	2015-08-03	2015-08-17	2015-08-24	2015-08-24	2015-08-24	42	49	63	70	70	70	99	5	155.2	117	7	110.8	96	8	185	110.5	21	150.333	107.833	12
Koike-21c	M. sinensis 'Koike-21c'	Koike-21c	3	1	12.5	2015-06-15	301	114	M. sinensis		Japan	Kumamoto	Tama-gun		4 high	32.16	130.39	560	2015-07-27	2015-07-27	2015-08-03	2015-08-03	2015-08-17	2015-08-17	42	42	49	49	63	63	87	6	123.2	76.4	7	129.5	94.5	7	202.3	106.1	15	151.667	92.3333	9.66667
Koike-21c	M. sinensis 'Koike-21c'	Koike-21c	3	1	12.5	2015-06-15	302	115	M. sinensis		Japan	Kumamoto	Tama-gun		4 high	32.16	130.39	560	2015-08-03	2015-08-10	2015-08-17	2015-08-17	2015-08-24	2015-08-24	49	56	63	63	70	70	80	3	221.9	129.1	27	202.3	123.1	27	200.7	119.3	27	208.3	123.833	27
Koike-21c	M. sinensis 'Koike-21c'	Koike-21c	1	1	15	2012-08-27	73	34	M. sinensis		Japan	Kumamoto	Tama-gun		4 high	32.16	130.39	560	2012-12-28	2013-01-11	2013-02-15	2013-02-22	2013-03-15	2013-03-18	123	137	172	179	200	203	35	14	193.2	106.3	19	182.5	97.6	20	150.8	59.4	12	175.5	87.7667	17
Koike-21c	M. sinensis 'Koike-21c'	Koike-21c	1	1	15	2012-08-27	74	35	M. sinensis		Japan	Kumamoto	Tama-gun		4 high	32.16	130.39	560	2012-12-28	2013-01-11	2013-02-08	2013-02-15	2013-03-01	2013-03-06	123	137	165	172	186	191	44	16	181.8	93.5	17	188.9	95.1	16	196.1	141.9	16	188.933	110.167	16.3333
Koike-21c	M. sinensis 'Koike-21c'	Koike-21c	1	1	15	2012-08-27	75	36	M. sinensis		Japan	Kumamoto	Tama-gun		4 high	32.16	130.39	560	2012-11-14	2013-01-09	2013-01-11	2013-01-16	2013-02-08	2013-02-15	79	135	137	142	165	172	46	18	188.5	137.7	15	201.9	108.5	17	189.6	130.3	19	193.333	125.5	17
UI10-00107	M. ×giganteus 'Illinois'	UI10-00107	1	2	10	2012-08-27	41	127	M. ×giganteus	UI10-00107																					20	0	61.2	16.1	6	55.8	14.6	4	40.2	12	4	52.4	14.2333	4.66667	Old dead and live shoots had very short internodes.
UI10-00107	M. ×giganteus 'Illinois'	UI10-00107	1	2	10	2012-08-27	42	128	M. ×giganteus	UI10-00107																					34	0	73.9	20.2	6	60.7	17.7	4	66.9	19.1	5	67.1667	19	5	Old dead and live shoots had very short internodes.
UI10-00107	M. ×giganteus 'Illinois'	UI10-00107	1	2	10	2012-08-27	43	129	M. ×giganteus	UI10-00107																					28	0	49.4	16.3	7	62.7	19.1	4	62.9	18.9	6	58.3333	18.1	5.66667	Old dead and live shoots had very short internodes.
UI10-00107	M. ×giganteus 'Illinois'	UI10-00107	3	2	10	2015-06-15	240	1	M. ×giganteus										2015-08-24	2015-08-31	2015-08-31	2015-08-31	2015-09-08		70	77	77	77			36	5	101.6	84.1	30	100.2	89	33	101.2	84.2	30	101	85.7667	31
UI10-00107	M. ×giganteus 'Illinois'	UI10-00107	3	2	10	2015-06-15	241	2	M. ×giganteus										2015-11-16						154						32	≥1	113.6	86.7	31	115.5	85.1	29	88	82.7	39	105.7	84.8333	33
UI10-00107	M. ×giganteus 'Illinois'	UI10-00107	3	2	10	2015-06-15	242	3	M. ×giganteus										2015-08-03	2015-09-08	2015-09-08	2015-10-12	2015-10-12		49	85	85	119	119		37	6	84.3	77.5	37	92	86.4	35	94.1	86.2	26	90.1333	83.3667	32.6667
UI10-00107	M. ×giganteus 'Illinois'	UI10-00107	2	2	12.5	2014-01-20	127	1	M. ×giganteus										2014-03-21	2014-03-24	2014-04-04	2014-04-07			60	63	74	77			68	11	223	191	18	197	167	15	184	149	16	201.333	169	16.3333
UI10-00107	M. ×giganteus 'Illinois'	UI10-00107	2	2	12.5	2014-01-20	128	2	M. ×giganteus										2014-03-07	2014-03-10	2014-03-10	2014-03-14			46	49	49	53			37	2	202	159	23	144	89	23	177	137	20	174.333	128.333	22
UI10-00107	M. ×giganteus 'Illinois'	UI10-00107	2	2	12.5	2014-01-20	129	3	M. ×giganteus										2014-03-07	2014-03-10	2014-03-14	2014-03-17	2014-08-08	2014-08-08	46	49	53	56	200	200	56	7	215	187	22	234	196	13	244	216	18	231	199.667	17.6667
UI10-00107	M. ×giganteus 'Illinois'	UI10-00107	3	1	12.5	2015-06-15	327	146	M. ×giganteus	UI10-00107									2015-08-24	2015-08-24	2015-08-31	2015-08-31	2015-09-14	2015-09-14	70	70	77	77	91	91	38	11	110.5	80	14	107.9	81	14	116.3	104.2	23	111.567	88.4	17
UI10-00107	M. ×giganteus 'Illinois'	UI10-00107	3	1	12.5	2015-06-15	328	147	M. ×giganteus	UI10-00107									2015-07-27	2015-08-17	2015-08-17	2015-08-17	2015-09-08	2015-09-14	42	63	63	63	85	91	41	9	115.6	90.4	11	120.9	107.5	27	142.3	131.1	32	126.267	109.667	23.3333
UI10-00107	M. ×giganteus 'Illinois'	UI10-00107	3	1	12.5	2015-06-15	329	148	M. ×giganteus	UI10-00107									2015-07-27	2015-09-08	2015-09-21	2015-09-21	2015-09-28	2015-09-28	42	85	98	98	105	105	30	10	163.8	145.7	22	174.1	137.6	17	193.1	169.7	28	177	151	22.3333
UI10-00107	M. ×giganteus 'Illinois'	UI10-00107	1	1	15	2012-08-27	104	130	M. ×giganteus	UI10-00107									2013-01-04	2013-01-09	2013-01-11	2013-01-23	2013-03-18	2013-03-29	130	135	137	149	203	214	24	6	140.4	88.7	22	144.3	105	13	150.1	112.6	13	144.933	102.1	16
UI10-00107	M. ×giganteus 'Illinois'	UI10-00107	1	1	15	2012-08-27	105	131	M. ×giganteus	UI10-00107									2013-01-02	2013-01-07	2013-01-11	2013-01-16			128	133	137	142			28	4	129.5	91.2	11	141.1	101.7	13	153.6	118.8	17	141.4	103.9	13.6667
UI10-00107	M. ×giganteus 'Illinois'	UI10-00107	1	1	15	2012-08-27	106	132	M. ×giganteus	UI10-00107									2013-01-30	2013-02-08	2013-02-15	2013-03-29			156	165	172	214			24	3	131.5	92.5	16	130.4	73	20	168.9	140.7	22	143.6	102.067	19.3333
UI10-00107	M. ×giganteus 'Illinois'	UI10-00107	2	1	15	2014-01-20	183	61	M. ×giganteus										2014-05-19	2014-05-27	2014-05-27	2014-06-09	2014-06-16	2014-06-20	119	127	127	140	147	151	14	4	268	178	13	225	156	13	220	170	12	237.667	168	12.6667
UI10-00107	M. ×giganteus 'Illinois'	UI10-00107	2	1	15	2014-01-20	184	62	M. ×giganteus										2014-05-19	2014-05-12	2014-05-19	2014-06-09	2014-07-11	2014-07-18	119	112	119	140	172	179	44	13	285	189	16	283	188	19	295	234	16	287.667	203.667	17
UI10-00107	M. ×giganteus 'Illinois'	UI10-00107	2	1	15	2014-01-20	185	63	M. ×giganteus										2014-04-25	2014-05-23	2014-05-27	2014-06-09	2014-06-16	2014-06-20	95	123	127	140	147	151	27	13	290	235	18	301	192	16	296	222	21	295.667	216.333	18.3333
PI230189	M. floridulus 'US56-0022-03'	PI230189	1	2	10	2012-08-27	19	67	M. floridulus	PI230189	New Caledonia					-20.91	165.33	10													39	0	190.1	82.1	22	182.3	92.5	22	164.2	76.2	22	178.867	83.6	22
PI230189	M. floridulus 'US56-0022-03'	PI230189	1	2	10	2012-08-27	20	68	M. floridulus	PI230189	New Caledonia					-20.91	165.33	10													29	0	182.6	65.2	20	188	63.5	16	193.1	67.4	17	187.9	65.3667	17.6667
PI230189	M. floridulus 'US56-0022-03'	PI230189	1	2	10	2012-08-27	21	69	M. floridulus	PI230189	New Caledonia					-20.91	165.33	10													27	0	238.8	102	23	224.7	91.5	22	210.8	90	23	224.767	94.5	22.6667
PI230189	M. floridulus 'US56-0022-03'	PI230189	3	1	12.5	2015-06-15	306	122	M. floridulus	PI230189	New Caledonia					-20.91	165.33	10	2015-09-28	2015-10-12	2015-10-12	2015-10-12	2015-11-02	2015-11-09	105	119	119	119	140	147	44	13	233.1	170.9	11	250.1	213.7	16	226.5	186.2	11	236.567	190.267	12.6667
PI230189	M. floridulus 'US56-0022-03'	PI230189	3	1	12.5	2015-06-15	307	123	M. floridulus	PI230189	New Caledonia					-20.91	165.33	10	2015-10-05	2015-10-12	2015-10-12	2015-10-05	2015-11-09	2015-11-16	112	119	119	112	147	154	42	15	219.9	155.3	13	233.5	176.5	13	240.3	197.3	17	231.233	176.367	14.3333
PI230189	M. floridulus 'US56-0022-03'	PI230189	3	1	12.5	2015-06-15	308	124	M. floridulus	PI230189	New Caledonia					-20.91	165.33	10	2015-09-08	2015-09-08	2015-10-05	2015-10-05	2015-11-09	2015-11-16	85	85	112	112	147	154	32	13	270.3	244.1	18	252.1	206.7	12	264.8	229.2	17	262.4	226.667	15.6667
PI230189	M. floridulus 'US56-0022-03'	PI230189	1	1	15	2012-08-27	82	70	M. floridulus	PI230189	New Caledonia					-20.91	165.33	10													25	0	244.4	125.8	23	243.3	127.4	25	257.9	136.4	30	248.533	129.867	26
PI230189	M. floridulus 'US56-0022-03'	PI230189	1	1	15	2012-08-27	83	71	M. floridulus	PI230189	New Caledonia					-20.91	165.33	10													16	0	231.4	107	25	209.6	94.8	24	220.4	88.1	18	220.467	96.6333	22.3333
PI230189	M. floridulus 'US56-0022-03'	PI230189	1	1	15	2012-08-27	84	72	M. floridulus	PI230189	New Caledonia					-20.91	165.33	10													17	0	259	113.7	23	251.4	117.8	24	255.4	119.4	28	255.267	116.967	25
UI10-00074	M. sinensis 'Nippon'	UI10-00074	1	2	10	2012-08-27	38	121	M. sinensis	UI10-00074									2012-10-10	2012-10-12					44	46					324	0	29	8.8	12	28.8	8.9	18	27	6.4	5	28.2667	8.03333	11.6667
UI10-00074	M. sinensis 'Nippon'	UI10-00074	1	2	10	2012-08-27	39	122	M. sinensis	UI10-00074									2012-09-22	2012-09-22	2012-09-22	2012-09-22			26	26	26	26			592	1	30.3	6.4	4	35.4	6.6	4	32.4	6.7	8	32.7	6.56667	5.33333
UI10-00074	M. sinensis 'Nippon'	UI10-00074	1	2	10	2012-08-27	40	123	M. sinensis	UI10-00074									2012-10-12						46						412	0	29.7	4.7	6	34.4	6.9	8	29.8	5.8	9	31.3	5.8	7.66667
UI10-00074	M. sinensis 'Nippon'	UI10-00074	3	1	12.5	2015-06-15	326	144	M. sinensis	UI10-00074									2015-07-27	2015-07-27	2015-08-10	2015-08-10	2015-08-10	2015-08-17	42	42	56	56	56	63	130	4	58.9	34.5	4	48.5	30.6	5	39.2	27.6	5	48.8667	30.9	4.66667
UI10-00074	M. sinensis 'Nippon'	UI10-00074	1	1	15	2012-08-27	101	124	M. sinensis	UI10-00074									2012-10-10	2012-10-24	2012-11-05	2012-11-12	2012-11-09	2012-11-19	44	58	70	77	74	84	116	50	126.7	74.4	6	127.2	73.5	10	137.3	102	9	130.4	83.3	8.33333
UI10-00074	M. sinensis 'Nippon'	UI10-00074	1	1	15	2012-08-27	102	125	M. sinensis	UI10-00074									2012-10-10	2012-10-24	2012-11-09	2012-11-12	2012-11-14	2012-11-19	44	58	74	77	79	84	106	58	129.9	93.9	10	135.4	94.4	15	131.4	94.8	10	132.233	94.3667	11.6667
UI10-00074	M. sinensis 'Nippon'	UI10-00074	1	1	15	2012-08-27	103	126	M. sinensis	UI10-00074									2012-10-05	2012-10-22	2012-10-29	2012-11-02	2012-11-09	2012-11-14	39	56	63	67	74	79	79	55	103.8	66	8	107.9	69.4	8	109.3	69.1	6	107	68.1667	7.33333
PMS-130	M. sinensis 'PMS-130'	PMS-130	3	2	10	2015-06-15	243	4	M. sinensis		China	Gansu	Longnan			33.4555	105.137	1807	2015-07-13	2015-07-20	2015-07-20	2015-07-27			28	35	35	42			65	1	50.6	33	10	83.6	19.1	11	98.3	24.5	12	77.5	25.5333	11
PMS-130	M. sinensis 'PMS-130'	PMS-130	3	2	10	2015-06-15	244	5	M. sinensis		China	Gansu	Longnan			33.4555	105.137	1807	2015-07-20						35						138	≥1	87.8	21	13	83.5	19.4	11	76.5	19.5	10	82.6	19.9667	11.3333
PMS-130	M. sinensis 'PMS-130'	PMS-130	3	2	10	2015-06-15	245	6	M. sinensis		China	Gansu	Longnan			33.4555	105.137	1807	2015-07-27						42						72	≥1	88	19.8	18	84.5	15.3	12	83.5	20.1	10	85.3333	18.4	13.3333
PMS-130	M. sinensis 'PMS-130'	PMS-130	2	2	12.5	2014-01-20	130	4	M. sinensis		China	Gansu	Longnan			33.4555	105.137	1807													30	0	100	28	11	96	26.5	6	97	23	8	97.6667	25.8333	8.33333
PMS-130	M. sinensis 'PMS-130'	PMS-130	2	2	12.5	2014-01-20	131	5	M. sinensis		China	Gansu	Longnan			33.4555	105.137	1807	2014-03-03						42						86	0	79	14	8	80	14	6	83	18	5	80.6667	15.3333	6.33333
PMS-130	M. sinensis 'PMS-130'	PMS-130	2	2	12.5	2014-01-20	132	6	M. sinensis		China	Gansu	Longnan			33.4555	105.137	1807													122	0	103	36	8	95	23	6	101	21	9	99.6667	26.6667	7.66667
PMS-130	M. sinensis 'PMS-130'	PMS-130	2	1	15	2014-01-20	186	64	M. sinensis		China	Gansu	Longnan			33.4555	105.137	1807	2014-03-24	2014-05-12	2014-05-19	2014-05-27	2014-06-09	2014-07-04	63	112	119	127	140	165	8	2	163	78	7	145	51	5	130	67	5	146	65.3333	5.66667
PMS-130	M. sinensis 'PMS-130'	PMS-130	2	1	15	2014-01-20	187	65	M. sinensis		China	Gansu	Longnan			33.4555	105.137	1807	2014-03-24	2014-05-12	2014-05-16	2014-05-19	2014-06-09	2014-07-18	63	112	116	119	140	179	6	1	137	52	5	102	59	6	97	73	5	112	61.3333	5.33333
PMS-130	M. sinensis 'PMS-130'	PMS-130	2	1	15	2014-01-20	188	66	M. sinensis		China	Gansu	Longnan			33.4555	105.137	1807	2014-03-14	2014-05-02	2014-05-06	2014-05-12	2014-06-09	2014-06-16	53	102	106	112	140	147	7	5	156	73	6	157	68	5	166	83	5	159.667	74.6667	5.33333
PMS-159	M. sinensis 'PMS-159'	PMS-159	3	2	10	2015-06-15	246	7	M. sinensis		China	Henan	Sanmenxia			34.1295	111.044	757	2015-07-27						42						137	≥1	61.1	13.6	9	66.4	15.2	9	55.8	13.2	8	61.1	14	8.66667
PMS-159	M. sinensis 'PMS-159'	PMS-159	3	2	10	2015-06-15	247	8	M. sinensis		China	Henan	Sanmenxia			34.1295	111.044	757	2015-10-05						112						132	≥1	70.8	15.6	10	63.2	14	13	72	15.4	11	68.6667	15	11.3333
PMS-159	M. sinensis 'PMS-159'	PMS-159	3	2	10	2015-06-15	248	9	M. sinensis		China	Henan	Sanmenxia			34.1295	111.044	757													146	0	53.3	10.7	10	57.9	11.5	7	54.4	10.6	6	55.2	10.9333	7.66667
PMS-159	M. sinensis 'PMS-159'	PMS-159	2	2	12.5	2014-01-20	133	7	M. sinensis		China	Henan	Sanmenxia			34.1295	111.044	757													76	0	93	29	7	95	30.5	7	102	38	8	96.6667	32.5	7.33333
PMS-159	M. sinensis 'PMS-159'	PMS-159	2	2	12.5	2014-01-20	134	8	M. sinensis		China	Henan	Sanmenxia			34.1295	111.044	757													40	0	90	28	6	69	20	4	49	10	7	69.3333	19.3333	5.66667
PMS-159	M. sinensis 'PMS-159'	PMS-159	2	2	12.5	2014-01-20	135	9	M. sinensis		China	Henan	Sanmenxia			34.1295	111.044	757	2014-03-03						42						56	0	98	33	6	83	24.5	5	87	34	7	89.3333	30.5	6
PMS-159	M. sinensis 'PMS-159'	PMS-159	2	1	15	2014-01-20	189	67	M. sinensis		China	Henan	Sanmenxia			34.1295	111.044	757	2014-03-17	2014-04-11	2014-04-21	2014-04-25	2014-05-09	2014-05-12	56	81	91	95	109	112	38	21	223	91	6	223	92	6	227	96	6	224.333	93	6
PMS-159	M. sinensis 'PMS-159'	PMS-159	2	1	15	2014-01-20	190	68	M. sinensis		China	Henan	Sanmenxia			34.1295	111.044	757	2014-03-24	2014-04-14	2014-04-25	2014-05-02	2014-05-12	2014-05-12	63	84	95	102	112	112	20	9	241	113	8	247	103	8	255	164	9	247.667	126.667	8.33333
PMS-159	M. sinensis 'PMS-159'	PMS-159	2	1	15	2014-01-20	191	69	M. sinensis		China	Henan	Sanmenxia			34.1295	111.044	757	2014-03-17	2014-04-11	2014-04-18	2014-04-21	2014-05-09	2014-05-12	56	81	88	91	109	112	39	13	241	114	7	231	99	7	236	108	7	236	107	7
PMS-161	M. sinensis 'PMS-161'	PMS-161	3	2	10	2015-06-15	249	10	M. sinensis		China	Shanxi	Qinshui			35.722	112.325	724	2015-09-21						98						33	2	45.6	15	8	44.3	10.5	7	36.2	4.2	8	42.0333	9.9	7.66667
PMS-161	M. sinensis 'PMS-161'	PMS-161	3	2	10	2015-06-15	250	11	M. sinensis		China	Shanxi	Qinshui			35.722	112.325	724													46	0	31.6	3.8	9	33.5	4.4	10	27.2	5	10	30.7667	4.4	9.66667
PMS-161	M. sinensis 'PMS-161'	PMS-161	3	2	10	2015-06-15	251	12	M. sinensis		China	Shanxi	Qinshui			35.722	112.325	724													30	0	38	5.5	12	28.8	5.6	6	30.2	6.4	12	32.3333	5.83333	10
PMS-161	M. sinensis 'PMS-161'	PMS-161	2	2	12.5	2014-01-20	136	10	M. sinensis		China	Shanxi	Qinshui			35.722	112.325	724													13	0	30.5	0	14	24.5	1	8	29.5	0	8	28.1667	0.333333	10
PMS-161	M. sinensis 'PMS-161'	PMS-161	2	2	12.5	2014-01-20	137	11	M. sinensis		China	Shanxi	Qinshui			35.722	112.325	724													19	0	32	6	3	28	3	8	25.5	0	11	28.5	3	7.33333
PMS-161	M. sinensis 'PMS-161'	PMS-161	2	2	12.5	2014-01-20	138	12	M. sinensis		China	Shanxi	Qinshui			35.722	112.325	724													30	0	52	14	3	51	15	3	33	2	15	45.3333	10.3333	7
PMS-161	M. sinensis 'PMS-161'	PMS-161	2	1	15	2014-01-20	192	70	M. sinensis		China	Shanxi	Qinshui			35.722	112.325	724	2014-04-04	2014-05-19	2014-05-19	2014-05-27	2014-06-13	2014-06-27	74	119	119	127	144	158	9	4	148	109	7	163	111	6	184	121	6	165	113.667	6.33333
PMS-161	M. sinensis 'PMS-161'	PMS-161	2	1	15	2014-01-20	193	71	M. sinensis		China	Shanxi	Qinshui			35.722	112.325	724	2014-04-04	2014-05-23	2014-05-27	2014-06-13	2014-06-13	2014-06-13	74	123	127	144	144	144	16	11	157	112	5	156	125	7	157	116	6	156.667	117.667	6
PMS-161	M. sinensis 'PMS-161'	PMS-161	2	1	15	2014-01-20	194	72	M. sinensis		China	Shanxi	Qinshui			35.722	112.325	724	2014-04-04	2014-05-19	2014-05-23	2014-05-27	2014-06-13	2014-06-13	74	119	123	127	144	144	13	7	161	103	6	160	106	6	180	127	6	167	112	6
PMS-164	M. sinensis 'PMS-164'	PMS-164	3	2	10	2015-06-15	252	13	M. sinensis		China	Hebei	Xingtai			37.34	114.281	360													39	0	39	7.3	11	38.6	8.5	7	34	7.3	11	37.2	7.7	9.66667
PMS-164	M. sinensis 'PMS-164'	PMS-164	3	2	10	2015-06-15	253	14	M. sinensis		China	Hebei	Xingtai			37.34	114.281	360													95	0	38	6.6	8	34.5	6.2	5	34.5	6.5	8	35.6667	6.43333	7
PMS-164	M. sinensis 'PMS-164'	PMS-164	3	2	10	2015-06-15	254	15	M. sinensis		China	Hebei	Xingtai			37.34	114.281	360													137	0	39.6	7.5	7	42.2	10.2	7	43.6	9.1	10	41.8	8.93333	8
PMS-164	M. sinensis 'PMS-164'	PMS-164	2	2	12.5	2014-01-20	139	13	M. sinensis		China	Hebei	Xingtai			37.34	114.281	360													52	0	49	10.5	5	40	10.5	4	25	2	3	38	7.66667	4
PMS-164	M. sinensis 'PMS-164'	PMS-164	2	2	12.5	2014-01-20	140	14	M. sinensis		China	Hebei	Xingtai			37.34	114.281	360													73	0	64	16	6	49	12	4	32	6	7	48.3333	11.3333	5.66667
PMS-164	M. sinensis 'PMS-164'	PMS-164	2	2	12.5	2014-01-20	141	15	M. sinensis		China	Hebei	Xingtai			37.34	114.281	360													40	0	27	3	7	40	5	6	28	5	7	31.6667	4.33333	6.66667
PMS-164	M. sinensis 'PMS-164'	PMS-164	2	1	15	2014-01-20	195	73	M. sinensis		China	Hebei	Xingtai			37.34	114.281	360	2014-04-25	2014-05-23	2014-05-23	2014-05-30	2014-06-13	2014-06-13	95	123	123	130	144	144	39	25	232	183	9	245	191	9	249	1936	10	242	770	9.33333
PMS-164	M. sinensis 'PMS-164'	PMS-164	2	1	15	2014-01-20	196	74	M. sinensis		China	Hebei	Xingtai			37.34	114.281	360	2014-04-25	2014-05-23	2014-06-27	2014-05-30	2014-05-30	2014-06-13	95	123	158	130	130	144	63	29	214	170	9	219	184	10	205	175	10	212.667	176.333	9.66667
PMS-164	M. sinensis 'PMS-164'	PMS-164	2	1	15	2014-01-20	197	75	M. sinensis		China	Hebei	Xingtai			37.34	114.281	360	2014-04-25	2014-05-23	2014-05-27	2014-05-30	2014-06-13	2014-06-13	95	123	127	130	144	144	46	27	222	169	9	235	149	10	215	172	8	224	163.333	9
PMS-204	M. sinensis 'PMS-204'	PMS-204	3	2	10	2015-06-15	255	16	M. sinensis		China	Henan	Xinyang			31.7013	114.874	103													78	0	86.3	21.7	9	88.6	22.3	8	81.1	19.2	6	85.3333	21.0667	7.66667
PMS-204	M. sinensis 'PMS-204'	PMS-204	3	2	10	2015-06-15	256	17	M. sinensis		China	Henan	Xinyang			31.7013	114.874	103													165	0	80.6	18.8	8	69.5	18.3	10	77.5	18.2	7	75.8667	18.4333	8.33333
PMS-204	M. sinensis 'PMS-204'	PMS-204	3	2	10	2015-06-15	257	18	M. sinensis		China	Henan	Xinyang			31.7013	114.874	103													232	0	85.4	21	11	82.3	22.4	10	80.2	21.8	9	82.6333	21.7333	10
PMS-204	M. sinensis 'PMS-204'	PMS-204	2	2	12.5	2014-01-20	142	16	M. sinensis		China	Henan	Xinyang			31.7013	114.874	103													74	0	122	44	9	119	38	6	110	34	8	117	38.6667	7.66667
PMS-204	M. sinensis 'PMS-204'	PMS-204	2	2	12.5	2014-01-20	143	17	M. sinensis		China	Henan	Xinyang			31.7013	114.874	103													86	0	121	29	6	116	31.5	7	125	36	9	120.667	32.1667	7.33333
PMS-204	M. sinensis 'PMS-204'	PMS-204	2	2	12.5	2014-01-20	144	18	M. sinensis		China	Henan	Xinyang			31.7013	114.874	103													72	0	100	29	7	103	36	6	90	16	5	97.6667	27	6
PMS-204	M. sinensis 'PMS-204'	PMS-204	2	1	15	2014-01-20	198	76	M. sinensis		China	Henan	Xinyang			31.7013	114.874	103	2014-05-12	2014-05-30	2014-07-04	2014-07-11	2014-07-21	2014-07-28	112	130	165	172	182	189	57	21	259	184	12	255	162	12	274	204	12	262.667	183.333	12
PMS-204	M. sinensis 'PMS-204'	PMS-204	2	1	15	2014-01-20	199	77	M. sinensis		China	Henan	Xinyang			31.7013	114.874	103	2014-05-12	2014-05-30	2014-07-01	2014-07-18	2014-07-21	2014-07-28	112	130	162	179	182	189	52	18	264	162	10	237	145	11	251	145	12	250.667	150.667	11
PMS-204	M. sinensis 'PMS-204'	PMS-204	2	1	15	2014-01-20	200	78	M. sinensis		China	Henan	Xinyang			31.7013	114.874	103	2014-05-12	2014-05-30	2014-06-27	2014-06-27	2014-07-21	2014-07-28	112	130	158	158	182	189	52	19	269	198	13	269	184	12	279	198	12	272.333	193.333	12.3333
PMS-226	M. sinensis 'PMS-226'	PMS-226	3	2	10	2015-06-15	258	19	M. sinensis		China	Guizhou	Guiyang			26.6206	106.751	1133	2015-07-27	2015-08-03	2015-08-10	2015-08-10	2015-08-10	2015-08-17	42	49	56	56	56	63	107	6	168.1	100.3	7	131.6	75.9	7	122.5	72.1	7	140.733	82.7667	7
PMS-226	M. sinensis 'PMS-226'	PMS-226	3	2	10	2015-06-15	259	20	M. sinensis		China	Guizhou	Guiyang			26.6206	106.751	1133	2015-07-27	2015-08-03	2015-08-03	2015-08-10	2015-08-17	2015-08-24	42	49	49	56	63	70	139	10	156.1	92.8	7	147.7	81.5	7	146.2	92	7	150	88.7667	7
PMS-226	M. sinensis 'PMS-226'	PMS-226	3	2	10	2015-06-15	260	21	M. sinensis		China	Guizhou	Guiyang			26.6206	106.751	1133	2015-07-27	2015-08-03	2015-08-10	2015-08-10	2015-08-17	2015-08-24	42	49	56	56	63	70	125	9	157	92.5	8	130.5	77.4	7	121.3	68.8	7	136.267	79.5667	7.33333
PMS-226	M. sinensis 'PMS-226'	PMS-226	2	2	12.5	2014-01-20	145	19	M. sinensis		China	Guizhou	Guiyang			26.6206	106.751	1133	2014-03-17	2014-03-28	2014-04-04	2014-04-11	2014-04-14	2014-04-14	56	67	74	81	84	84	111	38	282	209	18	281	208.5	19	282	218	18	281.667	211.833	18.3333
PMS-226	M. sinensis 'PMS-226'	PMS-226	2	2	12.5	2014-01-20	146	20	M. sinensis		China	Guizhou	Guiyang			26.6206	106.751	1133	2014-02-24	2014-03-03	2014-03-03	2014-04-04	2014-04-14	2014-04-21	35	42	42	74	84	91	92	36	282.5	218	18	289	204.5	20	288	214	19	286.5	212.167	19
PMS-226	M. sinensis 'PMS-226'	PMS-226	2	2	12.5	2014-01-20	147	21	M. sinensis		China	Guizhou	Guiyang			26.6206	106.751	1133	2014-03-10	2014-03-14	2014-03-28	2014-04-04	2014-04-07	2014-04-11	49	53	67	74	77	81	88	41	298	249.5	19	286	245.5	14	300.5	256	15	294.833	250.333	16
PMS-226	M. sinensis 'PMS-226'	PMS-226	2	1	15	2014-01-20	201	79	M. sinensis		China	Guizhou	Guiyang			26.6206	106.751	1133	2014-04-18	2014-06-20	2014-06-20	2014-07-28	2014-08-25	2014-08-25	88	151	151	189	217	217	69	31	273	166	18	301	167	11	271	164	14	281.667	165.667	14.3333
PMS-226	M. sinensis 'PMS-226'	PMS-226	2	1	15	2014-01-20	202	80	M. sinensis		China	Guizhou	Guiyang			26.6206	106.751	1133	2014-04-18	2014-06-20	2014-06-20	2014-08-08	2014-09-05	2014-09-12	88	151	151	200	228	235	62	23	275	179	8	274	170	10	279	181	13	276	176.667	10.3333
PMS-226	M. sinensis 'PMS-226'	PMS-226	2	1	15	2014-01-20	203	81	M. sinensis		China	Guizhou	Guiyang			26.6206	106.751	1133	2014-04-18	2014-06-20	2014-06-20	2014-07-18	2014-08-08	2014-08-22	88	151	151	179	200	214	55	26	272	189	17	260	176	15	278	172	22	270	179	18
PMS-300	M. sinensis x M. sacchariflorus 2x 'PMS-300'	PMS-300	3	2	10	2015-06-15	261	22	M. sinensis x M. sacchariflorus 2x		China	Zhejiang	Huzhou			30.8744	120.145	10													199	0	58	15.9	8	36.2	15.2	8	55.3	15.2	9	49.8333	15.4333	8.33333
PMS-300	M. sinensis x M. sacchariflorus 2x 'PMS-300'	PMS-300	3	2	10	2015-06-15	262	23	M. sinensis x M. sacchariflorus 2x		China	Zhejiang	Huzhou			30.8744	120.145	10													171	0	67.1	32	10	69	32.7	17	69.5	29.1	13	68.5333	31.2667	13.3333
PMS-300	M. sinensis x M. sacchariflorus 2x 'PMS-300'	PMS-300	3	2	10	2015-06-15	263	24	M. sinensis x M. sacchariflorus 2x		China	Zhejiang	Huzhou			30.8744	120.145	10													166	0	62.5	21.3	9	60.8	22.1	12	66	24.5	9	63.1	22.6333	10
PMS-300	M. sinensis x M. sacchariflorus 2x 'PMS-300'	PMS-300	2	2	12.5	2014-01-20	148	22	M. sinensis x M. sacchariflorus 2x		China	Zhejiang	Huzhou			30.8744	120.145	10													181	0	97	58	10	93	56	12	111	49	7	100.333	54.3333	9.66667
PMS-300	M. sinensis x M. sacchariflorus 2x 'PMS-300'	PMS-300	2	2	12.5	2014-01-20	149	23	M. sinensis x M. sacchariflorus 2x		China	Zhejiang	Huzhou			30.8744	120.145	10													163	0	96	62.5	13	93	64	18	100	56	11	96.3333	60.8333	14
PMS-300	M. sinensis x M. sacchariflorus 2x 'PMS-300'	PMS-300	2	2	12.5	2014-01-20	150	24	M. sinensis x M. sacchariflorus 2x		China	Zhejiang	Huzhou			30.8744	120.145	10													39	0	74	32	7	80	23	8	71	26	13	75	27	9.33333
PMS-300	M. sinensis x M. sacchariflorus 2x 'PMS-300'	PMS-300	2	1	15	2014-01-20	204	82	M. sinensis x M. sacchariflorus 2x		China	Zhejiang	Huzhou			30.8744	120.145	10	2014-07-04	2014-07-11	2014-07-18	2014-08-08	2014-08-22	2014-09-05	165	172	179	200	214	228	128	23	231	142	15	225	143	15	224	139	14	226.667	141.333	14.6667
PMS-300	M. sinensis x M. sacchariflorus 2x 'PMS-300'	PMS-300	2	1	15	2014-01-20	205	83	M. sinensis x M. sacchariflorus 2x		China	Zhejiang	Huzhou			30.8744	120.145	10	2014-07-11	2014-07-18	2014-07-28	2014-08-29	2014-08-29	2014-09-05	172	179	189	221	221	228	54	13	195	156	14	176	144	11	188	155	12	186.333	151.667	12.3333
PMS-300	M. sinensis x M. sacchariflorus 2x 'PMS-300'	PMS-300	2	1	15	2014-01-20	206	84	M. sinensis x M. sacchariflorus 2x		China	Zhejiang	Huzhou			30.8744	120.145	10	2014-07-11	2014-08-11	2014-08-11	2014-08-22	2014-08-29	2014-09-05	172	203	203	214	221	228	72	10	197	139	14	182	141	11	207	159	18	195.333	146.333	14.3333
PMS-306	M. sinensis 'PMS-306'	PMS-306	3	2	10	2015-06-15	264	25	M. sinensis		China	Zhejiang	Fuyang			29.8918	119.842	20													129	0	98.7	23	11	84	21.4	8	69.5	18.2	12	84.0667	20.8667	10.3333
PMS-306	M. sinensis 'PMS-306'	PMS-306	3	2	10	2015-06-15	265	26	M. sinensis		China	Zhejiang	Fuyang			29.8918	119.842	20													137	0	65.1	15.6	8	77	15.1	10	62.4	15.6	7	68.1667	15.4333	8.33333
PMS-306	M. sinensis 'PMS-306'	PMS-306	3	2	10	2015-06-15	266	27	M. sinensis		China	Zhejiang	Fuyang			29.8918	119.842	20													94	0	70	17	10	73.8	17	8	56	13	8	66.6	15.6667	8.66667
PMS-306	M. sinensis 'PMS-306'	PMS-306	2	2	12.5	2014-01-20	151	25	M. sinensis		China	Zhejiang	Fuyang			29.8918	119.842	20	2014-03-21	2014-03-24	2014-04-04	2014-04-07	2014-07-04	2014-07-18	60	63	74	77	165	179	101	6	239	142.5	9	161	84	15	151	110	10	183.667	112.167	11.3333
PMS-306	M. sinensis 'PMS-306'	PMS-306	2	2	12.5	2014-01-20	152	26	M. sinensis		China	Zhejiang	Fuyang			29.8918	119.842	20	2014-04-04	2014-04-11	2014-04-18	2014-04-21	2014-07-04	2014-07-18	74	81	88	91	165	179	71	5	177	129	11	161	130	11	147	118	11	161.667	125.667	11
PMS-306	M. sinensis 'PMS-306'	PMS-306	2	2	12.5	2014-01-20	153	27	M. sinensis		China	Zhejiang	Fuyang			29.8918	119.842	20	2014-03-24	2014-04-07	2014-04-14	2014-04-14			63	77	84	84			88	4	149	37.5	7	128	34	9	125	45.5	9	134	39	8.33333
PMS-306	M. sinensis 'PMS-306'	PMS-306	2	1	15	2014-01-20	207	85	M. sinensis		China	Zhejiang	Fuyang			29.8918	119.842	20	2014-05-27	2014-06-27	2014-07-11	2014-07-18	2014-07-28	2014-08-08	127	158	172	179	189	200	51	25	250	153	10	252	185	10	268	170	10	256.667	169.333	10
PMS-306	M. sinensis 'PMS-306'	PMS-306	2	1	15	2014-01-20	208	86	M. sinensis		China	Zhejiang	Fuyang			29.8918	119.842	20	2014-05-27	2014-07-11	2014-07-14	2014-07-18	2014-07-28	2014-08-08	127	172	175	179	189	200	58	19	227	131	10	221	124	8	223	156	9	223.667	137	9
PMS-306	M. sinensis 'PMS-306'	PMS-306	2	1	15	2014-01-20	209	87	M. sinensis		China	Zhejiang	Fuyang			29.8918	119.842	20	2014-05-27	2014-06-27	2014-06-27	2014-07-01	2014-07-28	2014-08-08	127	158	158	162	189	200	78	30	250	144	12	239	174	12	242	180	12	243.667	166	12
PMS-314	M. sinensis 'PMS-314'	PMS-314	3	2	10	2015-06-15	267	28	M. sinensis		China	Fujian	Ningde			26.5279	119.632	279	2015-08-10						56						95	2	100.1	39.2	12	62.2	52	12	55.5	43	11	72.6	44.7333	11.6667
PMS-314	M. sinensis 'PMS-314'	PMS-314	3	2	10	2015-06-15	268	29	M. sinensis		China	Fujian	Ningde			26.5279	119.632	279	2015-08-03						49						129	1	56.1	47	8	75.5	19.5	11	64.4	17.6	11	65.3333	28.0333	10
PMS-314	M. sinensis 'PMS-314'	PMS-314	3	2	10	2015-06-15	269	30	M. sinensis		China	Fujian	Ningde			26.5279	119.632	279	2015-08-20						66						83	1	69.2	38.8	12	97.5	38	12	85	34.8	14	83.9	37.2	12.6667
PMS-314	M. sinensis 'PMS-314'	PMS-314	2	2	12.5	2014-01-20	154	28	M. sinensis		China	Fujian	Ningde			26.5279	119.632	279													54	0	118	26	5	106	16.5	3	105	60	18	109.667	34.1667	8.66667
PMS-314	M. sinensis 'PMS-314'	PMS-314	2	2	12.5	2014-01-20	155	29	M. sinensis		China	Fujian	Ningde			26.5279	119.632	279													61	0	101	15	4	92	18	6	101	19	3	98	17.3333	4.33333
PMS-314	M. sinensis 'PMS-314'	PMS-314	2	2	12.5	2014-01-20	156	30	M. sinensis		China	Fujian	Ningde			26.5279	119.632	279													70	0	100	15	5	108	19	5	109	33	8	105.667	22.3333	6
PMS-314	M. sinensis 'PMS-314'	PMS-314	2	1	15	2014-01-20	210	88	M. sinensis		China	Fujian	Ningde			26.5279	119.632	279	2014-05-23	2014-06-13	2014-06-27	2014-07-04	2014-07-18	2014-07-18	123	144	158	165	179	179	47	24	285	198	12	293	193	12	286	172	12	288	187.667	12
PMS-314	M. sinensis 'PMS-314'	PMS-314	2	1	15	2014-01-20	211	89	M. sinensis		China	Fujian	Ningde			26.5279	119.632	279	2014-05-27	2014-06-13	2014-06-27	2014-07-01	2014-07-01	2014-07-18	127	144	158	162	162	179	44	20	290	164	12	272	163	11	276	179	12	279.333	168.667	11.6667
PMS-314	M. sinensis 'PMS-314'	PMS-314	2	1	15	2014-01-20	212	90	M. sinensis		China	Fujian	Ningde			26.5279	119.632	279	2014-05-27	2014-06-13	2014-07-01	2014-07-11	2014-07-18	2014-07-18	127	144	162	172	179	179	19	15	218	153	11	175	118	8	216	141	9	203	137.333	9.33333
PMS-347	M. sinensis 'PMS-347'	PMS-347	3	2	10	2015-06-15	270	31	M. sinensis		China	Guangdong	Xingning			24.168	115.884	286	2015-08-10	2015-08-10	2015-08-24	2015-08-31	2015-09-14	2015-09-14	56	56	70	77	91	91	120	8	136.6	84.1	9	136	87.4	8	148.5	104.4	10	140.367	91.9667	9
PMS-347	M. sinensis 'PMS-347'	PMS-347	3	2	10	2015-06-15	271	32	M. sinensis		China	Guangdong	Xingning			24.168	115.884	286	2015-08-17	2015-08-24	2015-09-08	2015-09-08	2015-09-21	2015-09-21	63	70	85	85	98	98	107	4	135.5	80.3	9	138.2	88	9	149.5	100.7	9	141.067	89.6667	9
PMS-347	M. sinensis 'PMS-347'	PMS-347	3	2	10	2015-06-15	272	33	M. sinensis		China	Guangdong	Xingning			24.168	115.884	286													147	0	92.1	35	10	87.7	29.2	7	85.2	32.8	8	88.3333	32.3333	8.33333
PMS-347	M. sinensis 'PMS-347'	PMS-347	2	2	12.5	2014-01-20	157	31	M. sinensis		China	Guangdong	Xingning			24.168	115.884	286	2014-03-21	2014-03-24	2014-04-18	2014-04-21	2014-04-29	2014-04-29	60	63	88	91	99	99	141	32	237	177	15	214	159	17	213	155	14	221.333	163.667	15.3333
PMS-347	M. sinensis 'PMS-347'	PMS-347	2	2	12.5	2014-01-20	158	32	M. sinensis		China	Guangdong	Xingning			24.168	115.884	286	2014-03-24	2014-03-31	2014-04-18	2014-04-21	2014-04-29	2014-05-06	63	70	88	91	99	106	147	53	260	184	14	260	188	16	263	179	15	261	183.667	15
PMS-347	M. sinensis 'PMS-347'	PMS-347	2	2	12.5	2014-01-20	159	33	M. sinensis		China	Guangdong	Xingning			24.168	115.884	286	2014-03-24	2014-03-24	2014-04-18	2014-04-21	2014-04-29	2014-05-06	63	63	88	91	99	106	52	4	134	111	13	160	96	12	158	114	11	150.667	107	12
PMS-347	M. sinensis 'PMS-347'	PMS-347	2	1	15	2014-01-20	213	91	M. sinensis		China	Guangdong	Xingning			24.168	115.884	286	2014-09-05	2014-09-19	2014-09-19	2014-09-26			228	242	242	249			71	17	282	186	12	252	175	16	262	168	19	265.333	176.333	15.6667
PMS-347	M. sinensis 'PMS-347'	PMS-347	2	1	15	2014-01-20	214	92	M. sinensis		China	Guangdong	Xingning			24.168	115.884	286	2014-08-29	2014-09-12	2014-09-12	2014-09-19			221	235	235	242			82	25	267	185	14	330	231	12	275	186	14	290.667	200.667	13.3333
PMS-347	M. sinensis 'PMS-347'	PMS-347	2	1	15	2014-01-20	215	93	M. sinensis		China	Guangdong	Xingning			24.168	115.884	286	2014-09-05	2014-09-19	2014-09-19	2014-09-26			228	242	242	249			60	22	273	213	17	275	188	16	281	215	12	276.333	205.333	15
PMS-359	M. sinensis 'PMS-359'	PMS-359	3	2	10	2015-06-15	273	34	M. sinensis		China	Guangdong	Yunfu			22.9134	112.337	20	2015-08-17												101	≥1	168.5	95.6	10	157.4	91.3	11	138.5	69.5	9	154.8	85.4667	10
PMS-359	M. sinensis 'PMS-359'	PMS-359	3	2	10	2015-06-15	274	35	M. sinensis		China	Guangdong	Yunfu			22.9134	112.337	20	2015-07-27	2015-08-03	2015-08-10	2015-08-17	2015-08-31		42	49	56	63	77		102	1	165.1	83	7	165.8	90.2	8	163.5	90.7	8	164.8	87.9667	7.66667
PMS-359	M. sinensis 'PMS-359'	PMS-359	3	2	10	2015-06-15	275	36	M. sinensis		China	Guangdong	Yunfu			22.9134	112.337	20	2015-07-27	2015-08-10	2015-08-10	2015-08-17	2015-08-17	2015-09-14	42	56	56	63	63	91	125	4	153.2	84.9	10	133.2	77	12	133	85.1	8	139.8	82.3333	10
PMS-359	M. sinensis 'PMS-359'	PMS-359	2	2	12.5	2014-01-20	160	34	M. sinensis		China	Guangdong	Yunfu			22.9134	112.337	20	2014-03-21	2014-03-24	2014-04-11	2014-04-14	2014-04-29	2014-04-29	60	63	81	84	99	99	102	40	303	210	10	330	269.5	13	337	260	15	323.333	246.5	12.6667
PMS-359	M. sinensis 'PMS-359'	PMS-359	2	2	12.5	2014-01-20	161	35	M. sinensis		China	Guangdong	Yunfu			22.9134	112.337	20	2014-03-14	2014-03-21	2014-04-04	2014-04-11	2014-04-18	2014-04-21	53	60	74	81	88	91	107	34	326	239	12	299	200	13	310	220	11	311.667	219.667	12
PMS-359	M. sinensis 'PMS-359'	PMS-359	2	2	12.5	2014-01-20	162	36	M. sinensis		China	Guangdong	Yunfu			22.9134	112.337	20	2014-03-14	2014-03-21	2014-04-04	2014-04-07	2014-04-14	2014-04-21	53	60	74	77	84	91	77	32	333	217	13	359	233	9	346	231	10	346	227	10.6667
PMS-359	M. sinensis 'PMS-359'	PMS-359	2	1	15	2014-01-20	216	94	M. sinensis		China	Guangdong	Yunfu			22.9134	112.337	20	2014-08-08						200						50	7	335	262	22	313	215	15	310	222	17	319.333	233	18
PMS-359	M. sinensis 'PMS-359'	PMS-359	2	1	15	2014-01-20	217	95	M. sinensis		China	Guangdong	Yunfu			22.9134	112.337	20	2014-08-08						200						51	13	314	262	19	324	251	20	315	255	19	317.667	256	19.3333
PMS-359	M. sinensis 'PMS-359'	PMS-359	2	1	15	2014-01-20	218	96	M. sinensis		China	Guangdong	Yunfu			22.9134	112.337	20	2014-06-09	2014-07-04	2014-07-11	2014-07-18			140	165	172	179			45	1	300	179	11	296	195	15	295	241	24	297	205	16.6667
PMS-375	M. sinensis 'PMS-375'	PMS-375	3	2	10	2015-06-15	276	37	M. sinensis		China	Hainan	Ding'an			19.6304	110.291	84													157	0	113.2	60	12	114.9	61.8	11	114.2	64.3	14	114.1	62.0333	12.3333
PMS-375	M. sinensis 'PMS-375'	PMS-375	3	2	10	2015-06-15	277	38	M. sinensis		China	Hainan	Ding'an			19.6304	110.291	84	2015-08-17	2015-08-24	2015-09-14	2015-09-14			63	70	91	91			93	1	109.5	67.7	9	144.2	90.8	14	142.1	76.5	11	131.933	78.3333	11.3333
PMS-375	M. sinensis 'PMS-375'	PMS-375	3	2	10	2015-06-15	278	39	M. sinensis		China	Hainan	Ding'an			19.6304	110.291	84	2015-08-17	2015-08-24	2015-09-14	2015-09-14			63	70	91	91			92	2	108.6	66.3	8	104.5	60	9	197.2	137.6	16	136.767	87.9667	11
PMS-375	M. sinensis 'PMS-375'	PMS-375	2	2	12.5	2014-01-20	163	37	M. sinensis		China	Hainan	Ding'an			19.6304	110.291	84	2014-04-14	2014-05-16	2014-05-19	2014-05-27	2014-05-27	2014-05-30	84	116	119	127	127	130	63	39	248	174	16	237	155	20	232	176	18	239	168.333	18
PMS-375	M. sinensis 'PMS-375'	PMS-375	2	2	12.5	2014-01-20	164	38	M. sinensis		China	Hainan	Ding'an			19.6304	110.291	84	2014-04-29	2014-06-09	2014-06-13	2014-06-16	2014-06-16	2014-06-20	99	140	144	147	147	151	55	36	246	190	17	235	182	14	274	215	14	251.667	195.667	15
PMS-375	M. sinensis 'PMS-375'	PMS-375	2	2	12.5	2014-01-20	165	39	M. sinensis		China	Hainan	Ding'an			19.6304	110.291	84	2014-05-06	2014-06-09	2014-06-16	2014-06-20	2014-06-27	2014-07-01	106	140	147	151	158	162	69	39	271	219	14	263	228.5	14	241	169	13	258.333	205.5	13.6667
PMS-375	M. sinensis 'PMS-375'	PMS-375	2	1	15	2014-01-20	219	97	M. sinensis		China	Hainan	Ding'an			19.6304	110.291	84													44	0	319	204	27	334	233	27	296	212	28	316.333	216.333	27.3333
PMS-375	M. sinensis 'PMS-375'	PMS-375	2	1	15	2014-01-20	220	98	M. sinensis		China	Hainan	Ding'an			19.6304	110.291	84													41	0	335	233	31	328	224	27	323	219	27	328.667	225.333	28.3333
PMS-375	M. sinensis 'PMS-375'	PMS-375	2	1	15	2014-01-20	221	99	M. sinensis		China	Hainan	Ding'an			19.6304	110.291	84													51	0	309	215	27	292	176	13	278	159	19	293	183.333	19.6667
PMS-382	M. sinensis 'PMS-382'	PMS-382	3	2	10	2015-06-15	279	40	M. sinensis		China	Hainan	Wuzhishan			18.9056	109.514	309	2015-09-08	2015-09-08	2015-09-14	2015-09-14			85	85	91	91			53	2	175.1	109.1	10	194.3	156.7	10	197.5	145.2	14	188.967	137	11.3333
PMS-382	M. sinensis 'PMS-382'	PMS-382	3	2	10	2015-06-15	280	41	M. sinensis		China	Hainan	Wuzhishan			18.9056	109.514	309													47	0	212.2	134.7	13	175.7	117	11	191.5	145.5	20	193.133	132.4	14.6667
PMS-382	M. sinensis 'PMS-382'	PMS-382	3	2	10	2015-06-15	281	42	M. sinensis		China	Hainan	Wuzhishan			18.9056	109.514	309	2015-08-31	2015-08-31	2015-09-14	2015-09-14	2015-09-28	2015-09-28	77	77	91	91	105	105	118	5	205.5	166.3	12	199.2	148.3	14	198.2	150.4	11	200.967	155	12.3333
PMS-382	M. sinensis 'PMS-382'	PMS-382	2	2	12.5	2014-01-20	166	40	M. sinensis		China	Hainan	Wuzhishan			18.9056	109.514	309	2014-06-16	2014-07-13	2014-07-28	2014-08-08	2014-08-22	2014-08-25	147	174	189	200	214	217	63	15	230	221	18	203	203	15	247	222	16	226.667	215.333	16.3333
PMS-382	M. sinensis 'PMS-382'	PMS-382	2	2	12.5	2014-01-20	167	41	M. sinensis		China	Hainan	Wuzhishan			18.9056	109.514	309	2014-05-30	2014-06-20	2014-06-27	2014-07-01	2014-07-28	2014-08-08	130	151	158	162	189	200	40	21	228	152.5	14	235	235	13	236	229	13	233	205.5	13.3333
PMS-382	M. sinensis 'PMS-382'	PMS-382	2	2	12.5	2014-01-20	168	42	M. sinensis		China	Hainan	Wuzhishan			18.9056	109.514	309	2014-05-30	2014-07-04	2014-07-18	2014-07-28	2014-07-28	2014-08-08	130	165	179	189	189	200	49	21	258	220	14	223	223	15	234	234	15	238.333	225.667	14.6667
PMS-382	M. sinensis 'PMS-382'	PMS-382	2	1	15	2014-01-20	222	100	M. sinensis		China	Hainan	Wuzhishan			18.9056	109.514	309													46	0	279	178	18	282	184	21	275	188	21	278.667	183.333	20
PMS-382	M. sinensis 'PMS-382'	PMS-382	2	1	15	2014-01-20	223	101	M. sinensis		China	Hainan	Wuzhishan			18.9056	109.514	309													34	0	209	151	20	241	128	11	241	179	25	230.333	152.667	18.6667
PMS-382	M. sinensis 'PMS-382'	PMS-382	2	1	15	2014-01-20	224	102	M. sinensis		China	Hainan	Wuzhishan			18.9056	109.514	309													40	0	268	164	14	281	181	18	267	184	22	272	176.333	18
PMS-436	M. sinensis 'PMS-436'	PMS-436	3	2	10	2015-06-15	282	43	M. sinensis		China	Liaoning	Benxi			41.317	123.738	183													62	0	24.6	6	7	22.8	4.6	7	21.8	4.3	6	23.0667	4.96667	6.66667
PMS-436	M. sinensis 'PMS-436'	PMS-436	3	2	10	2015-06-15	283	44	M. sinensis		China	Liaoning	Benxi			41.317	123.738	183													109	0	38.5	7	7	34.5	8	8	28	5.8	7	33.6667	6.93333	7.33333
PMS-436	M. sinensis 'PMS-436'	PMS-436	3	2	10	2015-06-15	284	45	M. sinensis		China	Liaoning	Benxi			41.317	123.738	183													93	0	32.3	6.8	8	26.5	6.1	10	26.8	6.6	10	28.5333	6.5	9.33333
PMS-436	M. sinensis 'PMS-436'	PMS-436	2	2	12.5	2014-01-20	169	43	M. sinensis		China	Liaoning	Benxi			41.317	123.738	183													48	0	37.5	3.5	7	25	1.5	9	26	1.5	6	29.5	2.16667	7.33333
PMS-436	M. sinensis 'PMS-436'	PMS-436	2	2	12.5	2014-01-20	170	44	M. sinensis		China	Liaoning	Benxi			41.317	123.738	183													48	0	67	1	4	65	2	15	58	2.5	13	63.3333	1.83333	10.6667
PMS-436	M. sinensis 'PMS-436'	PMS-436	2	2	12.5	2014-01-20	171	45	M. sinensis		China	Liaoning	Benxi			41.317	123.738	183													68	0	26	3	3	46	2.5	8	24.5	3	7	32.1667	2.83333	6
PMS-436	M. sinensis 'PMS-436'	PMS-436	2	1	15	2014-01-20	225	103	M. sinensis		China	Liaoning	Benxi			41.317	123.738	183	2014-04-07	2014-05-16	2014-05-19	2014-05-19	2014-05-27	2014-06-09	77	116	119	119	127	140	24	9	136	110	5	183	130	5	139	113	6	152.667	117.667	5.33333
PMS-436	M. sinensis 'PMS-436'	PMS-436	2	1	15	2014-01-20	226	104	M. sinensis		China	Liaoning	Benxi			41.317	123.738	183	2014-03-28	2014-04-21	2014-04-25	2014-04-29	2014-05-09	2014-05-12	67	91	95	99	109	112	31	13	218	151	5	229	151	6	215	160	6	220.667	154	5.66667
PMS-436	M. sinensis 'PMS-436'	PMS-436	2	1	15	2014-01-20	227	105	M. sinensis		China	Liaoning	Benxi			41.317	123.738	183	2014-04-11	2014-05-23	2014-05-23	2014-05-27	2014-06-06	2014-06-09	81	123	123	127	137	140	10	2	130	80	5	138	105	6	126	109	6	131.333	98	5.66667
PMS-438	M. sinensis 'PMS-438'	PMS-438	3	2	10	2015-06-15	285	46	M. sinensis		China	Liaoning	Benxi			41.3288	123.69	148	2015-07-20						35						90	2	42.2	21.5	6	40	6.4	10	29	3.8	4	37.0667	10.5667	6.66667
PMS-438	M. sinensis 'PMS-438'	PMS-438	3	2	10	2015-06-15	286	47	M. sinensis		China	Liaoning	Benxi			41.3288	123.69	148	2015-07-20						35						147	1	32.2	7.3	5	30.7	58.5	8	31.2	5.8	5	31.3667	23.8667	6
PMS-438	M. sinensis 'PMS-438'	PMS-438	3	2	10	2015-06-15	287	48	M. sinensis		China	Liaoning	Benxi			41.3288	123.69	148	2015-07-20						35						188	3	31	8.1	8	34.5	7	5	34.4	12.6	4	33.3	9.23333	5.66667
PMS-438	M. sinensis 'PMS-438'	PMS-438	2	2	12.5	2014-01-20	172	46	M. sinensis		China	Liaoning	Benxi			41.3288	123.69	148	2014-03-14						53						166	0	55	9	3	45	1	5	37	3.5	8	45.6667	4.5	5.33333	Plants were shaded out, flag leaf observed most likely died and fell off plant.
PMS-438	M. sinensis 'PMS-438'	PMS-438	2	2	12.5	2014-01-20	173	47	M. sinensis		China	Liaoning	Benxi			41.3288	123.69	148	2014-03-14						53						102	0	54	24	10	42	12	3	38	7	3	44.6667	14.3333	5.33333	Plants were shaded out, flag leaf observed most likely died and fell off plant.
PMS-438	M. sinensis 'PMS-438'	PMS-438	2	2	12.5	2014-01-20	174	48	M. sinensis		China	Liaoning	Benxi			41.3288	123.69	148	2014-03-14						53						107	0	32	1.5	3	35	10	7	38	3.5	6	35	5	5.33333	Plants were shaded out, flag leaf observed most likely died and fell off plant.
PMS-438	M. sinensis 'PMS-438'	PMS-438	2	1	15	2014-01-20	228	106	M. sinensis		China	Liaoning	Benxi			41.3288	123.69	148	2014-03-03	2014-04-04	2014-04-07	2014-04-11	2014-05-02	2014-05-06	42	74	77	81	102	106	64	19	142	98	5	133	67	5	143	87	4	139.333	84	4.66667
PMS-438	M. sinensis 'PMS-438'	PMS-438	2	1	15	2014-01-20	229	107	M. sinensis		China	Liaoning	Benxi			41.3288	123.69	148	2014-03-03	2014-03-14	2014-03-24	2014-03-28	2014-05-02	2014-05-06	42	53	63	67	102	106	38	21	138	94	3	128	94	4	144	105	4	136.667	97.6667	3.66667
PMS-438	M. sinensis 'PMS-438'	PMS-438	2	1	15	2014-01-20	230	108	M. sinensis		China	Liaoning	Benxi			41.3288	123.69	148	2014-03-03	2014-03-07	2014-03-24	2014-03-28	2014-05-02	2014-05-06	42	46	63	67	102	106	63	39	156	98	4	139	102	4	142	98	4	145.667	99.3333	4
UI10-00012	M. sinensis var. condensatus 'Cabaret'	UI10-00012	1	2	10	2012-08-27	29	97	M. sinensis	UI10-00012	Japan																				81	0	82	19.1	7	73.5	18.5	9	76.7	16.8	7	77.4	18.1333	7.66667
UI10-00012	M. sinensis var. condensatus 'Cabaret'	UI10-00012	1	2	10	2012-08-27	30	98	M. sinensis	UI10-00012	Japan																				106	0	59.3	15.4	8	61.8	13.2	8	72.8	18.4	7	64.6333	15.6667	7.66667
UI10-00012	M. sinensis var. condensatus 'Cabaret'	UI10-00012	1	2	10	2012-08-27	31	99	M. sinensis	UI10-00012	Japan																				103	0	77.3	15.8	8	83.7	18.9	10	66	14.9	10	75.6667	16.5333	9.33333
UI10-00012	M. sinensis var. condensatus 'Cabaret'	UI10-00012	3	1	12.5	2015-06-15	317	134	M. sinensis	UI10-00012	Japan								2015-10-12	2015-10-12					119	119					24	1	114.1	92.1	11	135.9	88.2	31	118.1	42.3	16	122.7	74.2	19.3333
UI10-00012	M. sinensis var. condensatus 'Cabaret'	UI10-00012	3	1	12.5	2015-06-15	318	135	M. sinensis	UI10-00012	Japan								2015-09-21	2015-09-28	2015-10-05	2015-10-05			98	105	112	112			40	2	192.8	149.5	11	180.5	150.7	20	136.8	61.1	17	170.033	120.433	16
UI10-00012	M. sinensis var. condensatus 'Cabaret'	UI10-00012	3	1	12.5	2015-06-15	319	136	M. sinensis	UI10-00012	Japan								2015-09-14	2015-09-28	2015-09-28	2015-09-28			91	105	105	105			59	2	246.2	202.5	26	135.3	128	12	141.5	69.4	17	174.333	133.3	18.3333
UI10-00012	M. sinensis var. condensatus 'Cabaret'	UI10-00012	1	1	15	2012-08-27	92	100	M. sinensis	UI10-00012	Japan								2013-03-01	2013-04-08	2013-04-15	2013-04-19			186	224	231	235			44	3	122.5	106.3	12	135.5	62.4	12	111.6	83.3	13	123.2	84	12.3333
UI10-00012	M. sinensis var. condensatus 'Cabaret'	UI10-00012	1	1	15	2012-08-27	93	101	M. sinensis	UI10-00012	Japan								2013-03-01	2013-03-29	2013-04-08	2013-04-12			186	214	224	228			46	3	118.5	95.2	11	120.1	94.2	10	122.6	98.6	11	120.4	96	10.6667
UI10-00012	M. sinensis var. condensatus 'Cabaret'	UI10-00012	1	1	15	2012-08-27	94	102	M. sinensis	UI10-00012	Japan								2013-03-06	2013-03-29	2013-04-01	2013-04-08			191	214	217	224			46	3	126.7	98.8	14	119.1	95.9	15	134.1	111.7	18	126.633	102.133	15.6667
PI417947	M. floridulus 'NG77-022'	PI417947	1	2	10	2012-08-27	22	73	M. floridulus	PI417947	Papua New Guinea					-3.55	143.633	5													16	0	222.6	144	18	266.2	193.5	25	266.5	195	27	251.767	177.5	23.3333
PI417947	M. floridulus 'NG77-022'	PI417947	1	2	10	2012-08-27	23	75	M. floridulus	PI417947	Papua New Guinea					-3.55	143.633	5													3	0	356.9	257.2	24	253	191.1	36	248.3	212.1	38	286.067	220.133	32.6667
PI417947	M. floridulus 'NG77-022'	PI417947	3	1	12.5	2015-06-15	309	126	M. floridulus	PI417947	Papua New Guinea					-3.55	143.633	5	2015-08-24	2015-09-08	2015-09-08	2015-09-08			70	85	85	85			28	4	265.3	197.8	23	234.5	232.5	27	291.3	275.3	31	263.7	235.2	27
PI417947	M. floridulus 'NG77-022'	PI417947	3	1	12.5	2015-06-15	310	127	M. floridulus	PI417947	Papua New Guinea					-3.55	143.633	5	2015-09-08	2015-09-14	2015-09-28	2015-09-28	2015-10-05	2015-10-05	85	91	105	105	112	112	26	8	153.1	104.8	9	200.9	151.9	25	204.6	136.5	21	186.2	131.067	18.3333
PI417947	M. floridulus 'NG77-022'	PI417947	1	1	15	2012-08-27	85	76	M. floridulus	PI417947	Papua New Guinea					-3.55	143.633	5	2012-12-26	2012-12-28	2012-12-31	2013-01-04	2013-02-08	2013-02-22	121	123	126	130	165	179	10	7	249	206.3	16	299.2	239	22	176.9	260	14	241.7	235.1	17.3333
PI417947	M. floridulus 'NG77-022'	PI417947	1	1	15	2012-08-27	86	77	M. floridulus	PI417947	Papua New Guinea					-3.55	143.633	5	2012-12-26	2012-12-28	2013-01-04	2013-01-07	2013-02-15	2013-02-22	121	123	130	133	172	179	16	10	231.9	154.9	15	240.8	179.6	16	253.3	167	22	242	167.167	17.6667
PI417947	M. floridulus 'NG77-022'	PI417947	1	1	15	2012-08-27	87	78	M. floridulus	PI417947	Papua New Guinea					-3.55	143.633	5	2013-01-07	2013-01-11	2013-01-14	2013-01-16	2013-02-15	2013-02-22	133	137	140	142	172	179	7	4	231.5	138	15	261.5	188.9	19	296.9	152.8	23	263.3	159.9	19
UI10-00008	M. sacchariflorus 'Hortico'	UI10-00008	1	2	10	2012-08-27	26	91	M. sacchariflorus										2012-10-05	2012-10-05					39	39					14	10	24.6	8.8	7	32.9	10.2	4	23.7	8.2	7	27.0667	9.06667	6
UI10-00008	M. sacchariflorus 'Hortico'	UI10-00008	1	2	10	2012-08-27	27	92	M. sacchariflorus										2012-10-05	2012-10-05					39	39					31	3	26.9	13.2	6	26.6	14.2	6	27.2	12.5	8	26.9	13.3	6.66667
UI10-00008	M. sacchariflorus 'Hortico'	UI10-00008	1	2	10	2012-08-27	28	93	M. sacchariflorus										2012-10-05	2012-10-05					39	39					21	14	48.9	11.4	7	33	18.5	5	38.8	22.2	8	40.2333	17.3667	6.66667
UI10-00008	M. sacchariflorus 'Hortico'	UI10-00008	3	1	12.5	2015-06-15	314	131	M. sacchariflorus										2015-07-20	2015-07-27	2015-07-27	2015-08-03			35	42	42	49			57	10	57	36.5	10	63	36.2	10	58.1	36.5	10	59.3667	36.4	10
UI10-00008	M. sacchariflorus 'Hortico'	UI10-00008	3	1	12.5	2015-06-15	315	132	M. sacchariflorus										2015-07-13	2015-07-13	2015-07-13	2015-07-20	2015-08-03	2015-08-03	28	28	28	35	49	49	72	11	67.2	45.2	9	68.5	38.3	12	66.5	43.8	10	67.4	42.4333	10.3333
UI10-00008	M. sacchariflorus 'Hortico'	UI10-00008	3	1	12.5	2015-06-15	316	133	M. sacchariflorus										2015-07-20	2015-07-27	2015-07-27	2015-07-27	2015-08-03	2015-08-03	35	42	42	42	49	49	45	8	48	32.8	6	51.2	36	7	45	28.6	6	48.0667	32.4667	6.33333
UI10-00008	M. sacchariflorus 'Hortico'	UI10-00008	1	1	15	2012-08-27	89	94	M. sacchariflorus										2012-10-17	2012-10-29	2012-11-02	2012-11-05	2012-11-14	2012-11-16	51	63	67	70	79	81	44	18	119.3	89	9	118.7	90	8	105.8	79	10	114.6	86	9
UI10-00008	M. sacchariflorus 'Hortico'	UI10-00008	1	1	15	2012-08-27	90	95	M. sacchariflorus										2012-10-26	2012-11-05	2012-11-09	2012-11-12	2012-11-26	2012-11-28	60	70	74	77	91	93	18	6	73.5	63.8	10	103.3	87.5	12	76.5	53.3	23	84.4333	68.2	15
UI10-00008	M. sacchariflorus 'Hortico'	UI10-00008	1	1	15	2012-08-27	91	96	M. sacchariflorus										2012-10-26	2012-11-07	2012-11-09	2012-11-12	2012-11-19	2012-11-26	60	72	74	77	84	91	18	11	112.8	81.7	8	83.9	70.6	10	108.3	65.2	19	101.667	72.5	12.3333
UI10-00041	M. sinensis 'Flamingo'	UI10-00041	1	2	10	2012-08-27	32	109	M. sinensis																						91	0	59.8	11.1	6	57	9.1	6	64.7	10.9	6	60.5	10.3667	6
UI10-00041	M. sinensis 'Flamingo'	UI10-00041	1	2	10	2012-08-27	33	110	M. sinensis																						54	0	44.7	8.2	7	60.8	12.5	10	54.3	7.7	5	53.2667	9.46667	7.33333
UI10-00041	M. sinensis 'Flamingo'	UI10-00041	1	2	10	2012-08-27	34	111	M. sinensis																						72	0	55.3	11.3	11	60.1	11.5	9	59.6	10.3	6	58.3333	11.0333	8.66667
UI10-00041	M. sinensis 'Flamingo'	UI10-00041	3	1	12.5	2015-06-15	320	137	M. sinensis										2015-07-27						42						87	2	69.3	46.8	6	77.1	45.3	8	93.5	33.5	8	79.9667	41.8667	7.33333
UI10-00041	M. sinensis 'Flamingo'	UI10-00041	3	1	12.5	2015-06-15	321	138	M. sinensis										2015-10-12						119						141	1	64.5	37.3	7	92.3	20	8	77.1	20.5	12	77.9667	25.9333	9
UI10-00041	M. sinensis 'Flamingo'	UI10-00041	3	1	12.5	2015-06-15	322	139	M. sinensis										2015-08-10						56						169	≥1	67.1	13	8	74.3	14.7	9	70	11.8	8	70.4667	13.1667	8.33333
UI10-00041	M. sinensis 'Flamingo'	UI10-00041	1	1	15	2012-08-27	95	112	M. sinensis										2012-11-19	2012-12-31	2013-01-09	2013-01-18	2013-01-23	2013-01-28	84	126	135	144	149	154	60	23	110.8	79.6	7	109.4	83.3	12	110.2	58.1	8	110.133	73.6667	9
UI10-00041	M. sinensis 'Flamingo'	UI10-00041	1	1	15	2012-08-27	96	113	M. sinensis										2012-10-05	2012-10-15	2012-11-26	2012-12-03	2013-01-16	2013-01-18	39	49	91	98	142	144	51	24	125.8	74	9	120.4	76.5	9	122	86.6	7	122.733	79.0333	8.33333
UI10-00041	M. sinensis 'Flamingo'	UI10-00041	1	1	15	2012-08-27	97	114	M. sinensis										2012-10-17	2012-11-28	2012-12-12	2012-12-26	2013-01-16	2013-01-18	51	93	107	121	142	144	33	10	135.2	105.8	8	138.4	57.5	11	142.9	110	11	138.833	91.1	10
UI10-00048	M. sinensis 'Gracillimus'	UI10-00048	1	2	10	2012-08-27	35	115	M. sinensis																						648	0	40.3	9.1	8	48.6	11.3	6	35.1	9.8	9	41.3333	10.0667	7.66667
UI10-00048	M. sinensis 'Gracillimus'	UI10-00048	1	2	10	2012-08-27	36	116	M. sinensis																						368	0	44.2	8.1	6	35.1	10.9	8	44.5	9.8	6	41.2667	9.6	6.66667
UI10-00048	M. sinensis 'Gracillimus'	UI10-00048	1	2	10	2012-08-27	37	117	M. sinensis																						376	0	38.1	9.2	9	48	9.7	7	34.2	7.9	8	40.1	8.93333	8
UI10-00048	M. sinensis 'Gracillimus'	UI10-00048	3	1	12.5	2015-06-15	323	140	M. sinensis																						87	0	69.3	13.2	7	67.8	12.5	7	63	11.5	8	66.7	12.4	7.33333
UI10-00048	M. sinensis 'Gracillimus'	UI10-00048	3	1	12.5	2015-06-15	324	141	M. sinensis																						176	0	61.8	10.1	9	60.3	11.8	7	72.5	13.2	8	64.8667	11.7	8
UI10-00048	M. sinensis 'Gracillimus'	UI10-00048	3	1	12.5	2015-06-15	325	142	M. sinensis																						198	0	66.4	12.5	8	66	12.2	9	60.9	12.5	8	64.4333	12.4	8.33333
UI10-00048	M. sinensis 'Gracillimus'	UI10-00048	1	1	15	2012-08-27	98	118	M. sinensis										2013-02-22	2013-03-01	2013-03-06	2013-03-15	2013-04-26	2013-05-01	179	186	191	200	242	247	99	23	128.2	100	9	123.6	96.4	11	118.7	85.2	3	123.5	93.8667	7.66667
UI10-00048	M. sinensis 'Gracillimus'	UI10-00048	1	1	15	2012-08-27	99	119	M. sinensis										2013-02-22	2013-02-01	2013-03-01	2013-03-06	2013-04-22	2013-04-26	179	158	186	191	238	242	111	17	121	95.8	11	137.4	51.5	14	128.8	44.6	12	129.067	63.9667	12.3333
UI10-00048	M. sinensis 'Gracillimus'	UI10-00048	1	1	15	2012-08-27	100	120	M. sinensis										2013-02-22	2013-02-01	2013-03-01	2013-03-06	2013-04-08	2013-04-15	179	158	186	191	224	231	112	17	112.7	87.2	9	136.4	34.8	12	108	30.9	14	119.033	50.9667	11.6667
UI11-00001.5	M. sinensis 'Miyazaki 1.5'	UI11-00001.5	1	2	10	2012-08-27	44	133	M. sinensis		Japan				4	31.83	131.42	30	2012-10-05	2012-10-05	2012-10-10	2012-10-10			39	39	44	44			15	0	106	18.3	9	113.9	20.6	10	108.4	19.1	10	109.433	19.3333	9.66667
UI11-00001.5	M. sinensis 'Miyazaki 1.5'	UI11-00001.5	1	2	10	2012-08-27	45	134	M. sinensis		Japan				4	31.83	131.42	30													24	0	100	17	12	107.5	19.2	10	101.9	17.1	8	103.133	17.7667	10
UI11-00001.5	M. sinensis 'Miyazaki 1.5'	UI11-00001.5	1	2	10	2012-08-27	46	135	M. sinensis		Japan				4	31.83	131.42	30													20	0	107.9	16.9	11	103.9	18.5	14	100.9	19	12	104.233	18.1333	12.3333
UI11-00001.5	M. sinensis 'Miyazaki 1.5'	UI11-00001.5	3	1	12.5	2015-06-15	330	149	M. sinensis		Japan				4	31.83	131.42	30	2015-07-27	2015-08-17	2015-08-17	2015-08-17	2015-08-17	2015-09-08	42	63	63	63	63	85	54	4	181	140.2	10	197.1	151.5	9	191.3	149.3	10	189.8	147	9.66667
UI11-00001.5	M. sinensis 'Miyazaki 1.5'	UI11-00001.5	3	1	12.5	2015-06-15	331	150	M. sinensis		Japan				4	31.83	131.42	30	2015-08-03	2015-08-10	2015-08-10	2015-08-17	2015-09-08	2015-09-08	49	56	56	63	85	85	39	4	98.1	71.5	9	139.5	109.3	10	171.2	137.7	9	136.267	106.167	9.33333
UI11-00001.5	M. sinensis 'Miyazaki 1.5'	UI11-00001.5	3	1	12.5	2015-06-15	332	151	M. sinensis		Japan				4	31.83	131.42	30	2015-07-27	2015-08-03	2015-08-10	2015-08-10	2015-09-08	2015-09-08	42	49	56	56	85	85	34	3	131.1	117.8	12	184.1	92.3	9	147.8	112.1	7	154.333	107.4	9.33333
UI11-00001.5	M. sinensis 'Miyazaki 1.5'	UI11-00001.5	1	1	15	2012-08-27	107	136	M. sinensis		Japan				4	31.83	131.42	30	2012-11-16	2012-12-28	2012-12-31	2013-01-04	2013-03-15	2013-03-29	81	123	126	130	200	214	40	5	141.2	91.7	9	140.3	88.8	9	135.9	91.9	10	139.133	90.8	9.33333
UI11-00001.5	M. sinensis 'Miyazaki 1.5'	UI11-00001.5	1	1	15	2012-08-27	108	137	M. sinensis		Japan				4	31.83	131.42	30	2013-01-09	2013-01-30	2013-02-08	2013-02-15	2013-03-06	2013-03-15	135	156	165	172	191	200	15	4	157.4	104.4	8	190.3	67.1	9	202.2	73.3	10	183.3	81.6	9
UI11-00001.5	M. sinensis 'Miyazaki 1.5'	UI11-00001.5	1	1	15	2012-08-27	109	138	M. sinensis		Japan				4	31.83	131.42	30	2013-02-22	2013-03-01	2013-03-06	2013-03-15	2013-04-08	2013-04-15	179	186	191	200	224	231	14	7	152.8	102.6	11	148	94.6	8	160	103.1	10	153.6	100.1	9.66667
UI11-00002.4	M. sinensis 'Sugadaira 2.4'	UI11-00002.4	1	2	10	2012-08-27	47	139	M. sinensis		Japan				6 high	36	138.12	1120													80	0	45.2	10.3	6	42.8	8	4	59	11.1	6	49	9.8	5.33333
UI11-00002.4	M. sinensis 'Sugadaira 2.4'	UI11-00002.4	1	2	10	2012-08-27	48	140	M. sinensis		Japan				6 high	36	138.12	1120													77	0	59.6	12.7	6	60.3	6.1	4	64.3	14.3	5	61.4	11.0333	5
UI11-00002.4	M. sinensis 'Sugadaira 2.4'	UI11-00002.4	1	2	10	2012-08-27	49	141	M. sinensis		Japan				6 high	36	138.12	1120													52	0	61.4	15.4	13	53.1	9.3	12	55.3	9.3	9	56.6	11.3333	11.3333
UI11-00002.4	M. sinensis 'Sugadaira 2.4'	UI11-00002.4	3	1	12.5	2015-06-15	333	152	M. sinensis		Japan				6 high	36	138.12	1120													81	0	53.1	12.9	11	58.2	15	13	52.1	13.1	10	54.4667	13.6667	11.3333
UI11-00002.4	M. sinensis 'Sugadaira 2.4'	UI11-00002.4	3	1	12.5	2015-06-15	334	153	M. sinensis		Japan				6 high	36	138.12	1120													63	0	55	16	11	51.1	10.3	7	63.1	12.3	10	56.4	12.8667	9.33333
UI11-00002.4	M. sinensis 'Sugadaira 2.4'	UI11-00002.4	3	1	12.5	2015-06-15	335	154	M. sinensis		Japan				6 high	36	138.12	1120													42	0	61.8	15.7	10	63.8	13.9	12	55.2	14.8	11	60.2667	14.8	11
UI11-00002.4	M. sinensis 'Sugadaira 2.4'	UI11-00002.4	1	1	15	2012-08-27	110	142	M. sinensis		Japan				6 high	36	138.12	1120	2012-10-22	2012-11-14	2012-11-28	2012-12-03	2012-12-26	2012-12-31	56	79	93	98	121	126	63	15	102.6	75.6	8	109.8	92.9	8	120.3	97.3	9	110.9	88.6	8.33333
UI11-00002.4	M. sinensis 'Sugadaira 2.4'	UI11-00002.4	1	1	15	2012-08-27	111	143	M. sinensis		Japan				6 high	36	138.12	1120	2012-10-22	2012-11-09	2012-11-28	2012-12-03	2012-12-10	2012-12-12	56	74	93	98	105	107	51	10	139	100.7	8	111.5	72.1	7	114.6	86.7	13	121.7	86.5	9.33333
UI11-00002.4	M. sinensis 'Sugadaira 2.4'	UI11-00002.4	1	1	15	2012-08-27	112	144	M. sinensis		Japan				6 high	36	138.12	1120	2012-10-22	2012-11-07	2012-11-26	2012-11-28	2012-12-05	2012-12-07	56	72	91	93	100	102	59	14	151.9	116.3	10	127.7	103.2	11	136.2	101.1	9	138.6	106.867	10
UI11-00003.3	M. sinensis 'Teshio 3.3'	UI11-00003.3	1	2	10	2012-08-27	50	145	M. sinensis		Japan				12	44.9167	141.983	100													60	0	59.3	13.4	7	60.3	14.9	8	54.9	13.4	8	58.1667	13.9	7.66667
UI11-00003.3	M. sinensis 'Teshio 3.3'	UI11-00003.3	1	2	10	2012-08-27	51	146	M. sinensis		Japan				12	44.9167	141.983	100													54	0	68.9	15.5	11	64.4	13.6	7	64.1	15.8	8	65.8	14.9667	8.66667
UI11-00003.3	M. sinensis 'Teshio 3.3'	UI11-00003.3	1	2	10	2012-08-27	52	147	M. sinensis		Japan				12	44.9167	141.983	100													52	0	69.9	17.2	9	63.9	13.6	7	64.7	14.8	7	66.1667	15.2	7.66667
UI11-00003.3	M. sinensis 'Teshio 3.3'	UI11-00003.3	3	1	12.5	2015-06-15	336	155	M. sinensis		Japan				12	44.9167	141.983	100													11	0	48.1	9.5	10	56.5	10.2	8	46.3	8.8	9	50.3	9.5	9
UI11-00003.3	M. sinensis 'Teshio 3.3'	UI11-00003.3	3	1	12.5	2015-06-15	337	156	M. sinensis		Japan				12	44.9167	141.983	100													84	0	56.5	14.6	11	51.3	14.3	10	56.7	13.3	10	54.8333	14.0667	10.3333
UI11-00003.3	M. sinensis 'Teshio 3.3'	UI11-00003.3	3	1	12.5	2015-06-15	338	157	M. sinensis		Japan				12	44.9167	141.983	100													53	0	52.1	15	10	49.1	14	9	46.1	13.1	10	49.1	14.0333	9.66667
UI11-00003.3	M. sinensis 'Teshio 3.3'	UI11-00003.3	1	1	15	2012-08-27	113	148	M. sinensis		Japan				12	44.9167	141.983	100	2012-10-10	2012-10-22	2012-10-29	2012-11-02			44	56	63	67			25	6	279.3	221.9	13	214.5	174.9	13	252.3	202	13	248.7	199.6	13
UI11-00003.3	M. sinensis 'Teshio 3.3'	UI11-00003.3	1	1	15	2012-08-27	114	149	M. sinensis		Japan				12	44.9167	141.983	100	2012-10-10	2012-10-17	2012-10-26	2012-10-31			44	51	60	65			31	8	215.6	164.9	13	235.5	194.5	15	223.3	176.3	18	224.8	178.567	15.3333
UI11-00003.3	M. sinensis 'Teshio 3.3'	UI11-00003.3	1	1	15	2012-08-27	115	150	M. sinensis		Japan				12	44.9167	141.983	100	2012-10-10	2012-10-17	2012-10-29	2012-11-02			44	51	63	67			32	5	244.5	192.4	12	217.9	159	9	202.6	145.6	15	221.667	165.667	12
OKA-2010-001	M. sinensis 'Onna-1'	OKA-2010-001	1	2	10	2012-08-27	13	43	M. sinensis	2010-OKA-001	Japan	Okinawa	Onna		2	26.4459	127.806	48.18													37	0	116.9	45.9	11	102	51.5	15	108.4	35.4	10	109.1	44.2667	12
OKA-2010-001	M. sinensis 'Onna-1'	OKA-2010-001	1	2	10	2012-08-27	14	49	M. sinensis	2010-OKA-001	Japan	Okinawa	Onna		2	26.4459	127.806	48.18													51	0	121.5	70.8	16	123.2	70.9	14	131.9	72.1	13	125.533	71.2667	14.3333
OKA-2010-001	M. sinensis 'Onna-1'	OKA-2010-001	1	2	10	2012-08-27	15	56	M. sinensis	2010-OKA-001	Japan	Okinawa	Onna		2	26.4459	127.806	48.18													77	0	132.9	67.1	11	133.3	65.6	12	137.2	75.1	15	134.467	69.2667	12.6667
OKA-2010-001	M. sinensis 'Onna-1'	OKA-2010-001	3	1	12.5	2015-06-15	303	116	M. sinensis	2010-OKA-001	Japan	Okinawa	Onna		2	26.4459	127.806	48.18													48	0	157.8	69.2	10	151	70.5	10	149.3	66.7	9	152.7	68.8	9.66667
OKA-2010-001	M. sinensis 'Onna-1'	OKA-2010-001	3	1	12.5	2015-06-15	304	117	M. sinensis	2010-OKA-001	Japan	Okinawa	Onna		2	26.4459	127.806	48.18													52	0	188.5	105	13	186.3	104.5	13	187.2	106.3	13	187.333	105.267	13
OKA-2010-001	M. sinensis 'Onna-1'	OKA-2010-001	1	1	15	2012-08-27	76	46	M. sinensis	2010-OKA-001	Japan	Okinawa	Onna		2	26.4459	127.806	48.18	2013-05-13	2013-05-17	2013-05-27	2013-05-29	2013-06-10	2013-06-17	259	263	273	275	287	294	43	13	185	111.1	17	187.7	134.3	16	194.4	116.8	15	189.033	120.733	16
OKA-2010-001	M. sinensis 'Onna-1'	OKA-2010-001	1	1	15	2012-08-27	77	52	M. sinensis	2010-OKA-001	Japan	Okinawa	Onna		2	26.4459	127.806	48.18	2013-06-26	2013-07-03	2013-07-10				303	310	317				48	4	190.3	129.5	13	185	132.6	12	196.3	140	12	190.533	134.033	12.3333
OKA-2010-001	M. sinensis 'Onna-1'	OKA-2010-001	1	1	15	2012-08-27	78	59	M. sinensis	2010-OKA-001	Japan	Okinawa	Onna		2	26.4459	127.806	48.18	2013-05-10	2013-05-17	2013-05-24	2013-05-27	2013-06-10	2013-06-17	256	263	270	273	287	294	45	24	189.4	136.8	13	185.8	132.2	14	181.3	135.7	14	185.5	134.9	13.6667
PI 598103	S bicolor 'SM100'	PI 598103	2	2	12.5	2014-01-20	181	58	S. bicolor	ma1Ma2Ma3Ma4									2014-03-17	2014-03-21	2014-03-24	2014-03-28	2014-03-31	2014-03-31	56	60	63	67	70	70	22	13	122	78.5	11	114	72	5	121	79	6	119	76.5	7.33333
PI 598103	S bicolor 'SM100'	PI 598103	2	2	12.5	2014-01-20	182	59	S. bicolor	ma1Ma2Ma3Ma4									2014-03-21	2014-03-28	2014-03-31	2014-04-04	2014-04-07	2014-04-07	60	67	70	74	77	77	19	8	108	57	16	131	86	6	89	60	6	109.333	67.6667	9.33333
PI 598103	S bicolor 'SM100'	PI 598103	2	1	15	2014-01-20	237	118	S. bicolor	ma1Ma2Ma3Ma4									2014-03-28	2014-03-28	2014-03-31	2014-04-04	2014-04-07	2014-04-07	67	67	70	74	77	77	5	5	98	68	6	101	56	8	118	68	13	105.667	64	9
PI 598103	S bicolor 'SM100'	PI 598103	2	1	15	2014-01-20	238	119	S. bicolor	ma1Ma2Ma3Ma4									2014-03-24	2014-03-24	2014-03-28	2014-03-31	2014-03-31	2014-04-04	63	63	67	70	70	74	5	5	105	73	5	108	72	8	116	79	8	109.667	74.6667	7
PI 598103	S bicolor 'SM100'	PI 598103	2	1	15	2014-01-20	239	120	S. bicolor	ma1Ma2Ma3Ma4									2014-03-28	2014-03-28	2014-04-04	2014-04-04	2014-04-07	2014-04-07	67	67	74	74	77	77	2	2	87	53	8	90	51	9				59	34.6667	5.66667
Tōhoku-2010-015a	M. sinensis 'Tōhoku-2010-015a'	Tōhoku-2010-015a	1	2	10	2012-08-27	24	85	M. sinensis		Japan	Akita	Noshiroshi	Futatsuimachitane	9	40.216	140.226	19.6	2012-10-05						39						53	1	75.7	16.1	8	64.9	14.1	7	68.8	14.9	11	69.8	15.0333	8.66667
Tōhoku-2010-015a	M. sinensis 'Tōhoku-2010-015a'	Tōhoku-2010-015a	1	2	10	2012-08-27	25	86	M. sinensis		Japan	Akita	Noshiroshi	Futatsuimachitane	9	40.216	140.226	19.6	2012-10-05						39						87	0	55.2	16.1	9	52.5	14.4	8	60.6	18.4	8	56.1	16.3	8.33333
Tōhoku-2010-015a	M. sinensis 'Tōhoku-2010-015a'	Tōhoku-2010-015a	3	1	12.5	2015-06-15	311	128	M. sinensis		Japan	Akita	Noshiroshi	Futatsuimachitane	9	40.216	140.226	19.6													143	0	85.1	24.4	13	80.2	19.6	9	86.7	19.3	9	84	21.1	10.3333
Tōhoku-2010-015a	M. sinensis 'Tōhoku-2010-015a'	Tōhoku-2010-015a	3	1	12.5	2015-06-15	312	129	M. sinensis		Japan	Akita	Noshiroshi	Futatsuimachitane	9	40.216	140.226	19.6													90	0	53.1	16.3	8	54.3	13.1	11	54.8	12.5	9	54.0667	13.9667	9.33333
Tōhoku-2010-015a	M. sinensis 'Tōhoku-2010-015a'	Tōhoku-2010-015a	3	1	12.5	2015-06-15	313	130	M. sinensis		Japan	Akita	Noshiroshi	Futatsuimachitane	9	40.216	140.226	19.6													79	0	57.8	13.7	9	56.2	13.2	11	65.5	15.3	10	59.8333	14.0667	10
Tōhoku-2010-015a	M. sinensis 'Tōhoku-2010-015a'	Tōhoku-2010-015a	1	1	15	2012-08-27	88	88	M. sinensis		Japan	Akita	Noshiroshi	Futatsuimachitane	9	40.216	140.226	19.6	2012-11-07	2012-11-14	2012-12-03	2012-12-10	2013-01-16	2013-01-18	72	79	98	105	142	144	38	16	223.6	173.4	19	228.3	176.8	20	235.5	176.7	17	229.133	175.633	18.6667
OKA-2010-002	M. sinensis 'Uruma-1b'	OKA-2010-002	1	2	10	2012-08-27	16	61	M. sinensis	2010-OKA-002	Japan	Okinawa	Uruma		1	26.3403	127.855	5.703													76	0	154	90.6	19	169.4	103	15	173.5	95.6	19	165.633	96.4	17.6667
OKA-2010-002	M. sinensis 'Uruma-1b'	OKA-2010-002	1	2	10	2012-08-27	17	62	M. sinensis	2010-OKA-002	Japan	Okinawa	Uruma		1	26.3403	127.855	5.703													66	0	165	84.3	14	151.2	80.8	17	160.2	81.2	13	158.8	82.1	14.6667
OKA-2010-002	M. sinensis 'Uruma-1b'	OKA-2010-002	1	2	10	2012-08-27	18	63	M. sinensis	2010-OKA-002	Japan	Okinawa	Uruma		1	26.3403	127.855	5.703													79	0	169.8	94.2	13	165	95.3	15	169.6	92.7	17	168.133	94.0667	15
OKA-2010-002	M. sinensis 'Uruma-1b'	OKA-2010-002	3	1	12.5	2015-06-15	305	121	M. sinensis	2010-OKA-002	Japan	Okinawa	Uruma		1	26.3403	127.855	5.703													78	0	135.5	67.1	10	153.6	66.1	13	158.6	83.6	18	149.233	72.2667	13.6667
OKA-2010-002	M. sinensis 'Uruma-1b'	OKA-2010-002	1	1	15	2012-08-27	79	64	M. sinensis	2010-OKA-002	Japan	Okinawa	Uruma		1	26.3403	127.855	5.703	2013-07-29	2013-08-12	2013-08-22				336	350	360				59	4	174.2	94.7	15	174.8	95	14	188.8	115.2	16	179.267	101.633	15
OKA-2010-002	M. sinensis 'Uruma-1b'	OKA-2010-002	1	1	15	2012-08-27	80	65	M. sinensis	2010-OKA-002	Japan	Okinawa	Uruma		1	26.3403	127.855	5.703	2013-07-29	2013-08-05	2013-08-16	2013-08-22			336	343	354	360			48	2	186.2	88.8	13	176	91.7	13	179.8	91.3	14	180.667	90.6	13.3333
OKA-2010-002	M. sinensis 'Uruma-1b'	OKA-2010-002	1	1	15	2012-08-27	81	66	M. sinensis	2010-OKA-002	Japan	Okinawa	Uruma		1	26.3403	127.855	5.703	2013-07-29	2013-08-22					336	360					42	2	153.7	104	9	192.8	101	14	197.5	110.4	16	181.333	105.133	13

## Sheet: Avg temps Champaign, IL
Month	Avg.	Avg.	Mean	Avg.	Record	Record		Month	Avg.	Avg.	Mean	Avg.	Record	Record
	High	Low		Precip	High	Low			High	Low		Precip	High	Low
Jan	33°F	17°F	25°F	2.05 in.	70°F (1909)	-25°F (1999)		Jan	1°C	-8°C	-4°C	52.1 mm	21°C (1909)	-32°C (1999)
Feb	38°F	20°F	29°F	2.21 in.	72°F (2000)	-25°F (1905)		Feb	3°C	-7°C	-2°C	56.1 mm	22°C (2000)	-32°C (1905)
Mar	50°F	30°F	40°F	2.86 in.	85°F (1910)	-5°F (1906)		Mar	10°C	-1°C	4°C	72.6 mm	29°C (1910)	-21°C (1906)
Apr	63°F	41°F	52°F	3.68 in.	91°F (1986)	16°F (1982)		Apr	17°C	5°C	11°C	93.5 mm	33°C (1986)	-9°C (1982)
May	73°F	52°F	63°F	4.89 in.	97°F (1934)	26°F (1903)		May	23°C	11°C	17°C	124.2 mm	36°C (1934)	-3°C (1903)
Jun	83°F	62°F	73°F	4.34 in.	103°F (1988)	37°F (1945)		Jun	28°C	17°C	23°C	110.2 mm	39°C (1988)	3°C (1945)
Jul	85°F	65°F	75°F	4.70 in.	109°F (1954)	41°F (1904)		Jul	29°C	18°C	24°C	119.4 mm	43°C (1954)	5°C (1904)
Aug	84°F	63°F	74°F	3.93 in.	102°F (1988)	39°F (1915)		Aug	29°C	17°C	23°C	99.8 mm	39°C (1988)	4°C (1915)
Sep	78°F	54°F	66°F	3.13 in.	101°F (1954)	29°F (1942)		Sep	26°C	12°C	19°C	79.5 mm	38°C (1954)	-2°C (1942)
Oct	65°F	43°F	54°F	3.26 in.	93°F (1954)	13°F (1925)		Oct	18°C	6°C	12°C	82.8 mm	34°C (1954)	-11°C (1925)
Nov	51°F	32°F	42°F	3.68 in.	80°F (1950)	-5°F (1950)		Nov	11°C	0°C	6°C	93.5 mm	27°C (1950)	-21°C (1950)
Dec	37°F	21°F	29°F	2.73 in.	71°F (1998)	-20°F (1983)		Dec	3°C	-6°C	-2°C	69.3 mm	22°C (1998)	-29°C (1983)
http://www.weather.com/weather/wxclimatology/monthly/USIL0209
For Expt1 choose 28 C day and 17 C night or an average of 23 C.
Sunrise at 5:30 a.m. and sunset at 8:30 p.m. for 15 hr days.
http://www.sunrisesunset.com/calendar.asp
2012-06-01
Urbana, Illinois, USA
Latitude, Longitude: 40 06.5' N, 88 12.3' W Time zone: -6:00 (Central) DST observance: North America
Sunday	Monday	Tuesday	Wednesday	Thursday	Friday	Saturday
					1	2
					Sunrise: 5:26am	Sunrise: 5:25am
					Sunset: 8:16pm	Sunset: 8:16pm
3	4	5	6	7	8	9
Sunrise: 5:25am	Sunrise: 5:25am	Sunrise: 5:24am	Sunrise: 5:24am	Sunrise: 5:24am	Sunrise: 5:24am	Sunrise: 5:23am
Sunset: 8:17pm	Sunset: 8:18pm	Sunset: 8:18pm	Sunset: 8:19pm	Sunset: 8:20pm	Sunset: 8:20pm	Sunset: 8:21pm
	Full Moon: 6:13am
10	11	12	13	14	15	16
Sunrise: 5:23am	Sunrise: 5:23am	Sunrise: 5:23am	Sunrise: 5:23am	Sunrise: 5:23am	Sunrise: 5:23am	Sunrise: 5:23am
Sunset: 8:21pm	Sunset: 8:22pm	Sunset: 8:22pm	Sunset: 8:23pm	Sunset: 8:23pm	Sunset: 8:24pm	Sunset: 8:24pm
	Last Qtr: 5:42am
17	18	19	20	21	22	23
Sunrise: 5:23am	Sunrise: 5:23am	Sunrise: 5:23am	Sunrise: 5:24am	Sunrise: 5:24am	Sunrise: 5:24am	Sunrise: 5:24am
Sunset: 8:24pm	Sunset: 8:25pm	Sunset: 8:25pm	Sunset: 8:25pm	Sunset: 8:25pm	Sunset: 8:26pm	Sunset: 8:26pm
		New Moon: 10:03am
24	25	26	27	28	29	30
Sunrise: 5:25am	Sunrise: 5:25am	Sunrise: 5:25am	Sunrise: 5:26am	Sunrise: 5:26am	Sunrise: 5:26am	Sunrise: 5:27am
Sunset: 8:26pm	Sunset: 8:26pm	Sunset: 8:26pm	Sunset: 8:26pm	Sunset: 8:26pm	Sunset: 8:26pm	Sunset: 8:26pm
		First Qtr: 10:32pm

## Sheet: Protocol
In Expt1, plants will be established under constant long days (15 h). After 30 d establishment, the stems of all plants will be cut and half the plants (1 chamber) will be grown under short days (10 h), while the other half continue to receive long days.
23 C constant.
Sunrise at 5:30 a.m. and sunset at 8:30 p.m. for 15 hr days.
Data will be collected on dates of booting, heading and flowering, along with height and number of nodes for mature shoots.
	Day Start	Day End	Irrigation Times (Duration)	# of times Irrigated per day
10 hr Days Chamber Conditions
50% Humidity, 23 C, 95% Fan Speed	05:30:00	15:30:00	7:30 (1 min)	3
			8:30 (1 min)
			9:30 (1 min)
	Day Start	Day End	Irrigation Times (Duration)	# of times Irrigated per day
15 hr Days Chamber Conditions
50% Humidity, 23 C, 95% Fan Speed	05:30:00	20:30:00	7:30 (1 min)	4
			8:30 (1 min)
			9:30 (1 min)
			11:30 (1 min)
Conditions collected by Benjamin Baechle on Sept 24, 2013

## Sheet: Notes Expt1
Date	Who	Note				2013-06-17	80
2012-07-16	Erik Sacks	Sorghum planted in chamber. Start of 15 hr day pre-treatment. 13 Aug will be 4 wk post-start.
2012-08-27	Erik Sacks	Plants cut to 5 cm above soil and light treatment (15 h for chamber 1 and 10 h for chamber 2) was initiated on Monday 27 August 2012, 6 wk after pre-treatment started. 1 tsp of 13-13-13 Osmocote fertilizer was also added to each pot.		2013-02-11	28 days * 6 months=168 days	42
2012-08-27	Erik Sacks	For sorghum control pots, old refers to plants seeded on 13 Aug and cut to 5 cm on 27 Aug, whereas new refers to plants seeded on 27 Aug.		2013-04-08	28 days * 8 months=224 days
				2013-05-06	28 days * 9 months=252 days
2013-01-25	Logan Smith	Treated each pots with 2/3 tbsp Mantra 1G. Automated watering system shut off for 1 week to allow uptake. Watering each pot every other day, spot watering as needed.	# days of the Trial:	2013-06-03	28 days * 10 months=280 days
2013-09-04	Erik Sacks	Data taken on 10 h chamber, and plants put in hoop house. Currently daylength is: 12h 54m 08s.	373	2013-07-01	28 days * 11 months=308 days
		12h 51m 34s on 5Sep2013		2013-07-29	28 days * 12 months=336 days
2013-09-06	Colten Maertens	Data taken 5-6 Sep on 15 h chamber, and plants put in hoop house.
2013-09-09	Colten Maertens	The following procedure was used for measuring culm length: if no flowers were present, then the measurement was from the shoot base to longest leaf tip; if a flower was present, then the measurement was from shoot base to the tip of the flower stalk.
2013-09-09	Ben Baechle	Cut back 15hr/day plants
2013-09-05
374	Erik Sacks	# Days in Trial from Cut Date

## Sheet: Notes Expt2
Date	Who	Note				2014-08-25	135
2013-11-25	Erik Sacks	Put Miscanthus plants in growth chamber and planted sorghum seed. Start of 15 hr day pre-treatment.		4 wk = 23 Dec, 6 wk =6 Jan , 8 wk = 20 Jan
2014-01-20	Erik Sacks	Plants cut to 5 cm above soil and light treatment (15 h for chamber 1 and 12.5 h for chamber 2) was initiated on 20 January 2014, 8 wk after pre-treatment started. 1 tsp of 13-13-13 Osmocote fertilizer was also added to each pot.		2014-07-07	28 days * 6 months=168 days
				2014-09-01	28 days * 8 months=224 days
				2014-09-29	28 days * 9 months=252 days
			# days of the Trial:	2014-10-27	28 days * 10 months=280 days
			-41659	2014-11-24	28 days * 11 months=308 days
				2014-12-22	28 days * 12 months=336 days
2013-12-02	Ben Baechle	Took Chamber Inventory
	Ben Baechle	1 Tbsp Osmocoat Added to Each Pot
2014-01-20	Erik Sacks	Plants Cut Back
2014-01-21	Ben Baechle	Safari Applied - 1 Tsp per Gallon
2014-02-21	Ben Baechle	M-Pede Applied - 10 Tbs per Gallon (4%)
2014-08-11	Ben Baechle	2 Tbsp Osmocote Addeded to Each Pot
2014-08-22	Ben Baechle	Increased watering to 1 min, 5 times per day
2015-01-07	Ben Baechle	Began taking end of GC portion data (stem count, length, etc)
2015-01-13	Ben Baechle	Finished taking end of GC portion data
2015-01-15	Ben Baechle	Plants cut back and moved to Rm 6 PA
352	Erik Sacks	# Days in Trial from Cut Date

## Sheet: Notes Expt3
Date	Who	Note				2015-11-16	134
2015-04-15	Erik Sacks	Put Miscanthus plants in growth chamber and planted sorghum seed. Start of 15 hr day pre-treatment.		4 wk = 23 Dec, 6 wk =6 Jan , 8 wk = 20 Jan
2015-06-15	Erik Sacks	Plants cut to 5 cm above soil and light treatment (10 h for chamber 2 and 12.5 h for chamber 1) was initiated on 15 June 2015, ~8 wk after pre-treatment started. 1 tsp of 17-5-11 Osmocote fertilizer was also added to each pot.		2015-11-30	28 days * 6 months=168 days
				2016-01-25	28 days * 8 months=224 days
				2016-02-22	28 days * 9 months=252 days
			# days of the Trial:	2016-03-21	28 days * 10 months=280 days
2016-03-29	Erik Sacks	Ended Expt	288	2016-04-18	28 days * 11 months=308 days
				2016-05-16	28 days * 12 months=336 days
2015-05-03	Ben Baechle	Safari Applied to pots	3 tsp/gal	6oz dilute solution/pot

## Sheet: Pivot
Count of Plant # (new)	Day Length (hr)					Average of # days to 1st flag leaf 2011	Day Length (hr)					Count of # days to 1st flag leaf 2011	Day Length (hr)					Average of # days to 1st flowering date 2011	Day Length (hr)					Count of # days to 1st flowering date 2011	Day Length (hr)					Average of # days to 50% flowering date 2011	Day Length (hr)					Count of # days to 50% flowering date 2011	Day Length (hr)
Name	10	12.5	15	Grand Total		Name	10	12.5	15	Grand Total		Name	10	12.5	15	Grand Total		Name	10	12.5	15	Grand Total		Name	10	12.5	15	Grand Total		Name	10	12.5	15	Grand Total		Name	10	12.5	15	Grand Total	Lat	Groups Consensus
M. sinensis 'PMS-130'	3	3	3	9		M. sinensis 'PMS-130'	35	42	59.6667	46.5714		M. sinensis 'PMS-130'	3	1	3	7		M. sinensis 'PMS-130'	42		119.333	100		M. sinensis 'PMS-130'	1		3	4		M. sinensis 'PMS-130'			163.667	163.667		M. sinensis 'PMS-130'			3	3	33.4555	Yangtze-Qinling Msi
M. sinensis 'PMS-159'	3	3	3	9		M. sinensis 'PMS-159'	77	42	58.3333	61.8333		M. sinensis 'PMS-159'	2	1	3	6		M. sinensis 'PMS-159'			96	96		M. sinensis 'PMS-159'			3	3		M. sinensis 'PMS-159'			112	112		M. sinensis 'PMS-159'			3	3	34.1295	Yangtze-Qinling Msi
M. sinensis 'PMS-161'	3	3	3	9		M. sinensis 'PMS-161'	98		74	80		M. sinensis 'PMS-161'	1		3	4		M. sinensis 'PMS-161'			132.667	132.667		M. sinensis 'PMS-161'			3	3		M. sinensis 'PMS-161'			148.667	148.667		M. sinensis 'PMS-161'			3	3	35.722	Yangtze-Qinling Msi
M. sinensis 'PMS-164'	3	3	3	9		M. sinensis 'PMS-164'			95	95		M. sinensis 'PMS-164'			3	3		M. sinensis 'PMS-164'			130	130		M. sinensis 'PMS-164'			3	3		M. sinensis 'PMS-164'			144	144		M. sinensis 'PMS-164'			3	3	37.34	Yangtze-Qinling Msi
M. sinensis 'PMS-204'	3	3	3	9		M. sinensis 'PMS-204'			112	112		M. sinensis 'PMS-204'			3	3		M. sinensis 'PMS-204'			169.667	169.667		M. sinensis 'PMS-204'			3	3		M. sinensis 'PMS-204'			189	189		M. sinensis 'PMS-204'			3	3	31.7013	Yangtze-Qinling Msi
M. sinensis 'PMS-226'	3	3	3	9		M. sinensis 'PMS-226'	42	46.6667	88	58.8889		M. sinensis 'PMS-226'	3	3	3	9		M. sinensis 'PMS-226'	56	76.3333	189.333	107.222		M. sinensis 'PMS-226'	3	3	3	9		M. sinensis 'PMS-226'	67.6667	85.3333	222	125		M. sinensis 'PMS-226'	3	3	3	9	26.6206	Sichuan Msi
M. sinensis 'PMS-306'	3	3	3	9		M. sinensis 'PMS-306'		65.6667	127	96.3333		M. sinensis 'PMS-306'		3	3	6		M. sinensis 'PMS-306'		84	173.333	128.667		M. sinensis 'PMS-306'		3	3	6		M. sinensis 'PMS-306'		179	200	191.6		M. sinensis 'PMS-306'		2	3	5	29.8918	Yangtze-Qinling Msi
M. sinensis 'PMS-314'	3	3	3	9		M. sinensis 'PMS-314'	57		125.667	91.3333		M. sinensis 'PMS-314'	3		3	6		M. sinensis 'PMS-314'			166.333	166.333		M. sinensis 'PMS-314'			3	3		M. sinensis 'PMS-314'			179	179		M. sinensis 'PMS-314'			3	3	26.5279	Yangtze-Qinling Msi
M. sinensis 'PMS-347'	3	3	3	9		M. sinensis 'PMS-347'	59.5	62	225.667	122.75		M. sinensis 'PMS-347'	2	3	3	8		M. sinensis 'PMS-347'	81	91	246.667	146.875		M. sinensis 'PMS-347'	2	3	3	8		M. sinensis 'PMS-347'	94.5	103.667		100		M. sinensis 'PMS-347'	2	3		5	24.168	SE China Msi
M. sinensis 'PMS-359'	3	3	3	9		M. sinensis 'PMS-359'	42	55.3333	180	98.75		M. sinensis 'PMS-359'	2	3	3	8		M. sinensis 'PMS-359'	63	80.6667	179	91.1667		M. sinensis 'PMS-359'	2	3	1	6		M. sinensis 'PMS-359'	91	93.6667		93		M. sinensis 'PMS-359'	1	3		4	22.9134	SE China Msi
M. sinensis 'PMS-375'	3	3	3	9		M. sinensis 'PMS-375'	63	96.3333		83		M. sinensis 'PMS-375'	2	3		5		M. sinensis 'PMS-375'	91	141.667		121.4		M. sinensis 'PMS-375'	2	3		5		M. sinensis 'PMS-375'		147.667		147.667		M. sinensis 'PMS-375'		3		3	19.6304	SE China Msi
M. sinensis 'PMS-382'	3	3	3	9		M. sinensis 'PMS-382'	81	135.667		113.8		M. sinensis 'PMS-382'	2	3		5		M. sinensis 'PMS-382'	91	183.667		146.6		M. sinensis 'PMS-382'	2	3		5		M. sinensis 'PMS-382'	105	205.667		180.5		M. sinensis 'PMS-382'	1	3		4	18.9056	SE China Msi
M. sinensis 'PMS-436'	3	3	3	9		M. sinensis 'PMS-436'			75	75		M. sinensis 'PMS-436'			3	3		M. sinensis 'PMS-436'			115	115		M. sinensis 'PMS-436'			3	3		M. sinensis 'PMS-436'			130.667	130.667		M. sinensis 'PMS-436'			3	3	41.317	Korea, N China Msi
M. sinensis 'PMS-438'	3	3	3	9		M. sinensis 'PMS-438'	35	53	42	43.3333		M. sinensis 'PMS-438'	3	3	3	9		M. sinensis 'PMS-438'			71.6667	71.6667		M. sinensis 'PMS-438'			3	3		M. sinensis 'PMS-438'			106	106		M. sinensis 'PMS-438'			3	3	41.3288	Korea, N China Msi
M. sinensis var. condensatus 'Cabaret'	3	3	3	9		M. sinensis var. condensatus 'Cabaret'		102.667	187.667	145.167		M. sinensis var. condensatus 'Cabaret'		3	3	6		M. sinensis var. condensatus 'Cabaret'		108.5	229	180.8		M. sinensis var. condensatus 'Cabaret'		2	3	5		M. sinensis var. condensatus 'Cabaret'						M. sinensis var. condensatus 'Cabaret'					0	C Japan Msi
S. bicolor '100M'	2	3	5	10		S. bicolor '100M'	44	59.6667	124.8	89.1		S. bicolor '100M'	2	3	5	10		S. bicolor '100M'	52	72.6667	138.2	101.3		S. bicolor '100M'	2	3	5	10		S. bicolor '100M'		90.3333	128.667	109.5		S. bicolor '100M'		3	3	6	0	0
S. bicolor '100M-new'	2		2	4		S. bicolor '100M-new'	73.5		239	156.25		S. bicolor '100M-new'	2		2	4		S. bicolor '100M-new'	82.5		254.5	168.5		S. bicolor '100M-new'	2		2	4		S. bicolor '100M-new'						S. bicolor '100M-new'					#N/A	#N/A
S. bicolor '38M'	2	3	4	9		S. bicolor '38M'	47.5	48.3333	38.5	43.7778		S. bicolor '38M'	2	3	4	9		S. bicolor '38M'	59.5	59.6667	49.5	55.1111		S. bicolor '38M'	2	3	4	9		S. bicolor '38M'		64.3333	51.6667	58		S. bicolor '38M'		3	3	6	0	0
S. bicolor '38M-new'	2		2	4		S. bicolor '38M-new'	65		46.5	55.75		S. bicolor '38M-new'	2		2	4		S. bicolor '38M-new'	75.5		55.5	65.5		S. bicolor '38M-new'	2		2	4		S. bicolor '38M-new'						S. bicolor '38M-new'					#N/A	#N/A
S. bicolor '58M'	2		2	4		S. bicolor '58M'	46		37.5	41.75		S. bicolor '58M'	2		2	4		S. bicolor '58M'	54.5		42	48.25		S. bicolor '58M'	2		2	4		S. bicolor '58M'						S. bicolor '58M'					0	0
S. bicolor '58M-new'	2		2	4		S. bicolor '58M-new'	55.5		52.5	54		S. bicolor '58M-new'	2		2	4		S. bicolor '58M-new'	65		61.5	63.25		S. bicolor '58M-new'	2		2	4		S. bicolor '58M-new'						S. bicolor '58M-new'					#N/A	#N/A
M. sinensis 'EBI-2008-32a'	3	3	3	9		M. sinensis 'EBI-2008-32a'			58	58		M. sinensis 'EBI-2008-32a'			3	3		M. sinensis 'EBI-2008-32a'			83	83		M. sinensis 'EBI-2008-32a'			3	3		M. sinensis 'EBI-2008-32a'			113.333	113.333		M. sinensis 'EBI-2008-32a'			3	3	43.3931	N Japan Msi
M. sinensis 'EBI-2008-51c'	2	3	1	6		M. sinensis 'EBI-2008-51c'		38.5	44	40.3333		M. sinensis 'EBI-2008-51c'		2	1	3		M. sinensis 'EBI-2008-51c'		42	67	54.5		M. sinensis 'EBI-2008-51c'		1	1	2		M. sinensis 'EBI-2008-51c'		42	149	95.5		M. sinensis 'EBI-2008-51c'		1	1	2	43.4482	N Japan Msi
M. sinensis 'Koike-11a'	3	3	3	9		M. sinensis 'Koike-11a'	39		87	75		M. sinensis 'Koike-11a'	1		3	4		M. sinensis 'Koike-11a'			126.333	126.333		M. sinensis 'Koike-11a'			3	3		M. sinensis 'Koike-11a'			145.333	145.333		M. sinensis 'Koike-11a'			3	3	38	C Japan Msi
M. sinensis 'Koike-12b'	1	3	1	5		M. sinensis 'Koike-12b'			93	93		M. sinensis 'Koike-12b'			1	1		M. sinensis 'Koike-12b'			130	130		M. sinensis 'Koike-12b'			1	1		M. sinensis 'Koike-12b'			144	144		M. sinensis 'Koike-12b'			1	1	36.7	C Japan Msi
M. sinensis 'Koike-21c'	3	3	3	9		M. sinensis 'Koike-21c'	39	44.3333	108.333	63.8889		M. sinensis 'Koike-21c'	3	3	3	9		M. sinensis 'Koike-21c'	49	60.6667	164.333	103.429		M. sinensis 'Koike-21c'	1	3	3	7		M. sinensis 'Koike-21c'		67.6667	188.667	128.167		M. sinensis 'Koike-21c'		3	3	6	32.16	S Japan Msi
M. ×giganteus 'Illinois'	6	6	6	18		M. ×giganteus 'Illinois'	91	51	124.5	88.4		M. ×giganteus 'Illinois'	3	6	6	15		M. ×giganteus 'Illinois'	98	70.6667	154.167	110.357		M. ×giganteus 'Illinois'	2	6	6	14		M. ×giganteus 'Illinois'		121.75	173.75	147.75		M. ×giganteus 'Illinois'		4	4	8	0	0
M. floridulus 'US56-0022-03'	3	3	3	9		M. floridulus 'US56-0022-03'		100.667		100.667		M. floridulus 'US56-0022-03'		3		3		M. floridulus 'US56-0022-03'		114.333		114.333		M. floridulus 'US56-0022-03'		3		3		M. floridulus 'US56-0022-03'		151.667		151.667		M. floridulus 'US56-0022-03'		3		3	-20.91	SE China Msi
M. sinensis 'Nippon'	3	1	3	7		M. sinensis 'Nippon'	38.6667	42	42.3333	40.7143		M. sinensis 'Nippon'	3	1	3	7		M. sinensis 'Nippon'	26	56	73.6667	60.6		M. sinensis 'Nippon'	1	1	3	5		M. sinensis 'Nippon'		63	82.3333	77.5		M. sinensis 'Nippon'		1	3	4	0	S Japan Msi
M. floridulus 'NG77-022'	2	2	3	7		M. floridulus 'NG77-022'		77.5	125	106		M. floridulus 'NG77-022'		2	3	5		M. floridulus 'NG77-022'		95	135	119		M. floridulus 'NG77-022'		2	3	5		M. floridulus 'NG77-022'		112	179	162.25		M. floridulus 'NG77-022'		1	3	4	-3.55	SE China Msi
M. sacchariflorus 'Hortico'	3	3	3	9		M. sacchariflorus 'Hortico'	39	32.6667	57	42.8889		M. sacchariflorus 'Hortico'	3	3	3	9		M. sacchariflorus 'Hortico'		42	74.6667	58.3333		M. sacchariflorus 'Hortico'		3	3	6		M. sacchariflorus 'Hortico'		49	88.3333	72.6		M. sacchariflorus 'Hortico'		2	3	5	0	NE China/Korea/Russia 2x Msa
M. sinensis 'Flamingo'	3	3	3	9		M. sinensis 'Flamingo'		72.3333	58	65.1667		M. sinensis 'Flamingo'		3	3	6		M. sinensis 'Flamingo'			121	121		M. sinensis 'Flamingo'			3	3		M. sinensis 'Flamingo'			147.333	147.333		M. sinensis 'Flamingo'			3	3	0	C Japan Msi
M. sinensis 'Gracillimus'	3	3	3	9		M. sinensis 'Gracillimus'			179	179		M. sinensis 'Gracillimus'			3	3		M. sinensis 'Gracillimus'			194	194		M. sinensis 'Gracillimus'			3	3		M. sinensis 'Gracillimus'			240	240		M. sinensis 'Gracillimus'			3	3	0	S Japan Msi
M. sinensis 'Miyazaki 1.5'	3	3	3	9		M. sinensis 'Miyazaki 1.5'	39	44.3333	131.667	81		M. sinensis 'Miyazaki 1.5'	1	3	3	7		M. sinensis 'Miyazaki 1.5'	44	60.6667	167.333	104		M. sinensis 'Miyazaki 1.5'	1	3	3	7		M. sinensis 'Miyazaki 1.5'		85	215	150		M. sinensis 'Miyazaki 1.5'		3	3	6	31.83	S Japan Msi
M. sinensis 'Sugadaira 2.4'	3	3	3	9		M. sinensis 'Sugadaira 2.4'			56	56		M. sinensis 'Sugadaira 2.4'			3	3		M. sinensis 'Sugadaira 2.4'			96.3333	96.3333		M. sinensis 'Sugadaira 2.4'			3	3		M. sinensis 'Sugadaira 2.4'			111.667	111.667		M. sinensis 'Sugadaira 2.4'			3	3	36	C Japan Msi
M. sinensis 'Teshio 3.3'	3	3	3	9		M. sinensis 'Teshio 3.3'			44	44		M. sinensis 'Teshio 3.3'			3	3		M. sinensis 'Teshio 3.3'			66.3333	66.3333		M. sinensis 'Teshio 3.3'			3	3		M. sinensis 'Teshio 3.3'						M. sinensis 'Teshio 3.3'					44.9167	N Japan Msi
M. sinensis 'Onna-1'	3	2	3	8		M. sinensis 'Onna-1'			272.667	272.667		M. sinensis 'Onna-1'			3	3		M. sinensis 'Onna-1'			274	274		M. sinensis 'Onna-1'			2	2		M. sinensis 'Onna-1'			294	294		M. sinensis 'Onna-1'			2	2	26.4459	SE China Msi
S bicolor 'SM100'		2	3	5		S bicolor 'SM100'		58	65.6667	62.6		S bicolor 'SM100'		2	3	5		S bicolor 'SM100'		70.5	72.6667	71.8		S bicolor 'SM100'		2	3	5		S bicolor 'SM100'		73.5	76	75		S bicolor 'SM100'		2	3	5	0	0
M. sinensis 'Tōhoku-2010-015a'	2	3	1	6		M. sinensis 'Tōhoku-2010-015a'	39		72	50		M. sinensis 'Tōhoku-2010-015a'	2		1	3		M. sinensis 'Tōhoku-2010-015a'			105	105		M. sinensis 'Tōhoku-2010-015a'			1	1		M. sinensis 'Tōhoku-2010-015a'			144	144		M. sinensis 'Tōhoku-2010-015a'			1	1	40.216	N Japan Msi
M. sinensis 'Uruma-1b'	3	1	3	7		M. sinensis 'Uruma-1b'			336	336		M. sinensis 'Uruma-1b'			3	3		M. sinensis 'Uruma-1b'			360	360		M. sinensis 'Uruma-1b'			1	1		M. sinensis 'Uruma-1b'						M. sinensis 'Uruma-1b'					26.3403	SE China Msi
M. sinensis x M. sacchariflorus 2x 'PMS-300'	3	3	3	9		M. sinensis x M. sacchariflorus 2x 'PMS-300'			169.667	169.667		M. sinensis x M. sacchariflorus 2x 'PMS-300'			3	3		M. sinensis x M. sacchariflorus 2x 'PMS-300'			211.667	211.667		M. sinensis x M. sacchariflorus 2x 'PMS-300'			3	3		M. sinensis x M. sacchariflorus 2x 'PMS-300'			228	228		M. sinensis x M. sacchariflorus 2x 'PMS-300'			3	3	30.8744	0
Grand Total	112	107	119	338		Grand Total	52.7843	63.9833	110.964	84.7828		Grand Total	51	60	110	221	dsfdsf	Grand Total	67.4138	85.44	136.248	111.592		Grand Total	29	50	105	184		Grand Total	84	106.791	154.21	134.893		Grand Total	7	43	81	131
